# Supplementary material for: Copper(ii)-mediated regioselective N-arylation of pyrroles, indoles, pyrazoles and carbazole via dehydrogenative coupling
Source: Royal Society of Chemistry journal article supplement (doi:10.1039/c5cc08206d), 2016-01-01

## Supporting Information

### Copper(II)-mediated regioselective *N*-arylation of pyrroles, indoles, pyrazoles and carbazole *via* dehydrogenative coupling

Pradeep Sadhu and Tharmalingam Punniyamurthy\*

*Department of Chemistry, Indian Institute of Technology Guwahati, Guwahati 781039, India*

#### Table of Contents

|                                                                                                                       |         |
|-----------------------------------------------------------------------------------------------------------------------|---------|
| 1. General Information                                                                                                | S2      |
| 2. General Procedure for the Amination of Substituted <i>N</i> -(Quinolin-8-yl)benzamide                              | S2      |
| 3. Procedure for Directing Group Removal                                                                              | S2      |
| 4. Crystal Structure and Data                                                                                         | S3-S4   |
| 5. Characterization Data of <i>N</i> -Arylated Azoles <b>2a-m</b> , <b>3a-j</b> , <b>4a-b</b> , <b>5</b> and <b>7</b> | S4-S14  |
| 6. NMR ( <sup>1</sup> H and <sup>13</sup> C) Spectra                                                                  | S15-S52 |

**General Information:** Cu(OAc)<sub>2</sub> (98%), Cs<sub>2</sub>CO<sub>3</sub>, 8-aminoquinoline (98%), pyrazole (98%), 3-methylpyrazole (97%) and 2-phenyl imidazole (98%) were purchased from Aldrich and were used as received. Pyrrole (99%) was purchased from Otto and distilled under nitrogen according to the standard procedure.<sup>1</sup> Indole (99%) was purchased from Otto and used as received. Substituted indoles and pyrroles were purchased from Avra synthesis. The solvents were purchased and dried according to standard procedure prior to use.<sup>2</sup> Substituted 8-aminoquinoline amides were prepared according to reported procedure.<sup>3</sup> 1-(2-Methyl-4-phenyl-1H-pyrrol-3-yl)ethan-1-one<sup>4</sup> and 2-(2-(1H-indol-3-yl)ethyl)isoindoline-1,3-dione<sup>5</sup> were prepared according to the literature. Purification of the reaction products was carried out by column chromatography using Merck aluminium oxide active, neutral Activity I-II. Analytical TLC was performed on Merck silica gel G/GF 254 plate. NMR spectra were recorded on Bruker Avance III 600 using CDCl<sub>3</sub> as solvent and Me<sub>4</sub>Si as internal standard. Chemical shifts ( $\delta$ ) were reported in ppm and spin-spin coupling constants ( $J$ ) were given in Hz. Melting points were determined using Büchi B-540 melting point apparatus and are uncorrected. FT-IR spectra were recorded using Thermo Fisher Scientific spectrometer. Mass spectra were recorded on a Q-ToF ESI-MS Instrument (model HAB 273). X-Ray data were collected on a Bruker SMART APEX equipped with a CCD area detector using Mo/K $\alpha$  radiation. The structure was solved by direct method using *SHELXL-97* (Göttingen, Germany).

**General Procedure for Cu(OAc)<sub>2</sub>-Mediated *N*-Arylation of Azoles.** Azoles (0.6 mmol, 3 equiv) were added to a stirred solution of the substrates **1** (0.2 mmol, 1 equiv), Cu(OAc)<sub>2</sub> (0.3 mmol, 1.5 equiv, 54.5 mg), Cs<sub>2</sub>CO<sub>3</sub> (0.4 mmol, 2 equiv, 130 mg) and solvent (1 mL) at 70 °C under air. The mixture was stirred and the progress of the reaction was monitored by TLC using ethyl acetate and hexane as eluent. After the appropriate time, the resulting solution was diluted with ethyl acetate (3 x 15 mL) and then washed with NH<sub>3</sub>·H<sub>2</sub>O (1 x 5 mL) and brine (2 x 5 mL). Drying over Na<sub>2</sub>SO<sub>4</sub> and evaporation of the solvent gave a residue that was purified on neutral alumina column chromatography using n-hexane and ethyl acetate as eluent to afford analytically pure substituted *N*-arylated azoles.

**Procedure for the Removal of Directing Group.** To a stirred solution of NaOH (1.4 mmol, 7.0 equiv, 56 mg) in EtOH (1.5 mL) was added 2-(1H-pyrrol-1-yl)-*N*-(quinolin-8-yl)benzamide **2a** (0.2 mmol, 1

equiv, 62.6 mg). The resultant solution was stirred at room temperature for 2 minutes and heated to 110 °C for 48 h. After completion, the reaction was cooled to room temperature, the resulting solution was diluted with ethyl acetate (4 x 15 mL) and then washed with 0.5 N HCl (4 x 5 mL) and brine (2 x 5 mL). Drying over Na<sub>2</sub>SO<sub>4</sub> and evaporation of the solvent gave a pure product as a pale brown solid.

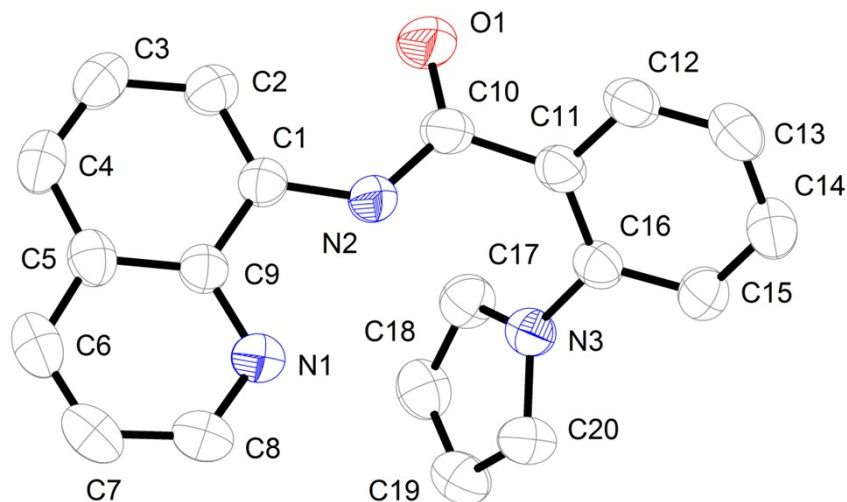

**Figure 1:** ORTEP diagram of 2-(1*H*-Pyrrol-1-yl)-*N*-(quinolin-8-yl)benzamide **2a** with 50% ellipsoid [CCDC 1427013].

### Crystal Data and Structure Refinement for **2a** at 296(2) K

|                      |                                                                              |
|----------------------|------------------------------------------------------------------------------|
| Identification code  | <b>2a</b>                                                                    |
| Empirical formula    | C <sub>20</sub> H <sub>15</sub> N <sub>3</sub> O                             |
| Formula weight       | 313.35                                                                       |
| Temperature          | 296(2)                                                                       |
| Wavelength           | 0.71073                                                                      |
| Crystal system       | monoclinic                                                                   |
| Space group          | ' <i>P</i> 2 <sub>1</sub> / <i>n</i> '                                       |
| Unit cell dimensions | <i>a</i> = 9.7059(3) Å<br><i>b</i> = 15.7541(4) Å<br><i>c</i> = 10.5250(3) Å |

|                                   |                                                           |
|-----------------------------------|-----------------------------------------------------------|
|                                   | $\alpha = \gamma = 90^\circ$<br>$\beta = 95.513(2)^\circ$ |
| Volume                            | 1601.91(8) Å <sup>3</sup>                                 |
| Z                                 | 4                                                         |
| Density (calculated)              | 1.299 Mg/m <sup>3</sup>                                   |
| Absorption coefficient            | 0.083                                                     |
| F(000)                            | 656                                                       |
| Crystal size                      | 0.44 x 0.36 x 0.28                                        |
| Theta range for data collection   | 2.33° to 24.99°                                           |
| Index ranges                      | -10 ≤ h ≤ 10, -18 ≤ k ≤ 18, -12 ≤ l ≤ 12                  |
| Reflections collected             | 21958                                                     |
| Independent reflections           | 2701                                                      |
| Completeness to theta = 24.99°    | 95.60 %                                                   |
| Absorption correction             | None                                                      |
| Refinement method                 | Full-matrix least-squares on F <sup>2</sup>               |
| Data / restraints / parameters    | 2701 / 0 / 217                                            |
| Goodness-of-fit on F <sup>2</sup> | 1.081                                                     |
| Final R indices [I > 2σ(I)]       | R1 = 0.0405, wR2 = 0.0961                                 |
| R indices (all data)              | R1 = 0.0466, wR2 = 0.1011                                 |

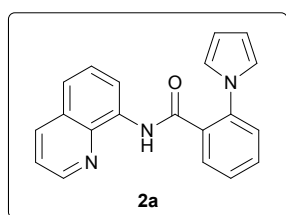

**2-(1H-Pyrrol-1-yl)-N-(quinolin-8-yl)benzamide 2a.** Analytical TLC on silica gel, 1:9 ethyl acetate/hexane  $R_f = 0.49$ ; white solid; 49 mg, yield 79%; mp 141-142 °C; <sup>1</sup>H NMR (600 MHz, CDCl<sub>3</sub>) δ

9.90 (br s, 1H), 8.84 (d,  $J = 7.8$  Hz, 1H), 8.66-8.65 (m, 1H), 8.12 (d,  $J = 7.8$  Hz, 1H), 7.90 (d,  $J = 7.8$  Hz, 1H), 7.59-7.44 (m, 5H), 7.41-7.39 (m, 1H), 6.99 (s, 2H), 6.18 (s, 2H);  $^{13}\text{C}\{\text{H}\}$  NMR (150 MHz,  $\text{CDCl}_3$ )  $\delta$  165.8, 148.1, 138.9, 138.6, 136.3, 134.7, 132.6, 131.6, 130.1, 128.0, 127.5, 126.5, 122.13, 122.1, 121.8, 121.5, 116.8, 110.6; FT-IR (KBr) 1670, 1601, 1522, 1498, 1385, 1329, 1262, 1070, 1014, 924, 898  $\text{cm}^{-1}$ . HRMS (ESI)  $m/z$ :  $[\text{M}+\text{H}]^+$  calcd for  $\text{C}_{20}\text{H}_{15}\text{N}_3\text{O}$  314.1293, found 314.1286.

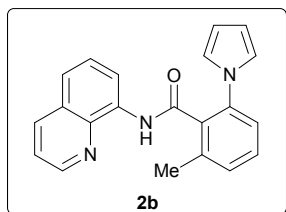

**2-Methyl-6-(1H-pyrrol-1-yl)-N-(quinolin-8-yl)benzamide 2b.** Analytical TLC on silica gel, 1:9 ethyl acetate/hexane  $R_f = 0.48$ ; white solid; 55 mg, yield 84%; mp 146-147  $^{\circ}\text{C}$ ;  $^1\text{H}$  NMR (600 MHz,  $\text{CDCl}_3$ )  $\delta$  9.72 (br s, 1H), 8.82 (dd,  $J = 7.2$  Hz, 1.2 Hz, 1H), 8.68 (dd,  $J = 4.8$  Hz, 1.8 Hz, 1H), 8.13 (dd,  $J = 9.0$  Hz, 1.8 Hz, 1H), 7.55-7.50 (m, 2H), 7.43-7.39 (m, 2H), 7.29-7.27 (m, 2H), 7.00-6.99 (m, 2H), 6.10-6.09 (m, 2H), 2.52 (s, 3H);  $^{13}\text{C}\{\text{H}\}$  NMR (150 MHz,  $\text{CDCl}_3$ )  $\delta$  166.4, 148.3, 138.63, 138.6, 137.4, 136.4, 134.4, 133.6, 130.1, 129.3, 128.1, 127.5, 123.4, 122.2, 121.8, 116.9, 110.0, 19.9; FT-IR (KBr) 3471, 1676, 1510, 1483, 1326, 1265, 1123, 1088, 951, 897  $\text{cm}^{-1}$ . HRMS (ESI)  $m/z$ :  $[\text{M}+\text{H}]^+$  calcd for  $\text{C}_{21}\text{H}_{17}\text{N}_3\text{O}$  328.1450, found 328.1448.

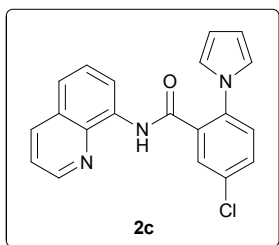

**5-Chloro-2-(1H-pyrrol-1-yl)-N-(quinolin-8-yl)benzamide 2c.** Analytical TLC on silica gel, 1:9 ethyl acetate/hexane  $R_f = 0.47$ ; white solid; 48 mg, yield 69%; mp 173-174  $^{\circ}\text{C}$ ;  $^1\text{H}$  NMR (600 MHz,  $\text{CDCl}_3$ )  $\delta$  9.90 (br s, 1H), 8.80 (d,  $J = 7.2$  Hz, 1H), 8.65 (d,  $J = 3.6$  Hz, 1H), 8.13 (d,  $J = 8.4$  Hz, 1H), 7.87 (s, 1H), 7.55-7.51 (m, 3H), 7.42-7.40 (m, 1H), 7.38 (d,  $J = 8.4$  Hz, 1H), 6.95 (s, 2H), 6.19 (s, 2H);  $^{13}\text{C}\{\text{H}\}$  NMR

(150 MHz, CDCl<sub>3</sub>)  $\delta$  164.2, 148.2, 138.5, 137.3, 136.3, 134.3, 133.7, 133.3, 131.6, 130.1, 128.0, 127.8, 127.4, 122.4, 122.1, 121.9, 116.9, 111.0; FT-IR (KBr) 3330, 1670, 1523, 1494, 1327, 1260, 1108, 1073, 925, 825 cm<sup>-1</sup>. HRMS (ESI) m/z: [M+H]<sup>+</sup> calcd for C<sub>20</sub>H<sub>14</sub>ClN<sub>3</sub>O 348.0904, found 348.0901.

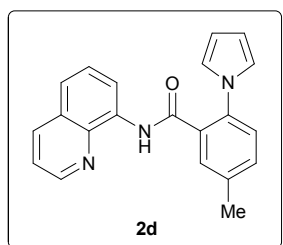

**5-Methyl-2-(1H-pyrrol-1-yl)-N-(quinolin-8-yl)benzamide 2d.** Analytical TLC on silica gel, 1:9 ethyl acetate/hexane  $R_f = 0.41$ ; white solid; 51 mg, yield 78%; mp 145-146 °C; <sup>1</sup>H NMR (600 MHz, CDCl<sub>3</sub>)  $\delta$  9.87 (br s, 1H), 8.83 (d,  $J = 7.2$  Hz, 1H), 8.65 (d,  $J = 3.6$  Hz, 1H), 8.12 (d,  $J = 7.8$  Hz, 1H), 7.69 (s, 1H), 7.55-7.49 (m, 2H), 7.41-7.36 (m, 2H), 7.33 (d,  $J = 7.8$  Hz, 1H), 6.96 (s, 2H), 6.16 (s, 2H), 2.46 (s, 3H); <sup>13</sup>C{<sup>1</sup>H} NMR (150 MHz, CDCl<sub>3</sub>)  $\delta$  166.0, 148.1, 138.6, 137.6, 136.4, 136.3, 134.7, 132.4, 132.2, 130.5, 128.0, 127.5, 126.4, 122.2, 122.0, 121.8, 116.8, 110.4, 21.2; FT-IR (KBr) 1665, 1648, 1524, 1485, 1384, 1327, 1262, 1070, 1015, 824 cm<sup>-1</sup>. HRMS (ESI) m/z: [M+H]<sup>+</sup> calcd for C<sub>21</sub>H<sub>17</sub>N<sub>3</sub>O 328.1450, found 328.1458.

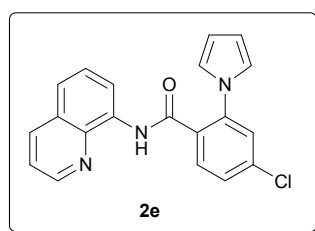

**4-Chloro-2-(1H-pyrrol-1-yl)-N-(quinolin-8-yl)benzamide 2e.** Analytical TLC on silica gel, 1:9 ethyl acetate/hexane  $R_f = 0.49$ ; thick liquid; 44 mg, yield 63%; <sup>1</sup>H NMR (600 MHz, CDCl<sub>3</sub>)  $\delta$  9.90 (br s, 1H), 8.81 (d,  $J = 7.2$  Hz, 1H), 8.64 (d,  $J = 2.4$  Hz, 1H), 8.12 (d,  $J = 8.4$  Hz, 1H), 7.85 (d,  $J = 8.4$  Hz, 1H), 7.55-7.50 (m, 2H), 7.45-7.44 (m, 2H), 7.41-7.39 (m, 1H), 6.97 (s, 2H), 6.19 (s, 2H); <sup>13</sup>C{<sup>1</sup>H} NMR (150 MHz, CDCl<sub>3</sub>)  $\delta$  164.8, 148.1, 139.8, 138.5, 137.3, 136.3, 134.4, 131.5, 130.7, 128.0, 127.6, 127.4, 126.5, 122.3,

122.0, 121.9, 116.8, 111.2; FT-IR (neat) 1673, 1595, 1527, 1482, 1385, 1326, 1263, 1108, 1021, 920, 825  $\text{cm}^{-1}$ . HRMS (ESI)  $m/z$ :  $[M+H]^+$  calcd for  $\text{C}_{20}\text{H}_{14}\text{ClN}_3\text{O}$  348.0904, found 348.0904.

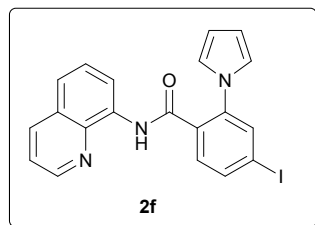

**4-Iodo-2-(1H-pyrrol-1-yl)-N-(quinolin-8-yl)benzamide 2f.** Analytical TLC on silica gel, 1:9 ethyl acetate/hexane  $R_f = 0.49$ ; white solid; 54 mg, yield 61%; mp 125-126  $^{\circ}\text{C}$ ;  $^1\text{H}$  NMR (600 MHz,  $\text{CDCl}_3$ )  $\delta$  9.90 (br s, 1H), 8.80 (d,  $J = 7.2$  Hz, 1H), 8.64-8.63 (m, 1H), 8.12 (d,  $J = 8.4$  Hz, 1H), 7.82-7.81 (m, 2H), 7.62 (d,  $J = 8.4$  Hz, 1H), 7.55-7.50 (m, 2H), 7.41-7.39 (m, 1H), 6.96 (s, 2H), 6.18 (s, 2H);  $^{13}\text{C}\{^1\text{H}\}$  NMR (150 MHz,  $\text{CDCl}_3$ )  $\delta$  164.9, 148.2, 139.6, 138.5, 136.5, 136.3, 135.3, 134.4, 131.8, 131.5, 128.0, 127.4, 122.3, 122.0, 121.9, 116.8, 111.2, 97.1; FT-IR (KBr) 1669, 1583, 1523, 1488, 1384, 1263, 1067, 1017, 929, 896  $\text{cm}^{-1}$ . HRMS (ESI)  $m/z$ :  $[M+H]^+$  calcd for  $\text{C}_{20}\text{H}_{14}\text{IN}_3\text{O}$  440.0260, found 440.0266.

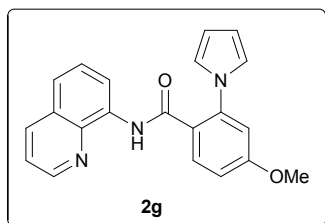

**4-Methoxy-2-(1H-pyrrol-1-yl)-N-(quinolin-8-yl)benzamide 2g.** Analytical TLC on silica gel, 1:9 ethyl acetate/hexane  $R_f = 0.32$ ; white solid; 48 mg, yield 70%; mp 127-128  $^{\circ}\text{C}$ ;  $^1\text{H}$  NMR (600 MHz,  $\text{CDCl}_3$ )  $\delta$  9.86 (br s, 1H), 8.83 (d,  $J = 7.2$  Hz, 1H), 8.63 (dd,  $J = 4.2$  Hz, 1.2 Hz, 1H), 8.11 (dd,  $J = 8.4$  Hz, 1.2 Hz, 1H), 7.90 (d,  $J = 9.0$  Hz, 1H), 7.54 (t,  $J = 8.4$  Hz, 1H), 7.49 (dd,  $J = 8.4$  Hz, 1.2 Hz, 1H), 7.39-7.37 (m, 1H), 7.01-6.98 (m, 3H), 6.92 (d,  $J = 2.4$  Hz, 1H), 6.192-6.19 (m, 2H), 3.90 (s, 3H);  $^{13}\text{C}\{^1\text{H}\}$  NMR (150 MHz,  $\text{CDCl}_3$ )  $\delta$  165.4, 162.1, 148.0, 140.5, 138.6, 136.2, 134.8, 132.0, 128.0, 127.5, 124.8, 122.1, 121.8, 121.7, 116.6, 113.2, 111.9, 110.7, 55.9; FT-IR (KBr) 3439, 1664, 1609, 1522, 1325, 1246, 1232, 1048, 898  $\text{cm}^{-1}$ . HRMS (ESI)  $m/z$ :  $[M+H]^+$  calcd for  $\text{C}_{21}\text{H}_{17}\text{N}_3\text{O}_2$  344.1399, found 344.1402.

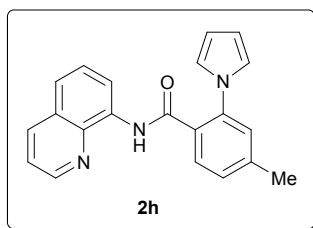

**4-Methyl-2-(1*H*-pyrrol-1-yl)-*N*-(quinolin-8-yl)benzamide 2h.** Analytical TLC on silica gel, 1:9 ethyl acetate/hexane  $R_f = 0.49$ ; white solid; 44 mg, yield 68%; mp 140-141 °C;  $^1\text{H}$  NMR (600 MHz,  $\text{CDCl}_3$ )  $\delta$  9.89 (br s, 1H), 8.84 (d,  $J = 7.2$  Hz, 1H), 8.64-8.63 (m, 1H), 8.11 (d,  $J = 7.8$  Hz, 1H), 7.81 (d,  $J = 7.8$  Hz, 1H), 7.54 (t,  $J = 7.8$  Hz, 1H), 7.49 (d,  $J = 8.4$  Hz, 1H), 7.39-7.37 (m, 1H), 7.28 (d,  $J = 7.8$  Hz, 1H), 7.24 (s, 1H), 6.98 (s, 2H), 6.18 (s, 2H), 2.46 (s, 3H);  $^{13}\text{C}\{\text{H}\}$  NMR (150 MHz,  $\text{CDCl}_3$ )  $\delta$  165.8, 148.0, 142.3, 138.8, 138.6, 136.2, 134.7, 130.2, 129.7, 128.2, 128.0, 127.5, 127.1, 122.1, 121.9, 121.7, 116.7, 110.5, 21.5; FT-IR (KBr) 1668, 1614, 1524, 1487, 1385, 1326, 1262, 1099, 1072, 897  $\text{cm}^{-1}$ . HRMS (ESI)  $m/z$ :  $[\text{M}+\text{H}]^+$  calcd for  $\text{C}_{21}\text{H}_{17}\text{N}_3\text{O}$  328.1450, found 328.1451.

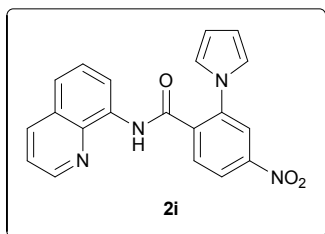

**4-Nitro-2-(1*H*-pyrrol-1-yl)-*N*-(quinolin-8-yl)benzamide 2i.** Analytical TLC on silica gel, 1:9 ethyl acetate/hexane  $R_f = 0.10$ ; thick yellow liquid; 44 mg, yield 62%;  $^1\text{H}$  NMR (600 MHz,  $\text{CDCl}_3$ )  $\delta$  9.99 (br s, 1H), 8.80 (d,  $J = 3.6$  Hz, 1H), 8.65 (d,  $J = 3.6$  Hz, 1H), 8.32-8.29 (m, 2H), 8.15 (d,  $J = 8.4$  Hz, 1H), 8.06 (d,  $J = 8.4$  Hz, 1H), 7.56 (d,  $J = 3.6$  Hz, 2H), 7.44-7.42 (m, 1H), 7.03 (s, 2H), 6.24 (s, 2H);  $^{13}\text{C}\{\text{H}\}$  NMR (150 MHz,  $\text{CDCl}_3$ )  $\delta$  163.8, 149.4, 148.3, 139.7, 138.5, 137.4, 136.4, 134.0, 131.5, 128.0, 127.4, 122.8, 122.0, 121.9, 121.8, 121.3, 117.1, 111.9; FT-IR (neat) 1678, 1525, 1486, 1348, 1262, 1074, 1023, 946, 898  $\text{cm}^{-1}$ . HRMS (ESI)  $m/z$ :  $[\text{M}+\text{H}]^+$  calcd for  $\text{C}_{20}\text{H}_{14}\text{N}_4\text{O}_3$  359.1144, found 359.1147.



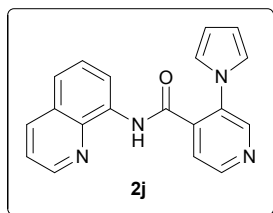

**3-(1H-Pyrrol-1-yl)-N-(quinolin-8-yl)isonicotinamide 2j.** Analytical TLC on silica gel, 1:9 ethyl acetate/hexane  $R_f = 0.20$ ; white solid; 32 mg, yield 51%; mp 179-180 °C;  $^1\text{H}$  NMR (600 MHz,  $\text{CDCl}_3$ )  $\delta$  10.03 (br s, 1H), 8.81 (t,  $J = 4.2$  Hz, 1H), 8.78 (s, 1H), 8.75 (d,  $J = 4.8$  Hz, 1H), 8.66-8.65 (m, 1H), 8.15-8.14 (m, 1H), 7.79 (d,  $J = 4.8$  Hz, 1H), 7.56 (d,  $J = 4.2$  Hz, 2H), 7.44-7.42 (m, 1H), 7.015-7.01 (m, 2H), 6.273-6.27 (m, 2H);  $^{13}\text{C}\{\text{H}\}$  NMR (150 MHz,  $\text{CDCl}_3$ )  $\delta$  163.3, 148.9, 148.3, 147.9, 138.7, 138.5, 136.4, 134.2, 134.0, 128.0, 127.4, 123.2, 122.8, 122.2, 122.0, 117.2, 111.6; FT-IR (KBr) 1677, 1527, 1486, 1425, 1326, 1265, 1114, 1076, 1013, 922, 826  $\text{cm}^{-1}$ . HRMS (APCI)  $m/z$ :  $[\text{M}+\text{H}]^+$  calcd for  $\text{C}_{19}\text{H}_{14}\text{N}_4\text{O}$  315.1246, found 315.1243.

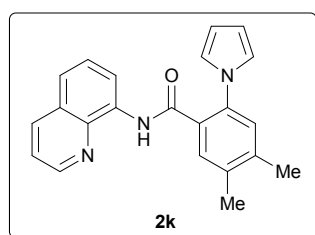

**4,5-Dimethyl-2-(1H-pyrrol-1-yl)-N-(quinolin-8-yl)benzamide 2k.** Analytical TLC on silica gel, 1:9 ethyl acetate/hexane  $R_f = 0.50$ ; white solid; 48 mg, yield 71%; mp 195-196 °C;  $^1\text{H}$  NMR (600 MHz,  $\text{CDCl}_3$ )  $\delta$  9.87 (br s, 1H), 8.83 (d,  $J = 7.8$  Hz, 1H), 8.63 (d,  $J = 3.0$  Hz, 1H), 8.11 (d,  $J = 8.4$  Hz, 1H), 7.68 (s, 1H), 7.54 (t,  $J = 7.8$  Hz, 1H), 7.49 (d,  $J = 8.4$  Hz, 1H), 7.39-7.37 (m, 1H), 7.20 (s, 1H), 6.95 (s, 2H), 6.16 (s, 2H), 2.37 (s, 3H), 2.36 (s, 3H);  $^{13}\text{C}\{\text{H}\}$  NMR (150 MHz,  $\text{CDCl}_3$ )  $\delta$  165.9, 148.0, 140.8, 138.6, 136.6, 136.3, 136.2, 134.8, 131.1, 129.8, 128.0, 127.7, 127.5, 122.2, 121.9, 121.7, 116.7, 110.3, 19.9, 19.5; FT-IR (KBr) 1662, 1529, 1488, 1385, 1329, 1263, 1090, 1023, 862  $\text{cm}^{-1}$ . HRMS (ESI)  $m/z$ :  $[\text{M}+\text{H}]^+$  calcd for  $\text{C}_{22}\text{H}_{19}\text{N}_3\text{O}$  342.1606, found 342.1608.

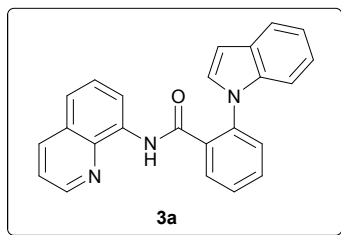

**2-(1H-Indol-1-yl)-N-(quinolin-8-yl)benzamide 3a.** Analytical TLC on silica gel, 1:9 ethyl acetate/hexane  $R_f = 0.46$ ; white solid; 54 mg, yield 74%; mp 133-134°C;  $^1\text{H NMR}$  (600 MHz,  $\text{CDCl}_3$ )  $\delta$  9.96 (br s, 1H), 8.72 (d,  $J = 7.2$  Hz, 1H), 8.14-8.13 (m, 1H), 8.02 (dd,  $J = 4.2$  Hz, 1.2 Hz, 1H), 7.98 (d,  $J = 8.4$  Hz, 1H), 7.66 (td,  $J = 7.8$  Hz, 1.2 Hz, 1H), 7.59-7.51 (m, 3H), 7.49 (d,  $J = 8.4$  Hz, 1H), 7.46 (t,  $J = 7.8$  Hz, 1H), 7.40 (d,  $J = 8.4$  Hz, 1H), 7.29 (d,  $J = 3.0$  Hz, 1H), 7.26-7.24 (m, 1H), 7.23-7.20 (m, 1H), 7.13 (t,  $J = 7.2$  Hz, 1H), 6.52 (d,  $J = 3.0$  Hz, 1H);  $^{13}\text{C}\{^1\text{H}\}$  NMR (150 MHz,  $\text{CDCl}_3$ )  $\delta$  164.9, 147.8, 138.2, 137.5, 137.1, 135.9, 134.4, 133.6, 132.0, 131.3, 129.6, 129.1, 128.3, 128.2, 127.7, 127.3, 122.8, 121.9, 121.5, 121.2, 120.6, 116.5, 110.7, 104.8; FT-IR (KBr) 1672, 1596, 1482, 1385, 1326, 1264, 1212, 1143, 1012, 897  $\text{cm}^{-1}$ . HRMS (ESI)  $m/z$ :  $[\text{M}+\text{H}]^+$  calcd for  $\text{C}_{24}\text{H}_{17}\text{N}_3\text{O}$  364.1450, found 364.1451.

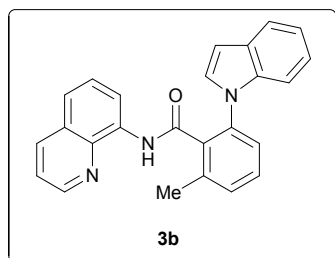

**2-(1H-Indol-1-yl)-6-methyl-N-(quinolin-8-yl)benzamide 3b.** Analytical TLC on silica gel, 1:9 ethyl acetate/hexane  $R_f = 0.45$ ; white solid; 61 mg, yield 81%; mp 175-176 °C;  $^1\text{H NMR}$  (600 MHz,  $\text{CDCl}_3$ )  $\delta$  9.58 (br s, 1H), 8.64 (d,  $J = 7.2$  Hz, 1H), 8.29 (d,  $J = 3.6$  Hz, 1H), 7.99 (d,  $J = 7.8$  Hz, 1H), 7.50-7.39 (m, 5H), 7.37 (d,  $J = 7.2$  Hz, 2H), 7.32 (s, 1H), 7.25-7.23 (m, 1H), 7.22 (t,  $J = 7.8$  Hz, 1H), 7.03 (t,  $J = 7.8$  Hz, 1H), 6.36 (s, 1H), 2.57 (s, 3H);  $^{13}\text{C}\{^1\text{H}\}$  NMR (150 MHz,  $\text{CDCl}_3$ )  $\delta$  165.9, 147.9, 138.2, 138.1, 137.5, 136.7, 136.1, 135.5, 134.1, 130.2, 130.1, 129.1, 128.9, 127.7, 127.2, 125.4, 122.3, 122.1, 121.5, 120.9, 120.3, 116.6, 110.8, 103.7, 20.0; FT-IR (KBr) 1675, 1596, 1524, 1482, 1385, 1326, 1264, 1212, 1116, 1012, 897  $\text{cm}^{-1}$ . HRMS (ESI)  $m/z$ :  $[\text{M}+\text{H}]^+$  calcd for  $\text{C}_{25}\text{H}_{19}\text{N}_3\text{O}$  378.1606, found 378.1598.

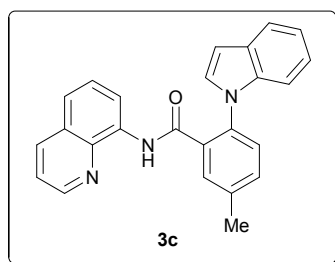

**2-(1*H*-Indol-1-yl)-5-methyl-*N*-(quinolin-8-yl)benzamide 3c** . Analytical TLC on silica gel, 1:9 ethyl acetate/hexane  $R_f = 0.40$ ; white solid; 58 mg, yield 77%; mp 147-148 °C;  $^1\text{H}$  NMR (600 MHz,  $\text{CDCl}_3$ )  $\delta$  9.94 (br s, 1H), 8.72 (d,  $J = 7.2$  Hz, 1H), 8.00-7.97 (m, 2H), 7.94 (s, 1H), 7.53 (d,  $J = 7.8$  Hz, 1H), 7.47-7.39 (m, 6H), 7.25-7.20 (m, 2H), 7.13 (t,  $J = 7.2$  Hz, 1H), 6.50 (d,  $J = 3.0$  Hz, 1H), 2.53 (s, 3H);  $^{13}\text{C}\{\text{H}\}$  NMR (150 MHz,  $\text{CDCl}_3$ )  $\delta$  165.1, 147.7, 138.4, 138.3, 137.7, 135.9, 134.5, 133.3, 132.7, 131.6, 129.5, 129.2, 128.3, 127.7, 127.3, 122.7, 121.8, 121.5, 121.1, 120.5, 116.5, 110.7, 104.6, 21.3; FT-IR (KBr) 1729, 1667, 1524, 1485, 1384, 1327, 1260, 1133, 928, 825  $\text{cm}^{-1}$ . HRMS (ESI)  $m/z$ :  $[\text{M}+\text{H}]^+$  calcd for  $\text{C}_{25}\text{H}_{19}\text{N}_3\text{O}$  378.1606, found 378.1604.

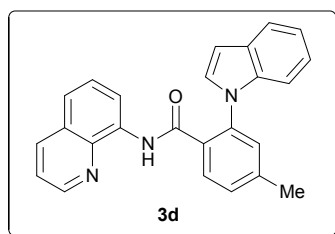

**2-(1*H*-Indol-1-yl)-4-methyl-*N*-(quinolin-8-yl)benzamide 3d**. Analytical TLC on silica gel, 1:9 ethyl acetate/hexane  $R_f = 0.46$ ; colourless thick liquid; 52 mg, yield 69%;  $^1\text{H}$  NMR (600 MHz,  $\text{CDCl}_3$ )  $\delta$  9.98 (br s, 1H), 8.72 (d,  $J = 7.8$  Hz, 1H), 8.07 (d,  $J = 7.8$  Hz, 1H), 7.98-7.96 (m, 2H), 7.54 (d,  $J = 8.4$  Hz, 1H), 7.48-7.43 (m, 2H), 7.39 (d,  $J = 7.8$  Hz, 2H), 7.33 (s, 1H), 7.27-7.23 (m, 2H), 7.22-7.19 (m, 1H), 7.14 (t,  $J = 7.2$  Hz, 1H), 6.53 (d,  $J = 2.4$  Hz, 1H), 2.48 (s, 3H);  $^{13}\text{C}\{\text{H}\}$  NMR (150 MHz,  $\text{CDCl}_3$ )  $\delta$  164.9, 147.7, 142.8, 138.2, 137.6, 137.0, 135.9, 134.5, 131.3, 130.5, 129.6, 129.2, 129.1, 128.8, 127.7, 127.3, 122.7, 121.7, 121.5, 121.2, 120.6, 116.4, 110.7, 104.8, 21.5; FT-IR (neat) 1666, 1527, 1461, 1327, 1276, 1212, 1135, 1012, 900  $\text{cm}^{-1}$ . HRMS (ESI)  $m/z$ :  $[\text{M}+\text{H}]^+$  calcd for  $\text{C}_{25}\text{H}_{19}\text{N}_3\text{O}$  378.1606, found 378.1597.

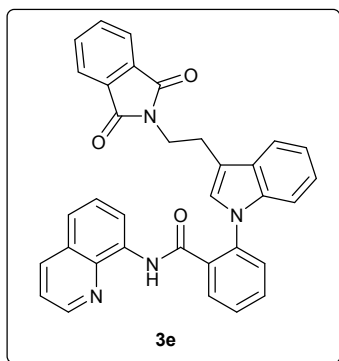

**2-(3-(2-(1,3-Dioxoisindolin-2-yl)ethyl)-1H-indol-1-yl)-N-(quinolin-8-yl)benzamide 3e.** Analytical TLC on silica gel, 1:9 ethyl acetate/hexane  $R_f = 0.24$ ; white solid; 61 mg, yield 57%; mp 179-180 °C;  $^1\text{H}$  NMR (600 MHz,  $\text{CDCl}_3$ )  $\delta$  9.90 (br s, 1H), 8.71 (d,  $J = 7.2$  Hz, 1H), 8.18 (dd,  $J = 7.8$  Hz, 1.2 Hz, 1H), 7.99 (dd,  $J = 4.2$  Hz, 1.2 Hz, 1H), 7.95 (dd,  $J = 9.2$  Hz, 1.2 Hz, 1H), 7.80-7.94 (m, 2H), 7.69-7.63 (m, 2H), 7.59-7.57 (m, 2H), 7.56-7.52 (m, 2H), 7.47-7.42 (m, 2H), 7.37 (d,  $J = 7.8$  Hz, 1H), 7.27-7.25 (m, 1H), 7.23-7.21 (m, 2H), 7.17 (t,  $J = 7.2$  Hz, 1H), 3.42-3.39 (m, 2H), 2.90-2.87 (m, 2H);  $^{13}\text{C}\{\text{H}\}$  NMR (150 MHz,  $\text{CDCl}_3$ )  $\delta$  168.3, 165.0, 147.8, 138.1, 137.9, 137.0, 135.9, 134.4, 134.1, 133.4, 132.3, 132.0, 131.4, 129.1, 128.1, 127.6, 127.3, 126.8, 123.3, 123.1, 121.8, 121.5, 120.5, 120.5, 119.3, 116.4, 114.7, 110.7, 37.9, 24.5; FT-IR (KBr) 2921, 1770, 1711, 1668, 1527, 1486, 1397, 1328, 1258, 1224, 1128, 1052, 825  $\text{cm}^{-1}$ . HRMS (ESI)  $m/z$ :  $[\text{M}+\text{H}]^+$  calcd for  $\text{C}_{34}\text{H}_{24}\text{N}_4\text{O}_3$  537.1927, found 537.1294.

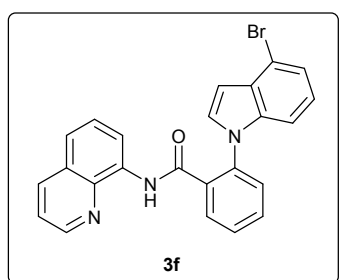

**2-(4-Bromo-1H-indol-1-yl)-N-(quinolin-8-yl) 3f.** Analytical TLC on silica gel, 1:9 ethyl acetate/hexane  $R_f = 0.43$ ; white solid; 69 mg, yield 78%; mp 148-149 °C;  $^1\text{H}$  NMR (400 MHz,  $\text{CDCl}_3$ )  $\delta$  9.83 (br s, 1H), 8.63 (d,  $J = 7.2$  Hz, 1H), 8.08 (d,  $J = 7.6$  Hz, 1H), 8.00 (d,  $J = 4.4$  Hz, 1H), 7.94 (d,  $J = 8.4$  Hz, 1H), 7.60-7.51 (m, 2H), 7.43-7.30 (m, 4H), 7.26 (d,  $J = 3.2$  Hz, 1H), 7.22-7.17 (m, 2H), 7.02 (t,  $J = 8.0$  Hz, 1H), 6.50 (d,  $J = 3.2$  Hz, 1H);  $^{13}\text{C}\{\text{H}\}$  NMR (100 MHz,  $\text{CDCl}_3$ )  $\delta$  164.6, 147.9, 138.2, 137.8, 136.6, 136.1,

134.2, 133.5, 132.1, 131.4, 130.3, 129.7, 128.7, 128.4, 127.7, 127.2, 123.7, 123.6, 122.1, 121.7, 116.6, 115.1, 109.9, 105.1; FT-IR (KBr) 1668, 1596, 1486, 1385, 1359, 1297, 1203, 1179, 1086, 888  $\text{cm}^{-1}$ . HRMS (ESI)  $m/z$ :  $[M+H]^+$  calcd for  $\text{C}_{24}\text{H}_{16}\text{BrN}_3\text{O}$  444.0535, found 444.0532.

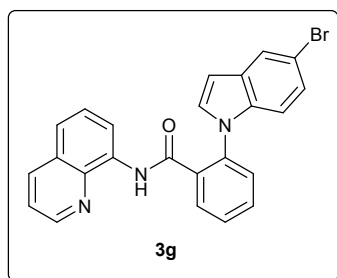

**2-(5-Bromo-1H-indol-1-yl)-N-(quinolin-8-yl)benzamide 3g.** Analytical TLC on silica gel, 1:9 ethyl acetate/hexane  $R_f = 0.45$ ; white solid; 66 mg, yield 75%; mp 141-142  $^{\circ}\text{C}$ ;  $^1\text{H}$  NMR (400 MHz,  $\text{CDCl}_3$ )  $\delta$  9.84 (br s, 1H), 8.71 (dd,  $J = 7.6$  Hz, 2.0 Hz, 1H), 8.11-8.09 (m, 2H), 8.02 (dd,  $J = 8.4$  Hz, 1.6 Hz, 1H), 7.67-7.65 (m, 1H), 7.62-7.58 (m, 2H), 7.53 (d,  $J = 7.6$  Hz, 1H), 7.48-7.41 (m, 2H), 7.34 (d,  $J = 2.4$  Hz, 2H), 7.30-7.25 (m, 2H), 6.43 (d,  $J = 3.2$  Hz, 1H);  $^{13}\text{C}\{^1\text{H}\}$  NMR (150 MHz,  $\text{CDCl}_3$ )  $\delta$  164.8, 147.8, 138.1, 136.5, 136.2, 136.1, 134.2, 133.9, 132.1, 131.2, 131.1, 130.3, 128.7, 128.2, 127.7, 127.3, 125.6, 123.7, 122.1, 121.7, 116.4, 113.9, 112.2, 104.1; FT-IR (KBr) 1669, 1596, 1486, 1386, 1327, 1289, 1227, 1198, 1053, 896  $\text{cm}^{-1}$ . HRMS (ESI)  $m/z$ :  $[M+H]^+$  calcd for  $\text{C}_{24}\text{H}_{16}\text{BrN}_3\text{O}$  442.0555, found 442.0554.

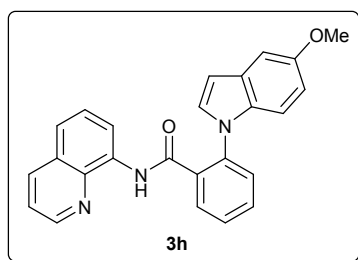

**2-(5-Methoxy-1H-indol-1-yl)-N-(quinolin-8-yl)benzamide 3h.** Analytical TLC on silica gel, 1:9 ethyl acetate/hexane  $R_f = 0.32$ ; white solid; 64 mg, yield 81%; mp 150-151  $^{\circ}\text{C}$ ;  $^1\text{H}$  NMR (400 MHz,  $\text{CDCl}_3$ )  $\delta$  9.96 (br s, 1H), 8.73 (dd,  $J = 7.6$  Hz, 1.6 Hz, 1H), 8.13-8.09 (m, 2H), 7.99 (dd,  $J = 8.4$  Hz, 1.6 Hz, 1H), 7.66 (td,  $J = 7.6$  Hz, 1.6 Hz, 1H), 7.58-7.52 (m, 2H), 7.47 (t,  $J = 8.0$  Hz, 1H), 7.41-7.36 (m, 2H), 7.27-7.22 (m, 2H), 6.97 (d,  $J = 2.4$  Hz, 1H), 6.91-6.88 (m, 1H), 6.44 (d,  $J = 3.2$  Hz, 1H), 3.81 (s, 3H);  $^{13}\text{C}\{^1\text{H}\}$

NMR (100 MHz, CDCl<sub>3</sub>)  $\delta$  165.0, 154.8, 147.7, 138.2, 137.1, 136.0, 134.4, 133.5, 132.8, 131.9, 131.1, 130.1, 129.7, 128.1, 127.7, 127.2, 121.9, 121.5, 116.4, 112.8, 111.4, 104.5, 102.9, 56.0; FT-IR (KBr) 1668, 1598, 1487, 1386, 1327, 1256, 1218, 1193, 1032, 899 cm<sup>-1</sup>. HRMS (ESI) m/z: [M+H]<sup>+</sup> calcd for C<sub>25</sub>H<sub>19</sub>N<sub>3</sub>O<sub>2</sub> 394.1556, found 394.1556.

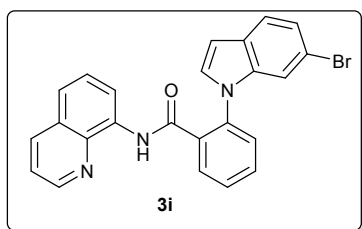

**2-(6-Bromo-1H-indol-1-yl)-N-(quinolin-8-yl)benzamide 3a.** Analytical TLC on silica gel, 1:9 ethyl acetate/hexane  $R_f$  = 0.46; white solid; 68 mg, yield 77%; mp 110-111 °C; <sup>1</sup>H NMR (400 MHz, CDCl<sub>3</sub>)  $\delta$  9.78 (br s, 1H), 8.63 (dd,  $J$  = 7.6 Hz, 1.6 Hz, 1H), 8.03-7.99 (m, 2H), 7.91 (dd,  $J$  = 8.0 Hz, 1.6 Hz, 1H), 7.60-7.57 (m, 2H), 7.54-7.50 (m, 1H), 7.46-7.37 (m, 1H), 7.35-7.31 (m, 2H), 7.28 (d,  $J$  = 8.4 Hz, 1H), 7.17-7.14 (m, 3H), 6.36 (d,  $J$  = 3.2 Hz, 1H); <sup>13</sup>C{H} NMR (100 MHz, CDCl<sub>3</sub>)  $\delta$  164.8, 147.9, 138.2, 138.1, 136.3, 136.0, 134.2, 134.1, 132.0, 131.1, 129.8, 128.7, 128.24, 128.2, 127.7, 127.2, 123.9, 122.4, 122.0, 121.6, 116.4, 116.3, 113.7, 104.7; FT-IR (KBr) 1671, 1597, 1485, 1385, 1327, 1267, 1230, 1137, 1052, 891 cm<sup>-1</sup>. HRMS (ESI) m/z: [M+H]<sup>+</sup> calcd for C<sub>24</sub>H<sub>16</sub>BrN<sub>3</sub>O 442.0555, found 442.0553.

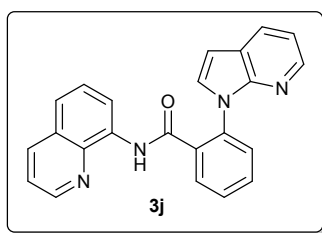

**2-(1H-Pyrrolo[2,3-b]pyridin-1-yl)-N-(quinolin-8-yl)benzamide 3a.** Analytical TLC on silica gel, 1:9 ethyl acetate/hexane  $R_f$  = 0.28; colourless thick liquid; 46 mg, yield 63%; <sup>1</sup>H NMR (600 MHz, CDCl<sub>3</sub>)  $\delta$  9.91 (br s, 1H), 8.60 (d,  $J$  = 7.2 Hz, 1H), 8.24 (d,  $J$  = 4.8 Hz, 1H), 8.12-8.11 (m, 1H), 7.97 (d,  $J$  = 7.8 Hz, 1H), 7.93 (d,  $J$  = 8.4 Hz, 1H), 7.73 (dd,  $J$  = 7.8 Hz, 1.2 Hz, 1H), 7.60-7.56 (m, 2H), 7.51 (t,  $J$  = 7.2 Hz, 1H), 7.38-7.32 (m, 3H), 7.19-7.17 (m, 1H), 6.97-6.95 (m, 1H), 6.40 (d,  $J$  = 3.6 Hz, 1H); <sup>13</sup>C{H} NMR

(150 MHz, CDCl<sub>3</sub>)  $\delta$  165.5, 148.7, 147.9, 143.9, 138.3, 136.0, 135.6, 134.5, 134.2, 131.8, 130.4, 129.5, 129.2, 128.7, 128.4, 127.8, 127.3, 121.8, 121.51, 121.5, 116.8, 116.5, 102.4; FT-IR (KBr) 1670, 1586, 1485, 1384, 1326, 1281, 1202, 1130, 1052, 896 cm<sup>-1</sup>. HRMS (ESI)  $m/z$ : [M+H]<sup>+</sup> calcd for C<sub>23</sub>H<sub>16</sub>N<sub>4</sub>O 365.1402, found 365.1408.

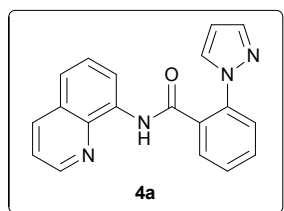

**2-(1H-Pyrazol-1-yl)-N-(quinolin-8-yl)benzamide 4a.** Analytical TLC on silica gel, 1:5 ethyl acetate/hexane  $R_f$  = 0.48; white solid; 34 mg, yield 54%; mp 122-123 °C; <sup>1</sup>H NMR (600 MHz, CDCl<sub>3</sub>)  $\delta$  9.99 (br s, 1H), 8.83 (dd,  $J$  = 7.2 Hz, 1.2 Hz, 1H), 8.70 (dd,  $J$  = 4.8 Hz, 1.8 Hz, 1H), 8.13 (dd,  $J$  = 7.8 Hz, 1.2 Hz, 1H), 7.87 (d,  $J$  = 7.8 Hz, 1H), 7.81 (d,  $J$  = 2.4 Hz, 1H), 7.63-7.60 (m, 3H), 7.55-7.50 (m, 3H), 7.42-7.40 (m, 1H), 6.30-6.29 (m, 1H); <sup>13</sup>C{H} NMR (150 MHz, CDCl<sub>3</sub>)  $\delta$  165.8, 148.3, 141.6, 138.6, 138.2, 136.3, 134.7, 132.5, 131.4, 130.7, 129.7, 128.4, 128.0, 127.5, 125.8, 122.1, 121.8, 116.9, 107.7; FT-IR (KBr) 1671, 1603, 1520, 1485, 1385, 1326, 1265, 1099, 1043, 937, 826 cm<sup>-1</sup>. HRMS (ESI)  $m/z$ : [M+H]<sup>+</sup> calcd for C<sub>19</sub>H<sub>14</sub>N<sub>4</sub>O 315.1246, found 315.1247.

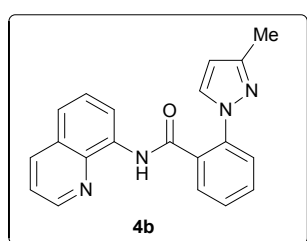

**2-(3-Methyl-1H-pyrazol-1-yl)-N-(quinolin-8-yl)benzamide 4b.** Analytical TLC on silica gel, 1:5 ethyl acetate/hexane  $R_f$  = 0.51; colourless thick liquid; 38 mg, yield 58%; <sup>1</sup>H NMR (600 MHz, CDCl<sub>3</sub>)  $\delta$  10.01 (br s, 1H), 8.83 (d,  $J$  = 7.8 Hz, 1H), 8.70 (dd,  $J$  = 4.2 Hz, 1.8 Hz, 1H), 8.13 (dd,  $J$  = 7.8 Hz, 1.2 Hz, 1H), 7.85-7.84 (m, 1H), 7.66 (d,  $J$  = 1.8 Hz, 1H), 7.62-7.57 (m, 2H), 7.55-7.47 (m, 3H), 7.41-7.39 (m, 1H), 6.042-6.04 (m, 1H), 2.18 (s, 3H), <sup>13</sup>C{H} NMR (150 MHz, CDCl<sub>3</sub>)  $\delta$  166.0, 150.9, 148.3, 138.7, 138.2, 136.3, 134.8, 132.2, 131.6, 131.5, 129.8, 128.1, 128.0, 127.4, 125.9, 122.1, 121.8, 116.9, 107.7, 13.8; FT-

IR (neat) 1676, 1524, 1485, 1326, 1265, 1129, 948, 826  $\text{cm}^{-1}$ . HRMS (ESI)  $m/z$ :  $[M+H]^+$  calcd for  $\text{C}_{20}\text{H}_{16}\text{N}_4\text{O}$  329.1402, found 329.1403.

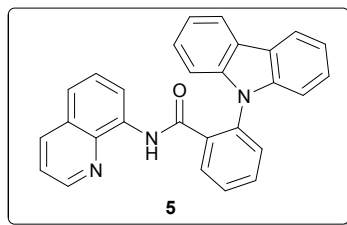

**2-(9H-Carbazol-9-yl)-N-(quinolin-8-yl)benzamide 5.** Analytical TLC on silica gel, 1:9 ethyl acetate/hexane  $R_f = 0.40$ ; white solid; 34 mg, yield 41%; mp 184-185  $^{\circ}\text{C}$ ;  $^1\text{H}$  NMR (600 MHz,  $\text{CDCl}_3$ )  $\delta$  10.46 (br s, 1H), 8.62-8.61 (m, 1H), 8.41 (dd,  $J = 7.8$  Hz, 1.8 Hz, 1H), 8.02 (d,  $J = 7.2$  Hz, 2H), 7.87 (dd,  $J = 8.4$  Hz, 1.2 Hz, 1H), 7.71-7.68 (m, 3H), 7.49 (dd,  $J = 7.8$  Hz, 1.2 Hz, 1H), 7.40-7.33 (m, 5H), 7.29 (d,  $J = 8.4$  Hz, 1H), 7.24 (td,  $J = 7.8$  Hz, 1.2 Hz, 2H), 7.11-7.09 (m, 1H);  $^{13}\text{C}\{\text{H}\}$  NMR (150 MHz,  $\text{CDCl}_3$ )  $\delta$  164.2, 147.5, 142.1, 138.2, 135.7, 135.6, 134.4, 132.9, 132.1, 129.7, 129.0, 127.5, 127.1, 126.5, 124.7, 121.6, 121.3, 120.6, 120.3, 116.4, 110.5; FT-IR (KBr) 3320, 1669, 1527, 1451, 1259, 920, 822  $\text{cm}^{-1}$ . HRMS (ESI)  $m/z$ :  $[M+H]^+$  calcd for  $\text{C}_{28}\text{H}_{19}\text{N}_3\text{O}$  414.1606, found 414.1614.

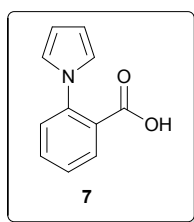

**2-(1H-Pyrrol-1-yl)benzoic acid 7.** Analytical TLC on silica gel, 9:1 ethyl acetate/hexane  $R_f = 0.25$ ; pale brown solid; 31 mg, yield 84%; mp 96-97  $^{\circ}\text{C}$ ;  $^1\text{H}$  NMR (600 MHz,  $\text{CDCl}_3$ )  $\delta$  7.95-7.94 (m, 1H), 7.16 (td,  $J = 7.2$  Hz, 1.2 Hz, 1H), 7.44 (t,  $J = 7.2$  Hz, 1H), 7.40 (d,  $J = 7.8$  Hz, 1H), 6.85-6.84 (m, 2H), 6.33-6.32 (m, 2H);  $^{13}\text{C}\{\text{H}\}$  NMR (150 MHz,  $\text{CDCl}_3$ )  $\delta$  170.1, 141.1, 133.3, 131.6, 127.4, 127.3, 126.5, 122.3, 110.1; FT-IR (KBr) 1670, 1600, 1499, 1407, 1303, 1263, 1078, 942  $\text{cm}^{-1}$ . HRMS (ESI)  $m/z$ :  $[M+H]^+$  calcd for  $\text{C}_{11}\text{H}_{10}\text{NO}_2$  188.0712, found 188.0712.



## References

1. W. L. F. Armarego and C. L. L. Chai, In *Purification of Laboratory Chemicals*, Sixth Edition, Elsevier's Science and Technology, UK, 2009, 428-429.
2. B. S. Furniss, A. J. Hannaford, P. W. G. Smith and A. R. Tatchell, In *Vogel's Textbook of Practical Organic Chemistry*, Fifth Edition, Pearson Education Pte. Ltd., Indian Branch, Delhi, 2004, 928-929.
3. (a) Y. Aihara and N. Chatani, *J. Am. Chem. Soc.*, 2013, **135**, 5308; (b) Y. Ano, M. Tobisu and N. Chatani, *Org. Lett.*, 2012, **14**, 354.
4. S. Chiba, Y. Wang, G. Lapointe and K. Narasaka, *Org. Lett.*, 2008, **10**, 313.
5. T. D. Montgomery, A. E. Nibbs, Y. Zhu and V. H. Rawal, *Org. Lett.* 2014, **16**, 3480.

## NMR Spectra ( $^1\text{H}$ and $^{13}\text{C}$ )

SP-Ph-9feb\_1H

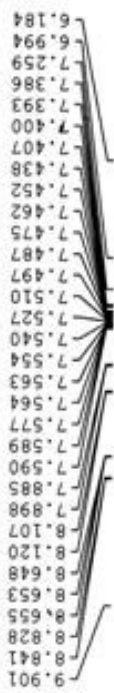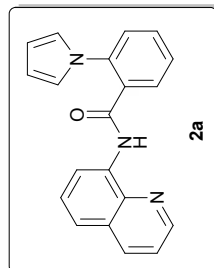

Current Data Parameters  
NAME SP-Ph-9feb\_1H  
PROCNO 1

F2 - Acquisition Parameters  
Date\_ 2010209  
Time 11:05  
INSTRUM spect  
PROBHD 5 mm BBOBO BB7  
PULPROG zgpg30  
TD 32768  
SOLVENT CDCl3  
DS 4  
SWH 12019.230 Hz  
FIDRES 0.346798 Hz  
AQ 1.963489 sec  
RG 41.400  
WM 41.400 mmk  
DE 6.50 umk  
TE 297.9 K  
SI 1  
F1 1.00000000 sec

===== CHANNEL f1 =====  
SFO1 400.137963 MHz  
NUC1 13C  
P1 13.00 usec  
PL1 0.00 dB  
SFO2 400.137963 MHz  
NUC2 13C  
P2 13.00 usec  
PL2 0.00 dB

F2 - Processing parameters  
SI 16384  
SF 600.1701144 MHz  
WDW EM  
SSB 0  
GB 0  
PC 1.00

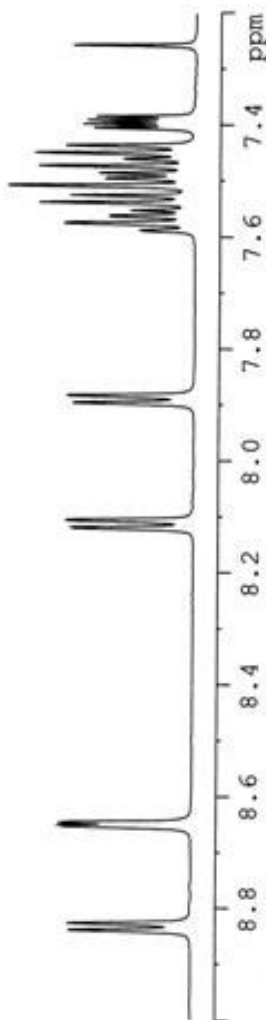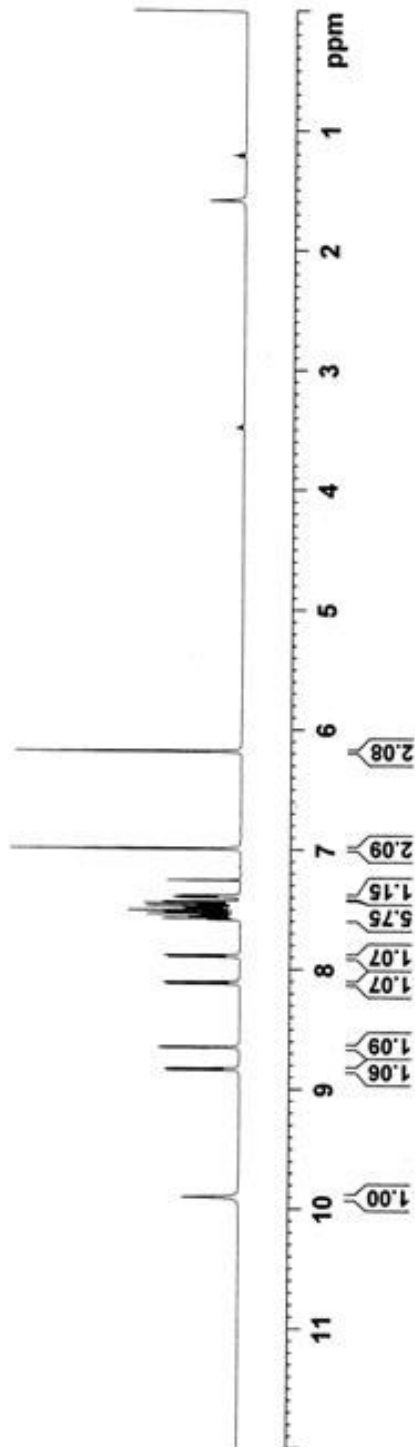

SP-PY-07-12-14\_13C

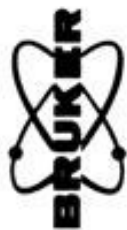

Current Data Parameters  
NAME SP-PY-07-12-14\_13C  
EXPNO 1  
PROCNO 1

F2 - Acquisition Parameters  
Date\_ 20141209  
Time\_ 12.09  
INSTRUM spect  
PROBHD 5 mm PABBO BB/  
PULPROG zgpg30  
TD 32768  
SOLVENT CDCl3  
NS 1185  
DS 2  
SWH 36057.691 Hz  
FIDRES 1.100393 Hz  
AQ 0.4543829 sec  
RG 65.24  
DM 13.867 usec  
DE 6.50 usec  
TE 298.9 K  
D1 2.00000000 sec  
D11 0.03000000 sec  
TD0 1

===== CHANNEL f1 =====  
SFO1 150.9279571 MHz  
NUC1 13C  
P1 10.50 usec  
PLW1 95.00000000 W

===== CHANNEL f2 =====  
SFO2 600.1724007 MHz  
NUC2 1H  
CFPRG12 walzr16  
PCPD2 70.00 usec  
PLW2 21.00000000 W  
PLW12 0.61714000 W  
PLW13 0.30239999 W

F2 - Processing parameters  
SI 16384  
SF 150.9128342 MHz  
WDW EM  
SSB 0  
LB 1.00 Hz  
GB 0  
PC 1.40

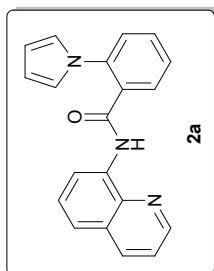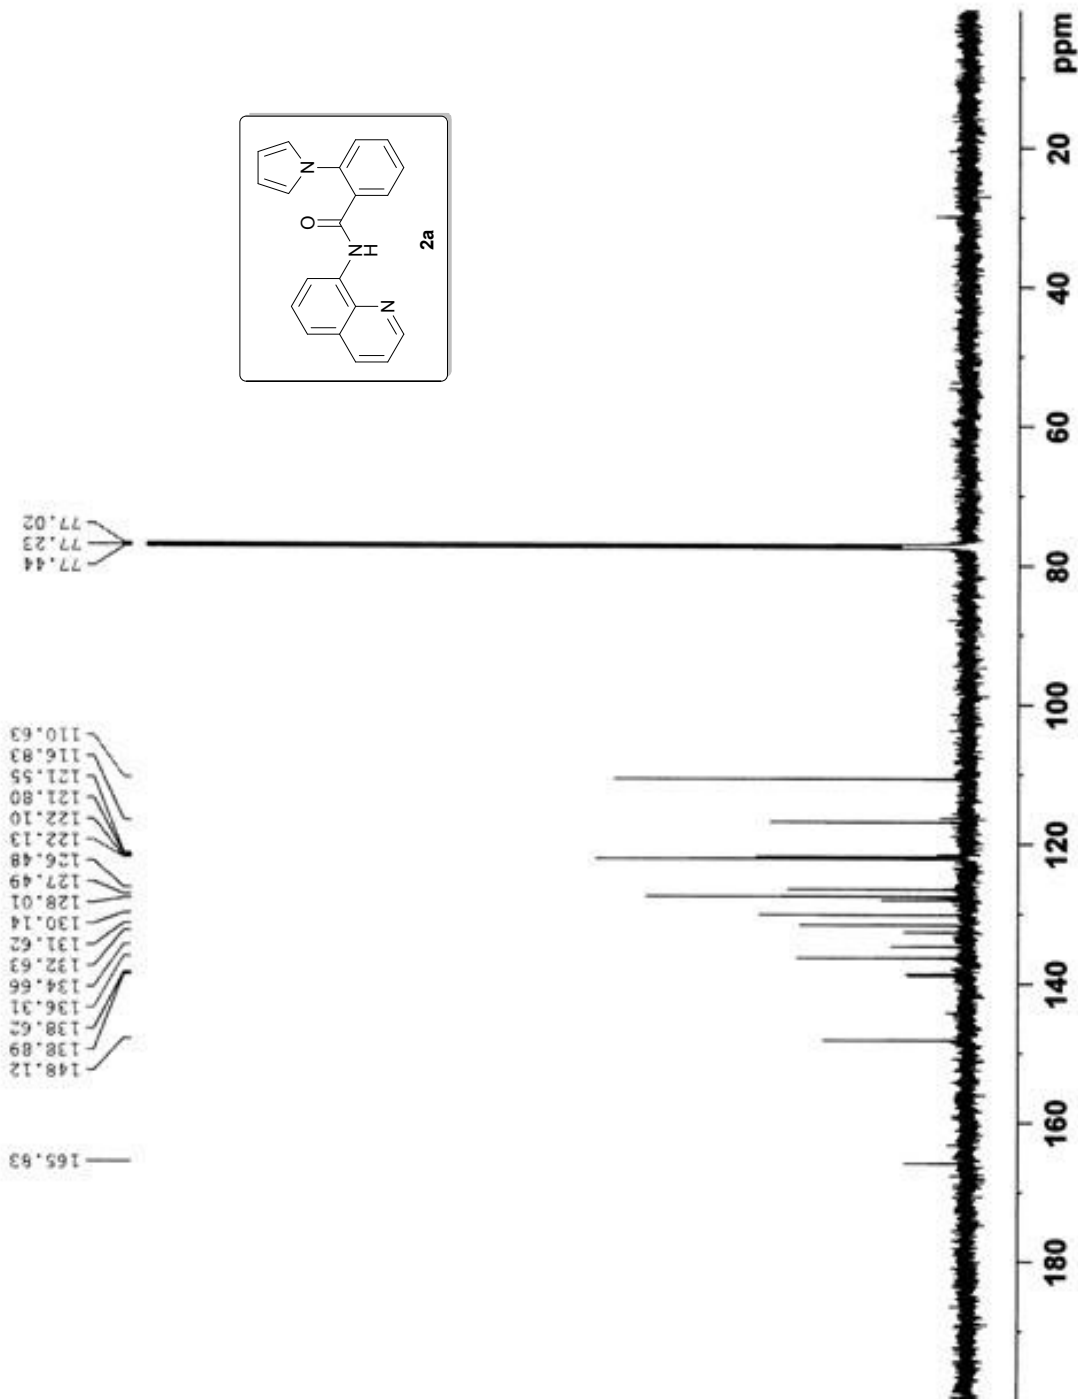

SP-679-3, 4-1H

9.721  
8.924  
8.822  
8.812  
8.809  
8.680  
8.677  
8.672  
8.670  
8.132  
8.129  
8.117  
8.115  
7.554  
7.541  
7.528  
7.518  
7.516  
7.505  
7.503  
7.431  
7.418  
7.411  
7.405  
7.398  
7.390  
7.287  
7.281  
7.274  
7.268  
7.260  
6.996  
6.993  
6.989  
6.098  
6.095  
6.091

0.003  
2.522

Current Data Parameters  
NAME SP-679-3, 4-1H  
EXPNO 1  
PROCNO 1  
F2 - Acquisition Parameters  
Date\_ 20101003  
Time 10:05  
INSTRUM spect  
PROBHD 5 mm PABBO  
PULPROG zgpg30  
TD 32768  
SOLVENT CDCl3  
NS 16  
DS 2  
SWH 12019.212 Hz  
FIDRES 0.365796 Hz  
AQ 1.3631488 sec  
RG 133  
DM 41.90 usec  
DE 2.70 usec  
TE 300.2 K  
D1 1.00000000 sec  
TD0 1  
----- CHANNEL f1 -----  
NUC1 609.1701313 MHz  
P1 12.00 usec  
PL1 21.00000000 W  
F2 - Processing parameters  
SI 24384  
SF 609.1701313 MHz  
WDW 0  
SSB 0  
LB 0.30 Hz  
GB 0  
PC 1.00

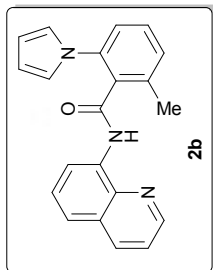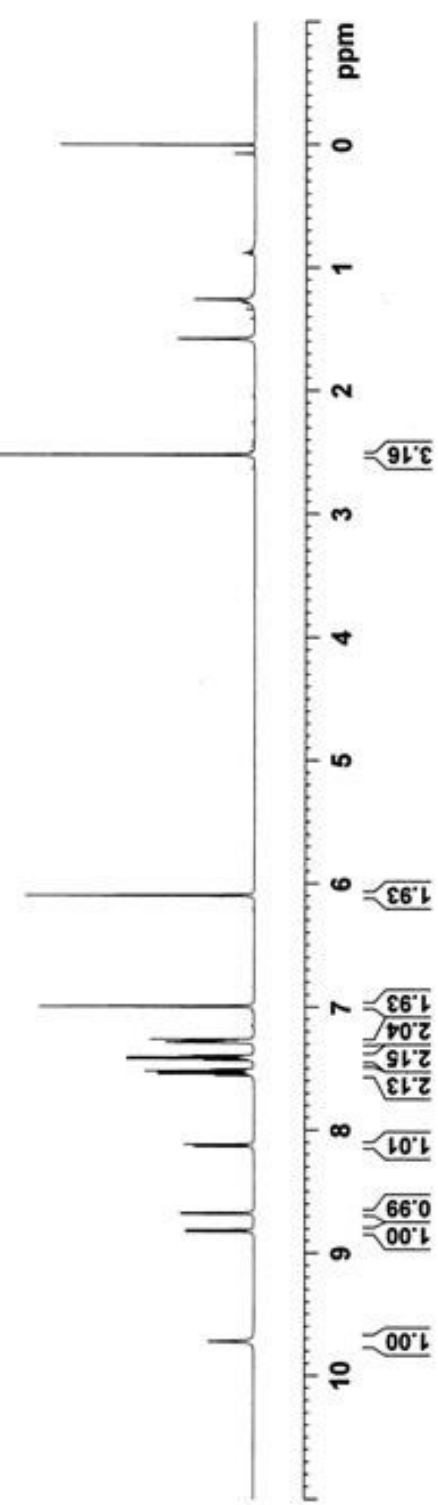

SP-679-3, 4-13C

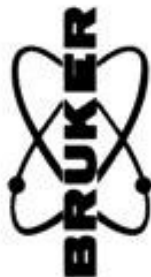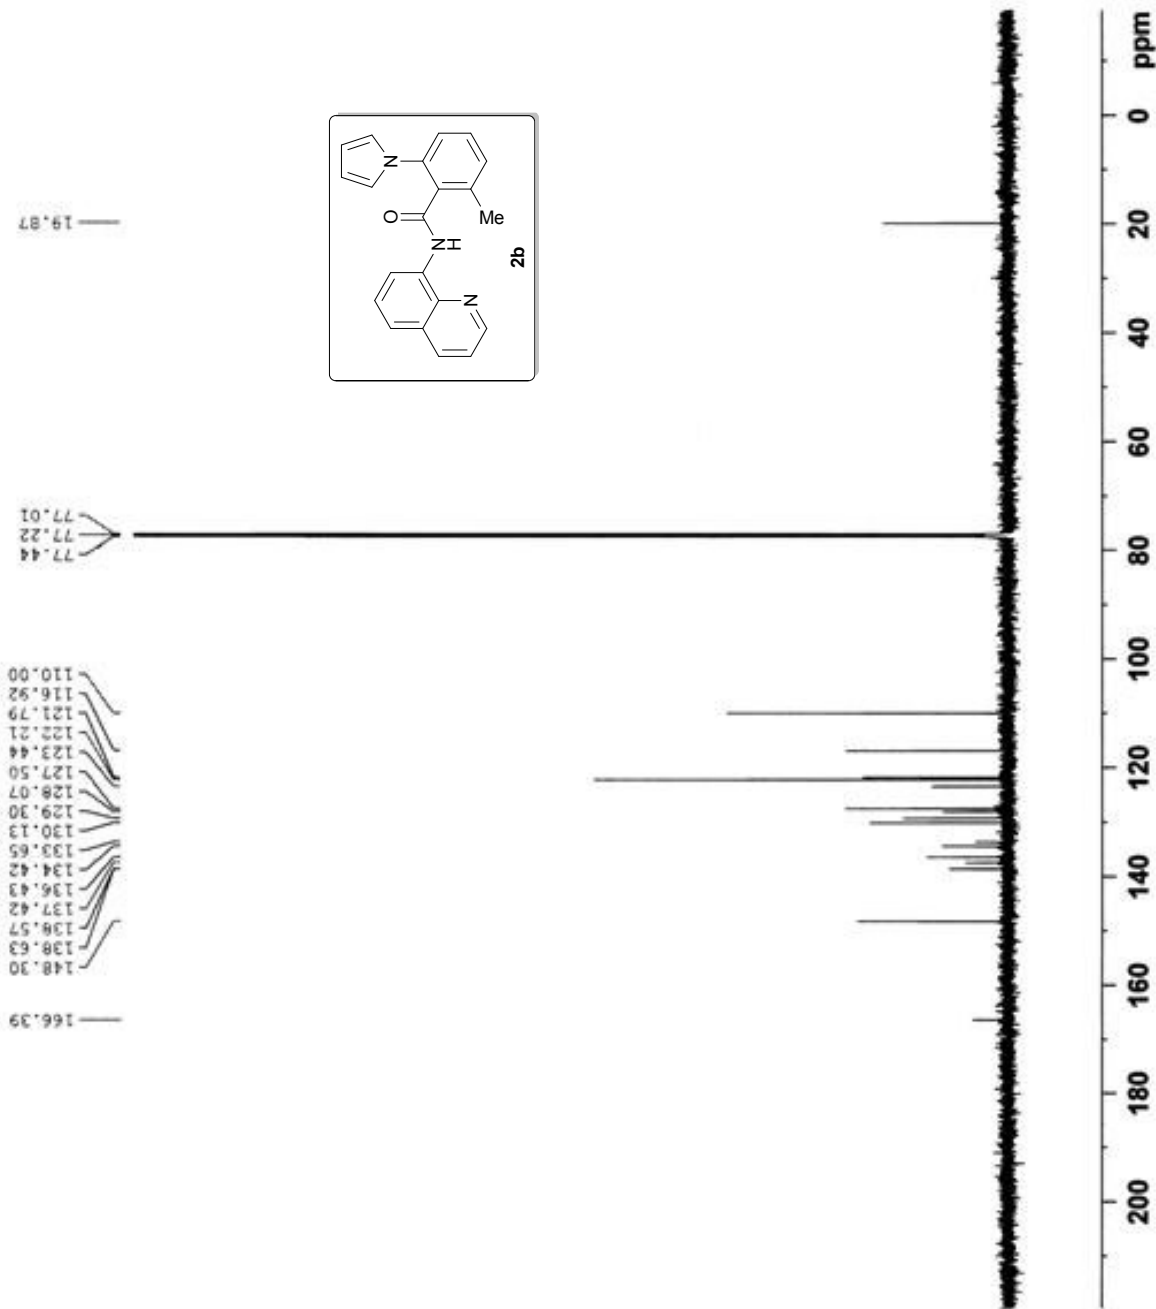

Current Data Parameters  
NAME SP-679-3, 4-13C  
EXPNO 1  
PROCNO 1

F2 - Acquisition Parameters  
Date\_ 20150305  
Time\_ 10.12  
INSTRUM spect  
PROBHD 5 mm PABBO BB/  
PULPROG zgpg30  
TD 32768  
SOLVENT CDCl3  
NS 218  
DS 2  
SWH 36057.691 Hz  
FIDRES 1.100393 Hz  
AQ 0.4543829 sec  
RG 65.24  
DM 13.867 usec  
DE 6.50 usec  
TE 298.5 K  
D1 2.00000000 sec  
D11 0.03000000 sec  
TDO 1

===== CHANNEL f1 =====  
SFO1 150.9279571 MHz  
NUC1 13C  
P1 10.50 usec  
PLW1 95.00000000 W

===== CHANNEL f2 =====  
SFO2 600.1724007 MHz  
NUC2 1H  
CPDPRG2 waltz16  
PCPD2 70.00 usec  
PLW2 21.00000000 W  
PLW12 0.61714000 W  
PLW13 0.30239999 W

F2 - Processing parameters  
SI 16384  
SF 150.9128359 MHz  
WDW EM  
SSB 0  
LB 1.00 Hz  
GB 0  
PC 1.40

SP-763-3CL-1H

Current Data Parameters  
NAME SP-763-3CL-1H  
EXPNO 1  
PROCNO 1  
F2 - Acquisition Parameters  
Date\_ 20150711  
Time 14:21  
INSTRUM spect  
PROBHD 5 mm PABBO BBI  
PULPROG zg30  
TD 32768  
SOLVENT CDCl3  
NS 16  
DS 4  
SWH 12019.730 Hz  
FIDRES 0.364798 Hz  
AQ 1.3631488 sec  
RG 82.0  
DM 41.600 usec  
DE 6.50 usec  
TE 300.2 K  
SI 1.0000000 sec  
VFO 1  
\*\*\*\*\* CHANNEL f1 \*\*\*\*\*  
SFO1 600.1377043 MHz  
PC1 12.00 usec  
PL1 0.00  
PLM1 21.00000000 M  
F2 - Processing parameters  
SI 16384  
SF 600.1370149 MHz  
WDW EM  
SSB 0  
LB 0.20 Hz  
GB 0  
PC 1.00

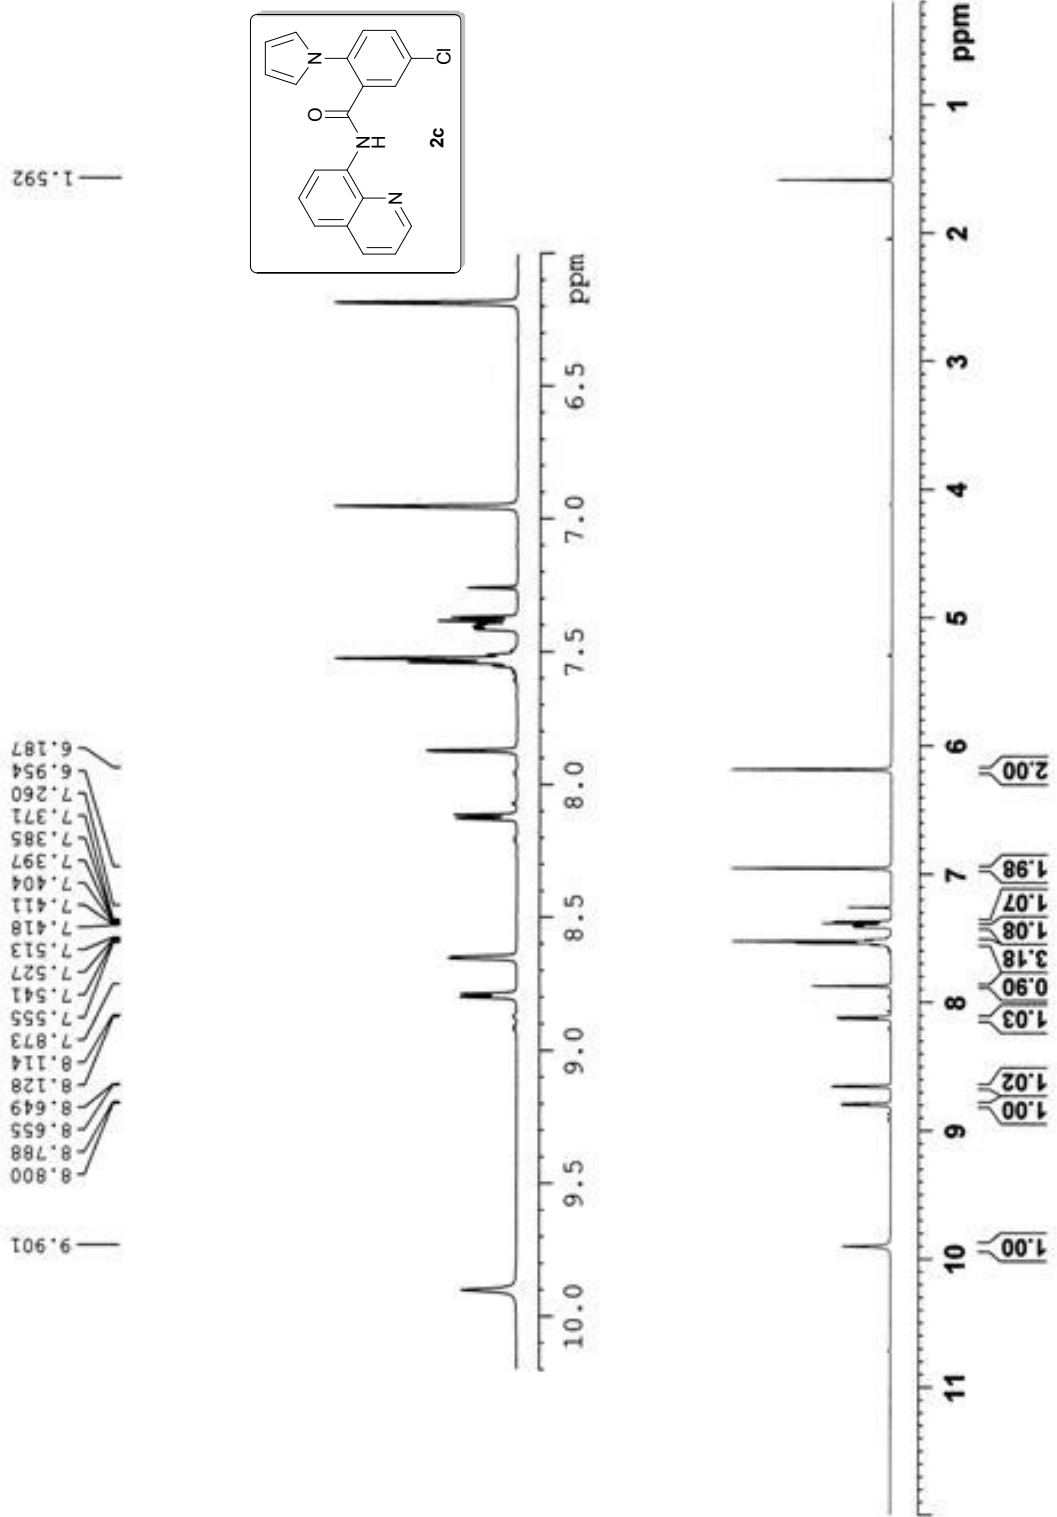

763-3C1-13C

164.24

148.18  
138.50  
137.31  
136.32  
134.29  
133.70  
133.30  
131.58  
130.12  
127.96  
127.77  
127.43  
122.37  
122.07  
121.88  
116.92  
110.99

77.43  
77.21  
77.00

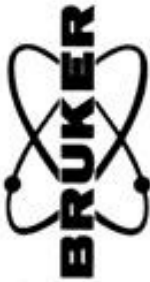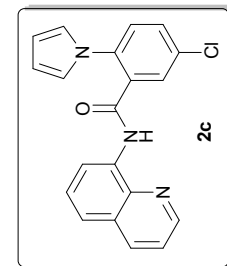

Current Data Parameters  
NAME SF-763-3C1-13C  
EXPNO 1  
PROCNO 1

F2 - Acquisition Parameters  
Date\_ 20150722  
Time\_ 14.22  
INSTRUM spect  
PROBHD 5 mm PABBO BB7  
PULPROG zgpg30  
TD 32768  
SOLVENT CDC13  
NS 346  
DS 2  
SWH 42613.637 Hz  
FIDRES 1.300465 Hz  
AQ 0.3844779 sec  
RG 65.24  
DM 11.733 usec  
DE 6.50 usec  
TE 295.0 K  
D1 2.00000000 sec  
D11 0.03000000 sec  
TD0 1

\*\*\*\*\* CHANNEL f1 \*\*\*\*\*  
SF01 150.9279571 MHz  
NUC1 13C  
P1 10.50 usec  
PLM1 95.00000000 W

\*\*\*\*\* CHANNEL f2 \*\*\*\*\*  
SF02 600.1724007 MHz  
NUC2 1H  
CROSSP12 waltz16  
PCPD2 70.00 usec  
PLM2 21.00000000 W  
PLM12 0.61714060 W  
PLM13 0.30239999 W

F2 Processing parameters  
SI 1  
SF 150.9128396 MHz  
ETM EM  
KTM 0  
SBB 0  
GB 0  
PC 1.40

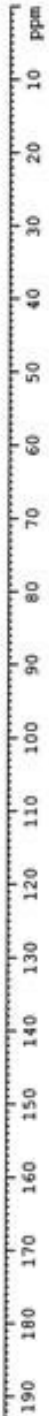



SP-673-ME-1-1H

9.866  
8.829  
8.817  
8.652  
8.646  
8.119  
8.106  
7.689  
7.549  
7.536  
7.523  
7.505  
7.492  
7.406  
7.399  
7.393  
7.386  
7.376  
7.363  
7.330  
7.317  
7.260  
6.960  
6.160

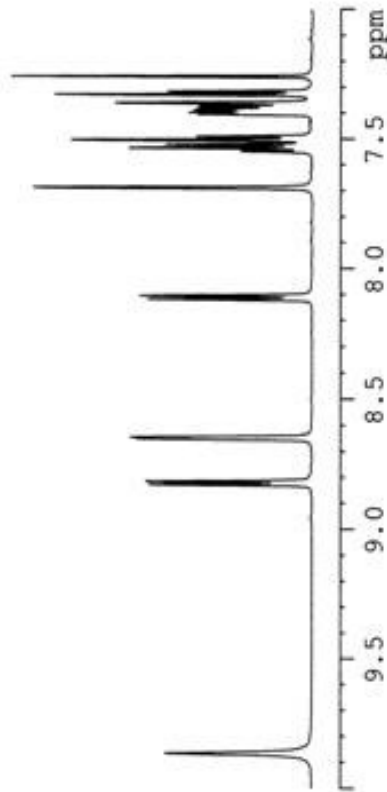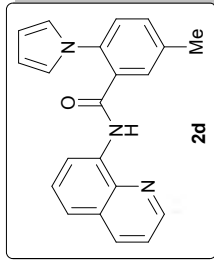

2.465

Current Data Parameters  
NAME SP-673-ME-1-1H  
EXPNO 1  
PROCNO 1  
F2 - Acquisition Parameters  
Date\_ 2015093  
Time 13.42  
INSTRUM spect  
PROBHD 5 mm PABBO BB7  
PULPROG zgpg30  
TD 32768  
SFO 400.15147  
CQ 14  
DE 14  
DS 2  
SWH 12019.230 Hz  
FIDRES 0.366798 Hz  
AQ 1.3431488 sec  
RG 655  
ZM 42.600 usec  
DE 6.470 usec  
TE 293.2 K  
TL 1.00000000 sec  
TD 1  
\*\*\*\*\* CHANNEL f1 \*\*\*\*\*  
SFO1 400.15147 MHz  
NUC1 1H  
P1 12.00 usec  
PL1 21.00000000 M  
F2 - Processing parameters  
SI 655  
SF 400.1505147 MHz  
WDW EM  
SSB 0  
LB 0  
GB 0  
PC 1.00

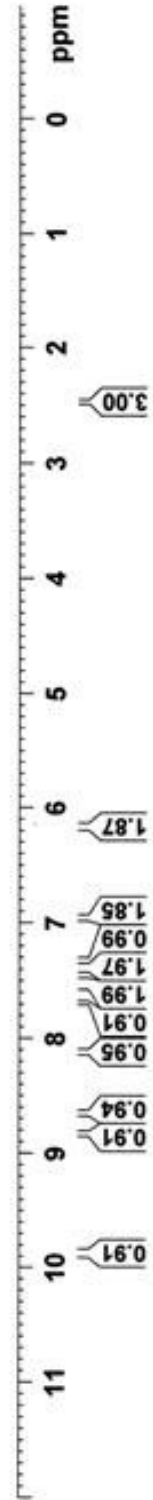

SP-673-13C

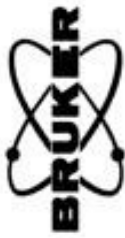

Current Data Parameters  
NAME SP-673-13C  
EXPNO 1  
PROCNO 1

F2 - Acquisition Parameters

Date\_ 20150302  
Time\_ 19.19  
INSTRUM spect  
PROBHD 5 mm F4BBO BB/  
PULPROG zgpg30  
TD 32768  
SOLVENT CDCl3  
NS 54  
DS 2  
SWH 36057.691 Hz  
FIDRES 1.100393 Hz  
AQ 0.4543829 sec  
RG 200.18  
DM 13.867 usec  
DE 6.50 usec  
TE 297.3 K  
D1 2.00000000 sec  
D11 0.03000000 sec  
TD0 1

\*\*\*\*\* CHANNEL f1 \*\*\*\*\*  
SFO1 150.9279571 MHz  
NUC1 13C  
P1 10.50 usec  
PLM1 95.00000000 W

\*\*\*\*\* CHANNEL f2 \*\*\*\*\*  
SFO2 600.1724007 MHz  
NUC2 1H  
P2 10.50 usec  
PLM2 95.00000000 W

F2 - Processing parameters  
SI 16384  
SF 150.9128367 MHz  
WDW EM  
SSB 0  
LB 0  
GB 0  
PC 1.40

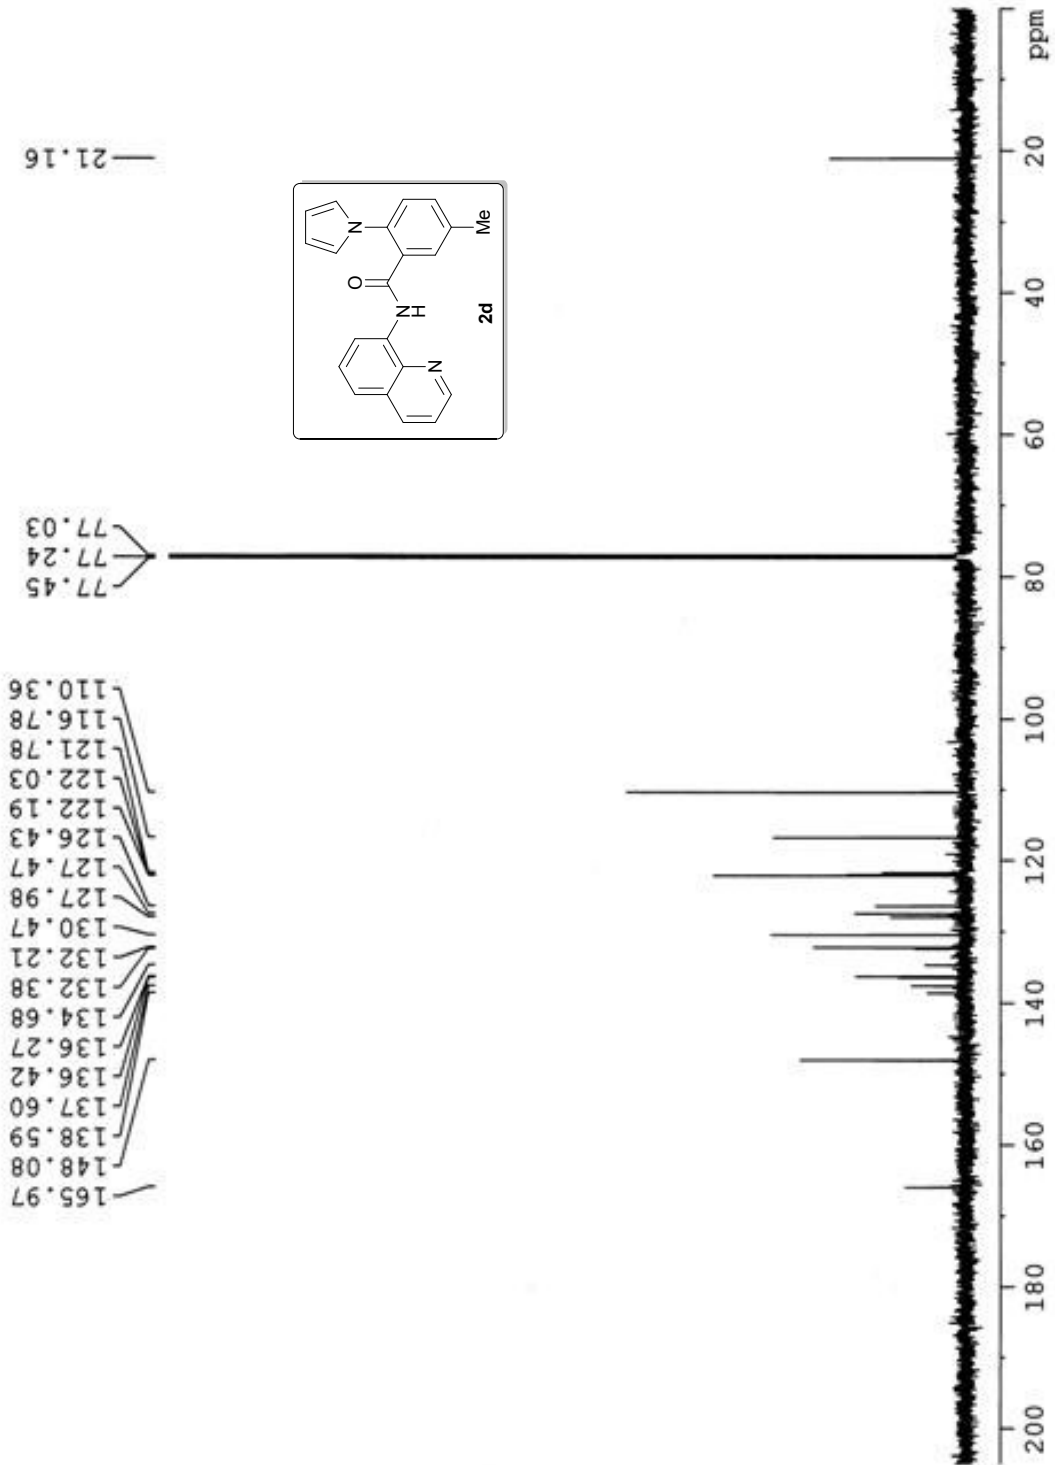

SP-4Cl-1H

9.901  
8.807  
8.795  
8.638  
8.634  
8.124  
8.110  
7.852  
7.838  
7.552  
7.539  
7.519  
7.505  
7.451  
7.441  
7.411  
7.405  
7.398  
7.391  
7.259  
6.972  
6.192

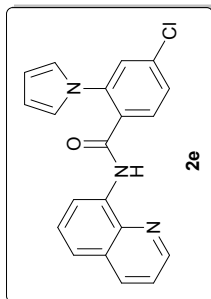

Current Data Parameters  
NAME SP-4Cl-1H  
EXPNO 1  
PROCNO 1

F2 - Acquisition Parameters  
Date\_ 20180717  
Time 9.30  
INSTRUM spect  
PROBHD 5 mm F4000 BBI  
PULPROG zg30  
TD 32768  
SOLVENT CDCl3  
AQ 1.3631488 sec  
RG 655  
DE 41.400 usec  
TE 293.2 K  
SI 1.00000000 sec  
TD0 1

===== CHANNEL f1 =====  
SFO1 400.1737043 MHz  
NUC1 1H  
P1 12.00 usec  
PL1 21.00000000 M  
F2 - Processing parameters  
SI 16384  
SF 400.1700149 MHz  
WDW EM  
SSB 0  
GB 0  
PC 1.00

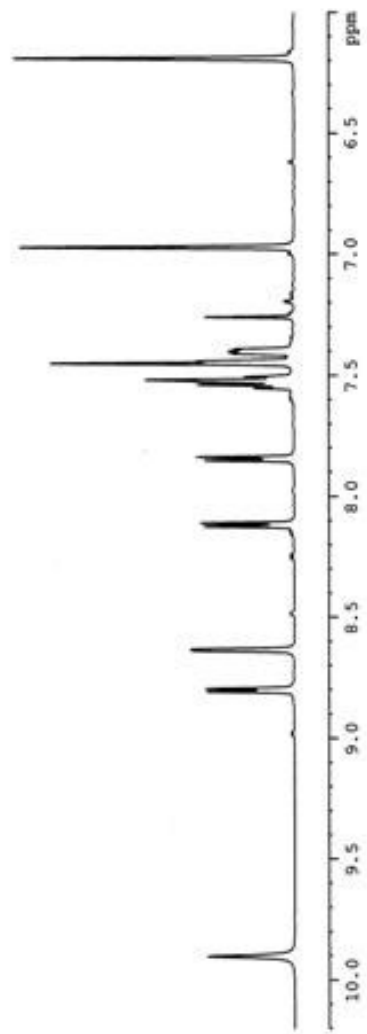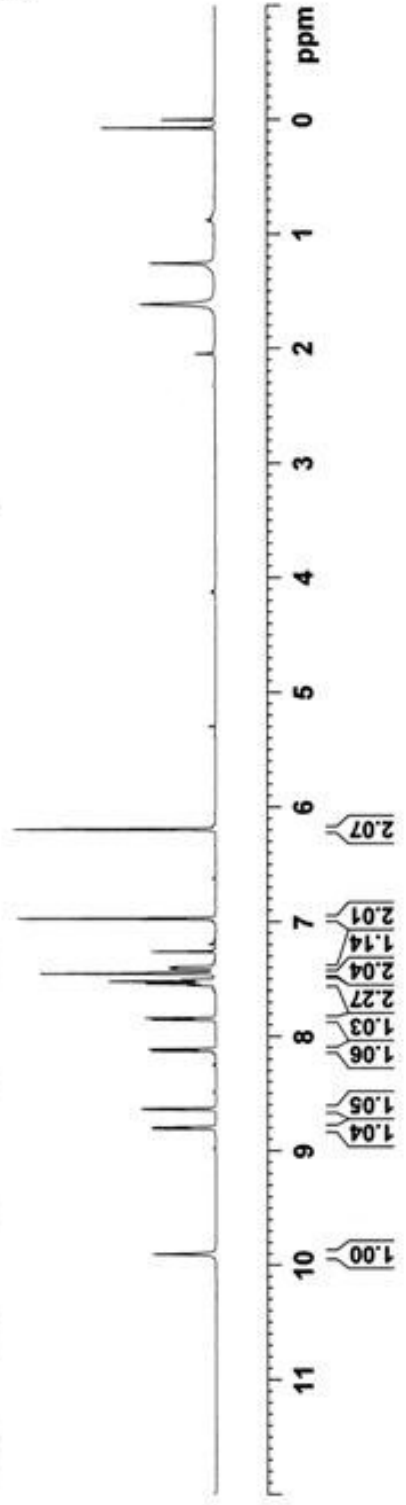

SP-763-4-Cl-13C

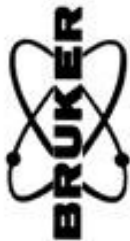

Current Data Parameters  
NAME SP-763-4-Cl-13C  
EXPNO 1  
PROCNO 1

F2 - Acquisition Parameters  
Date\_ 20150826  
Time 8.15  
INSTRUM spect  
PROBHD 5 mm PABBO BB/  
PULPROG zgpg30  
TD 32768  
SOLVENT CDCl3  
NS 240  
DS 2  
SWH 42613.637 Hz  
FIDRES 1.300465 Hz  
AQ 0.3844779 sec  
RG 200.718  
DM 11.718 usec  
DE 11.440 usec  
TE 300.2 K  
D1 2.00000000 sec  
D11 0.03000000 sec  
TD0 1

\*\*\*\*\* CHANNEL f1 \*\*\*\*\*  
SFO1 150.9279571 MHz  
NUC1 13C  
P1 10.50 usec  
PLA1 95.0000000 M

\*\*\*\*\* CHANNEL f2 \*\*\*\*\*  
SFO2 600.1724007 MHz  
NUC2 1H  
CDEPRG12 waltz16  
PCPD2 70.00 usec  
PLA2 21.0000000 M  
PLM12 0.61714000 M  
PLM13 0.30239999 M

F2 - Processing parameters  
SI 14384  
SF 150.9128377 MHz  
WDW EM  
SSB 0  
LB 1.00 Hz  
GB 0  
PC 1.40

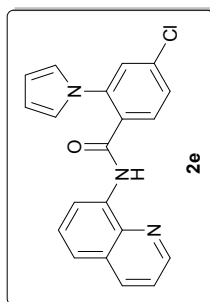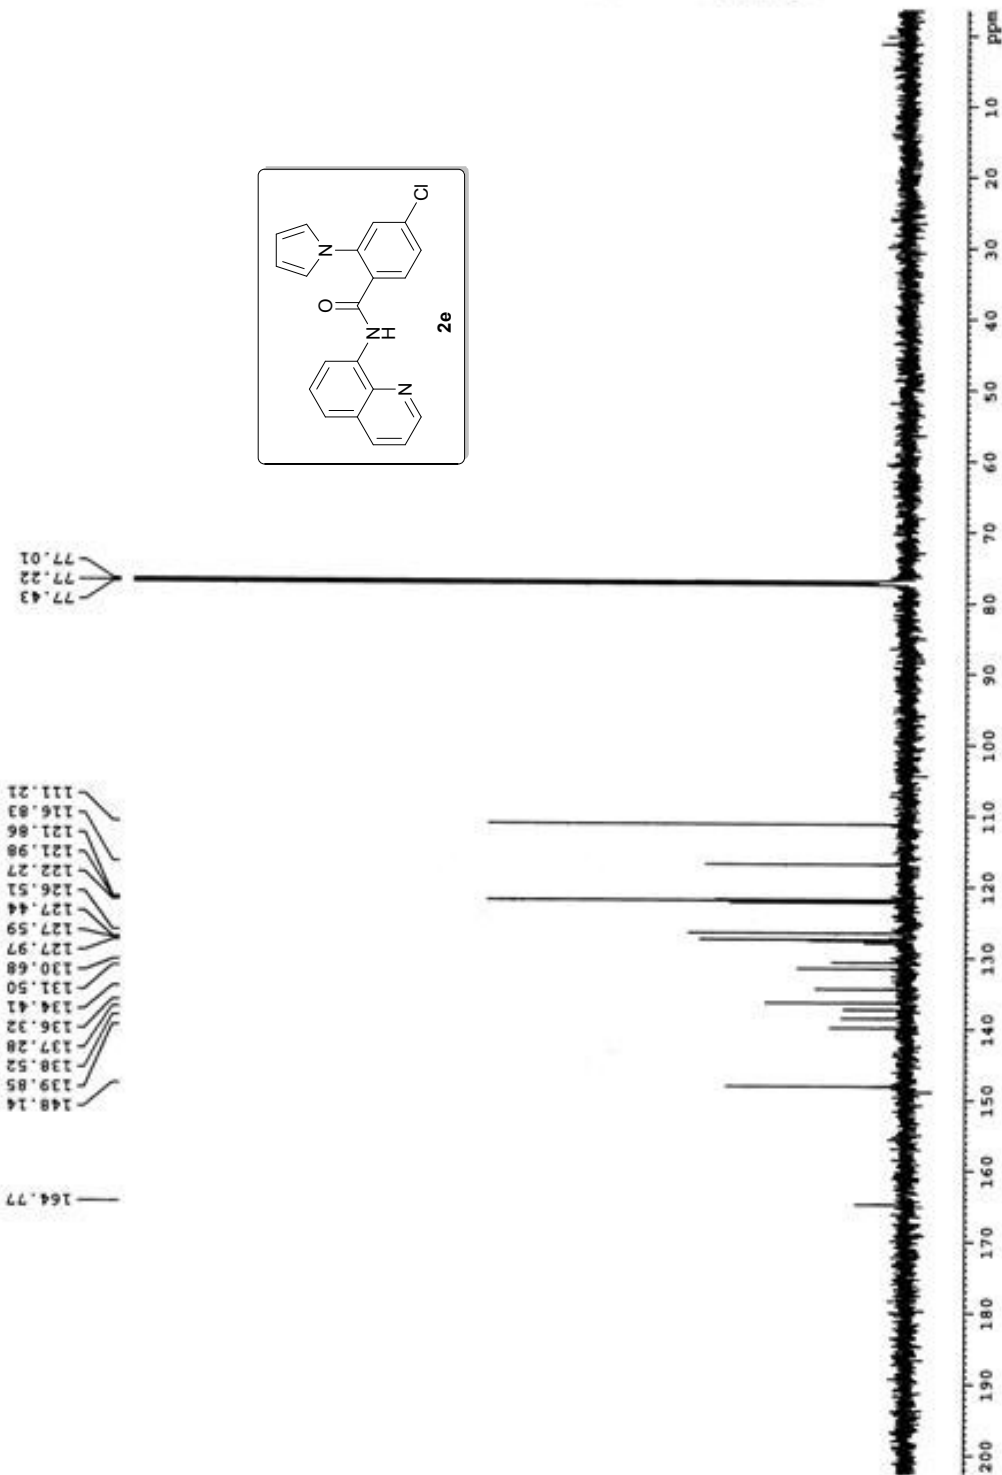

SP-797-4I-1H

```

Output Data Parameters
NAME SP-797-4I-1H
EXPNO 1
PROCNO 1
F2 - Acquisition Parameters
Date_ 20150826
Time 8.32
INSTRUM spect
PROBHD 5 mm PALMS
PULPROG zgpg30
TD 32768
SOLVENT CDCl3
NS 16
DS 2
SWH 12018.330 Hz
FIDRES 0.364730 Hz
AQ 1.3631488 sec
RG 141.33
DM 41.650 umec
DE 6.50 umec
TE 295.2 K
D1 1.0000000 sec
TD0 1
***** CHANNEL f1 *****
SFO1 400.137041 MHz
PC1 13.00 umec
PLM1 21.0000000 W
F2 - Processing parameters
SI 16384
SF 400.137041 MHz
WDW EM
SSB 0
LB 0.30 Hz
GB 0
PC 1.00
  
```

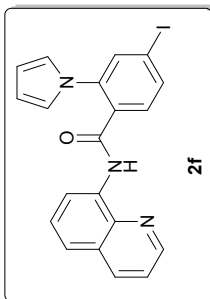

9.899  
8.801  
8.789  
8.637  
8.635  
8.632  
8.123  
8.109  
7.816  
7.806  
7.620  
7.606  
7.549  
7.535  
7.517  
7.504  
7.410  
7.402  
7.396  
7.391  
7.260  
6.962  
6.185

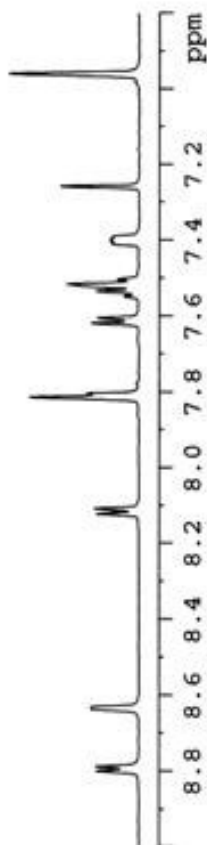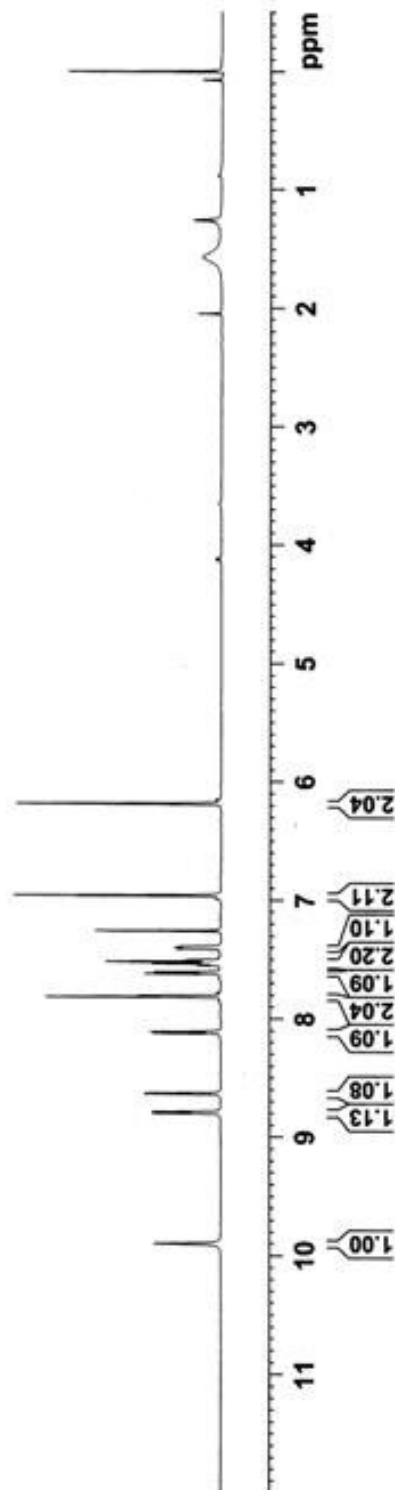

SP-763-I-13C

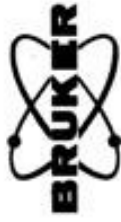

Current Data Parameters  
NAME SP-763-I-13C  
EXPNO 1  
PROCNO 1

F2 - Acquisition Parameters  
Date\_ 20150722  
Time 14.11  
INSTRUM spect  
PROBHD 5 mm PABBO B1  
PULPROG zgpg30  
TD 32768  
SOLVENT CHCl3  
NS 510  
DS 4  
SWH 43413.437 Hz  
FIDRES 1.106445 Hz  
AQ 0.3444779 sec  
RG 65.24  
ZM 11.733 usec  
DE 6.50 usec  
TE 303.2 K  
D1 2.0000000 sec  
D11 0.0300000 sec  
TD0 1

===== CHANNEL f1 =====  
SF01 150.9279571 MHz  
PC 10.50  
F1 10.50 usec  
F2 95.00000000 M

===== CHANNEL f2 =====  
SF02 400.1724007 MHz  
NUC2 13  
CROSSP2 waltz16  
PULPROG zgpg30  
PL1 21.00000000 usec  
PL12 0.41714000 M  
PL13 0.39239999 M

F2 - Processing Parameters  
SI 1684  
SF 150.9128131 MHz  
WDW EM  
SSB 0  
LB 0  
GB 0  
PC 1.40

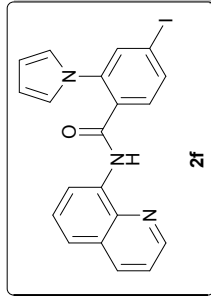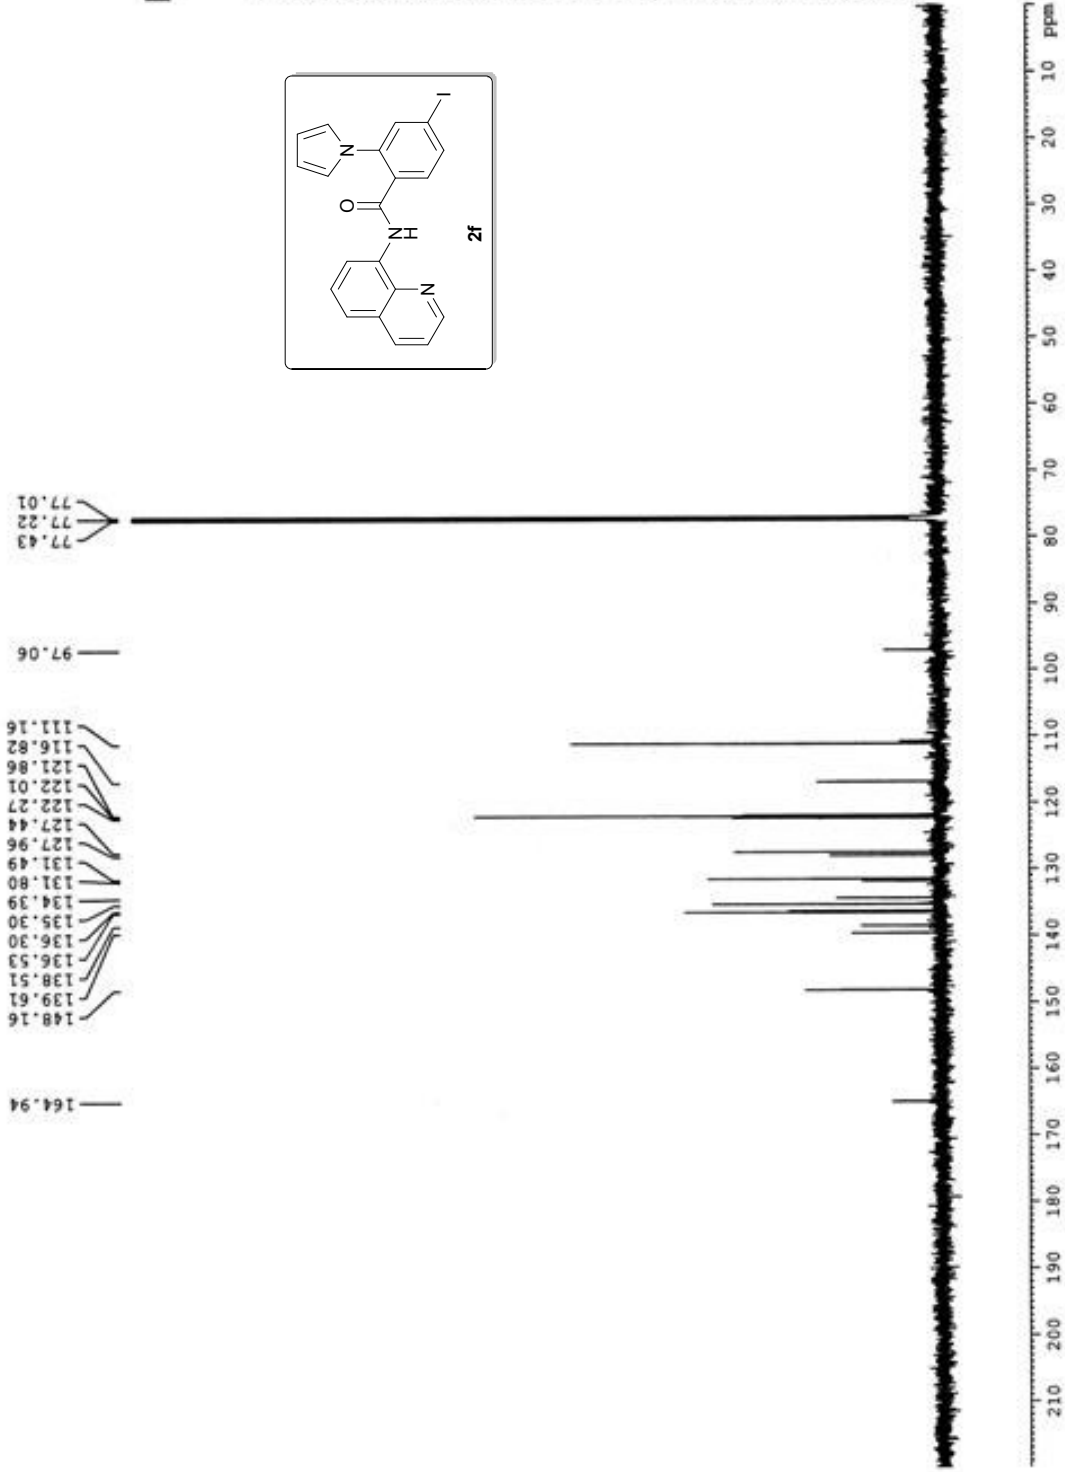

SP-676-1H

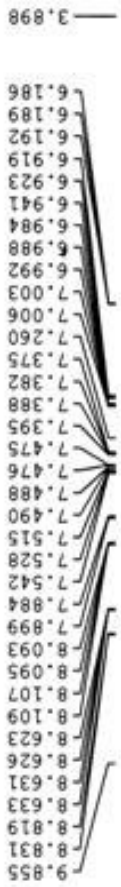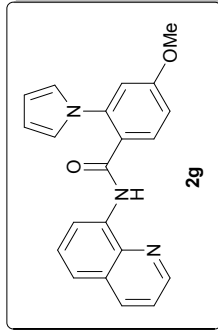

Current Data Parameters  
NAME SP-676-1H  
EXTNO 1  
PROCNO 1

F2 - Acquisition Parameters  
Date\_ 20150302  
Time 13.21  
INSTRUM spect  
PROBHD 5 mm PABBO  
PULPROG zgpg30  
TD 32768  
SOLVENT CDCl3  
NS 16  
DS 2  
SWH 12019.239 Hz  
FIDRES 0.56288 Hz  
AQ 1.7431488 sec  
RG 39.36  
SN 41.600 usec  
SC 6.40 usec  
TE 296.2 K  
SI 1.00000000 sec  
F1 100

\*\*\*\*\* CHANNEL f1 \*\*\*\*\*  
RF01 400.137043 MHz  
PC1 1H  
PI 12.00 usec  
PL1 21.00000000 M  
F2 - Processing parameters  
SI 400.1700138 MHz  
SF 400.1700138 MHz  
WDW EM  
SSB 0  
GB 0  
PC 1.00

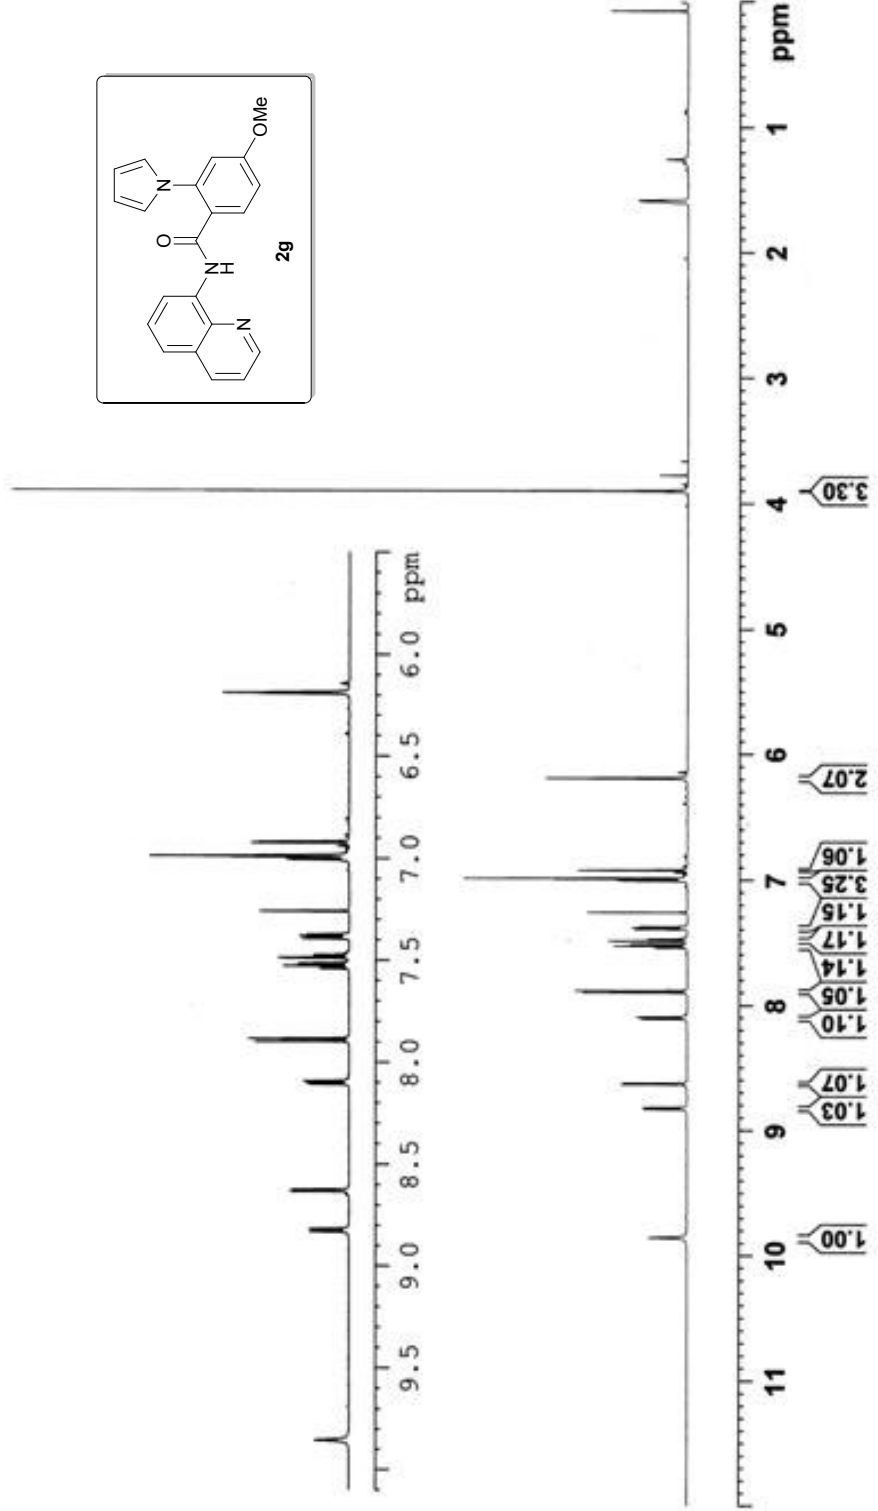

SP-676-13C

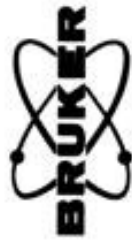

Current Data Parameters  
NAME SP-676-13C  
EXPNO 1  
PROCNO 1

F2 - Acquisition Parameters  
Date\_ 20150302  
Time\_ 19.09  
INSTRUM spect  
PROBHD 5 mm PASSED BB/  
PULPROG zgpg30  
TD 32768  
SOLVENT CDCl3  
NS 158  
DS 2  
SWH 36057.691 Hz  
FIDRES 1.100393 Hz  
AQ 0.4543829 sec  
RG 65.24  
DM 13.867 usec  
DE 6.50 usec  
TE 297.0 K  
D1 2.00000000 sec  
D11 0.03000000 sec  
TDO 1

----- CHANNEL f1 -----  
SFO1 150.9279571 MHz  
NUC1 13C  
P1 10.50 usec  
PLM1 95.00000000 W

----- CHANNEL f2 -----  
SFO2 600.1724007 MHz  
NUC2 1H  
CPDPRG2 waltz16  
PCPD2 70.00 usec  
PLM2 21.00000000 W  
PLM12 0.61714000 W  
PLM13 0.30239999 W

F2 - Processing parameters  
SI 16384  
SF 150.9128374 MHz  
WDW EM  
SSB 0  
LB 0  
GB 0  
PC 1.40

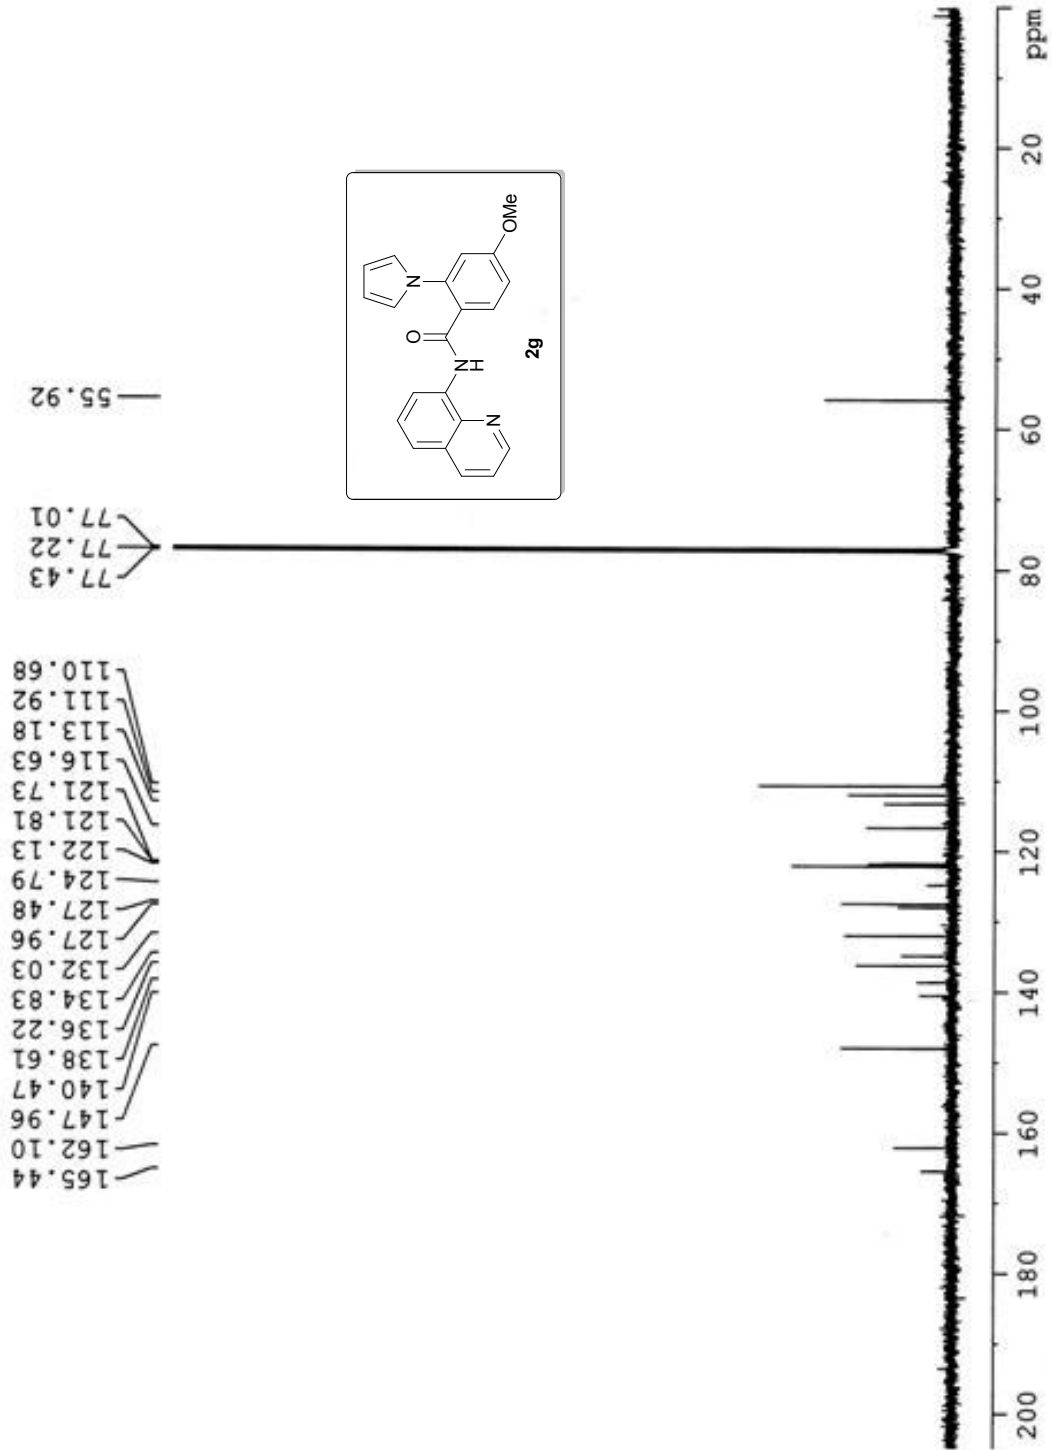



SP-PY-4ME-1H

9.888  
8.838  
8.826  
8.641  
8.640  
8.634  
8.107  
8.094  
7.813  
7.800  
7.544  
7.530  
7.517  
7.494  
7.480  
7.394  
7.388  
7.381  
7.374  
7.285  
7.272  
7.260  
7.244  
6.981  
6.180

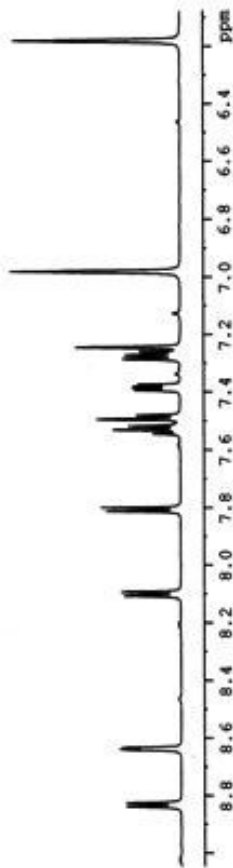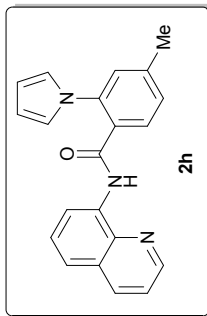

Current Data Parameters  
 NAME SP-PY-4ME-1H  
 EXPNO 1  
 PROCNO 1  
 F2 - Acquisition Parameters  
 Date\_ 20150223  
 Time 18.31  
 INSTRUM spect  
 PULPROG zgpg30  
 TD 32768  
 SFO 500.1350337  
 SOLVENT CDCl3  
 NS 16  
 DS 4  
 SWH 12019.218 Hz  
 FIDRES 0.364798 Hz  
 AQ 1.2631488 sec  
 RG 40.22  
 DW 41.600 usec  
 DE 2.000 usec  
 TE 297.5 K  
 D1 1.00000000 sec  
 TDO 1  
 ===== CHANNEL f1 =====  
 SFO1 600.1350337 MHz  
 NUC1 1H  
 P1 12.00 usec  
 PL1 21.00000000 W  
 F2 - Processing parameters  
 SI 16384  
 SF 600.1350337 MHz  
 SCW 0  
 LB 0  
 GB 0  
 PC 0.30 Hz  
 1.00

2.463  
0.006

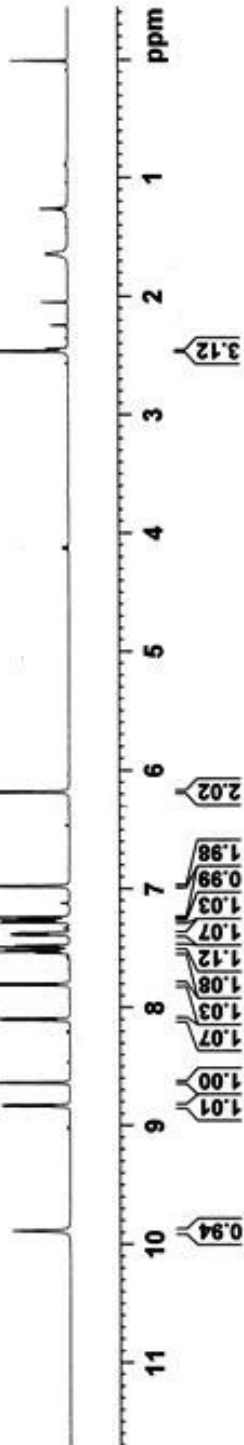

SP-PY-4ME-13C

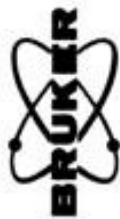

Current Data Parameters  
NAME SP-PY-4ME-13C  
EXPNO 1  
PROCNO 1

F2 - Acquisition Parameters  
Date\_ 20150221  
Time 18.38  
INSTRUM spect  
PROBHD 5 mm F4BG0 BB/  
PULPROG zgpg30  
TD 32768  
SOLVENT CDCl3  
NS 115  
DS 2  
SWH 36037.691 Hz  
FIDRES 1.100393 Hz  
AQ 0.4543829 sec  
RG 200.18  
ZM 13.467 usec  
TE 300.2 K  
D1 2.0000000 sec  
D11 0.030000000 sec  
TD0 1

\*\*\*\*\* CHANNEL f1 \*\*\*\*\*  
STO1 150.9239571 MHz  
NUC1 13C  
P1 10.50 usec  
PLM1 95.00000000 M

\*\*\*\*\* CHANNEL f2 \*\*\*\*\*  
STO2 600.1724007 MHz  
NUC2 1H  
CFPROG2 waltz16  
PCPD2 70.00 usec  
PLM2 21.00000000 M  
PLM3 0.43140000 M  
PLM13 0.30239999 M

F2 - Processing parameters  
SI 16384  
SF 150.9128397 MHz  
WDW EM  
SSB 0  
LB 1.00 Hz  
GB 0  
PC 1.40

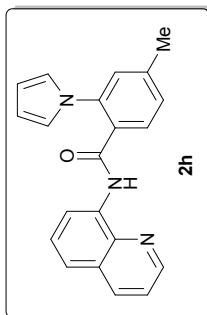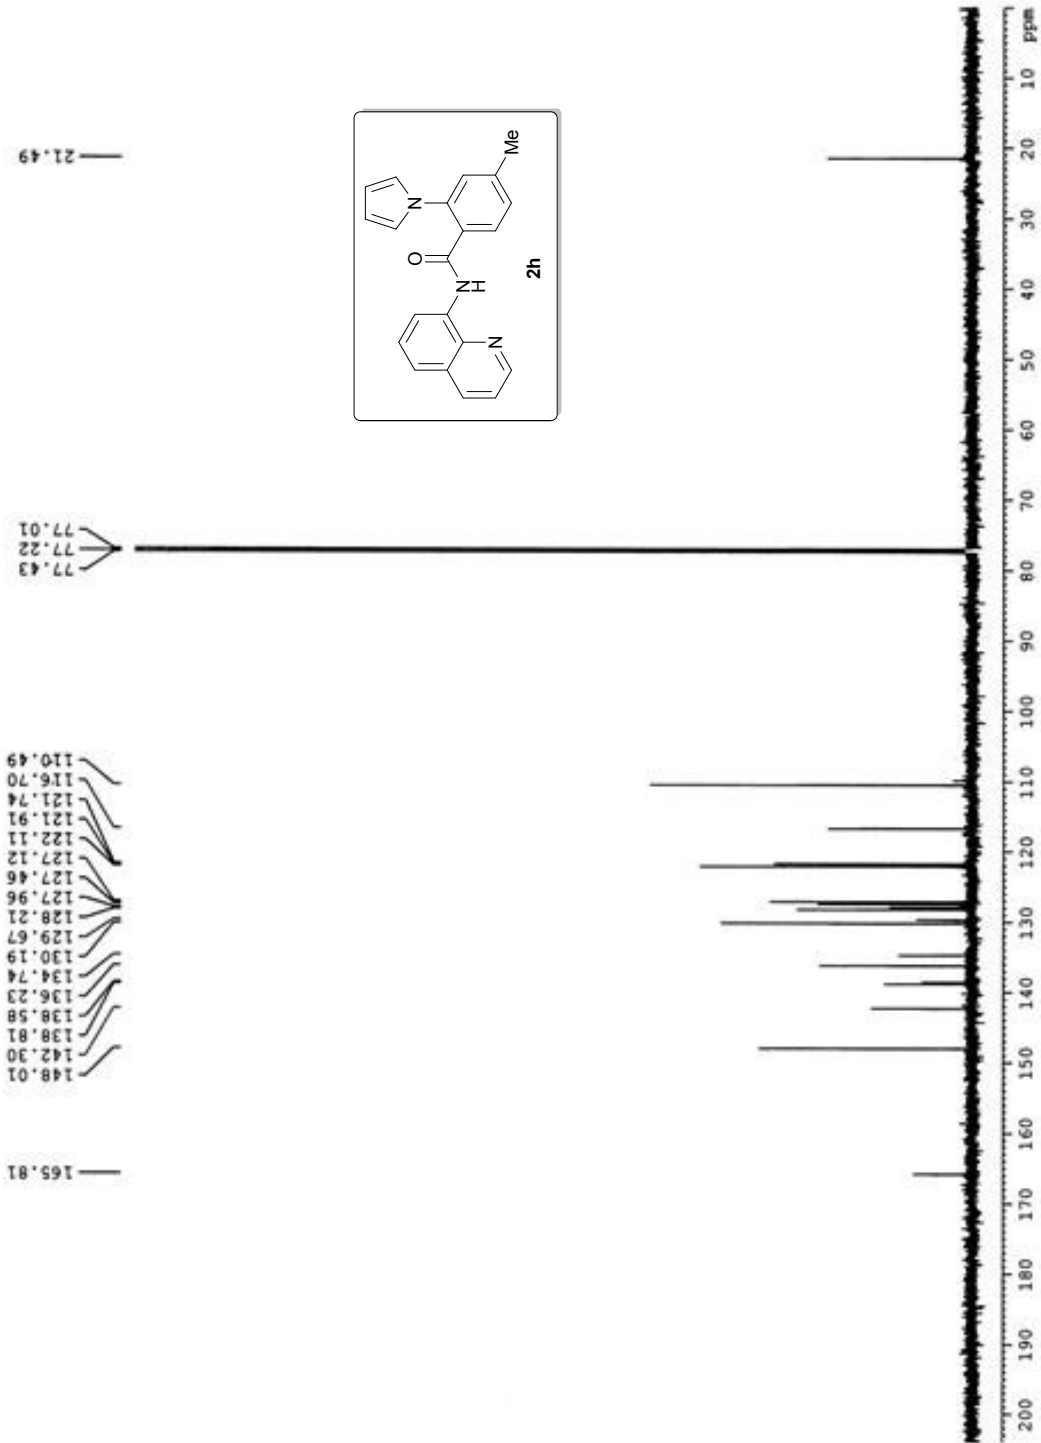

SP-4NO2-1H

```

Current Data Parameters
NAME      SP-4NO2-1H
EXPNO    1
PROCNO   1
F2 - Acquisition Parameters
Date_    20150824
Time     8.37
INSTRUM  spect
PROBHD   5 mm PABBO
PULPROG  zgpg30
TD        32768
SOLVENT  CDCl3
NS        16
DS        2
SWH       12010.312 Hz
FIDRES    0.166789 Hz
AQ         1.3631488 sec
RG         143.33
DM         41.400 µsec
DE         6.50 usec
TE        298.2 K
DQ         1.0000000 sec
TD0       1
***** CHANNEL z1 *****
SFO1     600.1717063 MHz
NUC1     13 C
P1        12.00
PL1       0.0000000 W
FREQ1    21.00000000 MHz
F2 - Processing parameters
SI        32768
SF        600.1700131 MHz
WDW       EM
SSB       0
LB        0.30 Hz
GB        0
PC        1.00
  
```

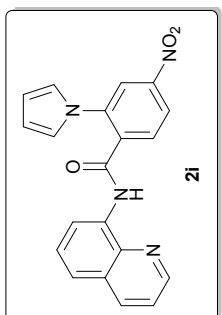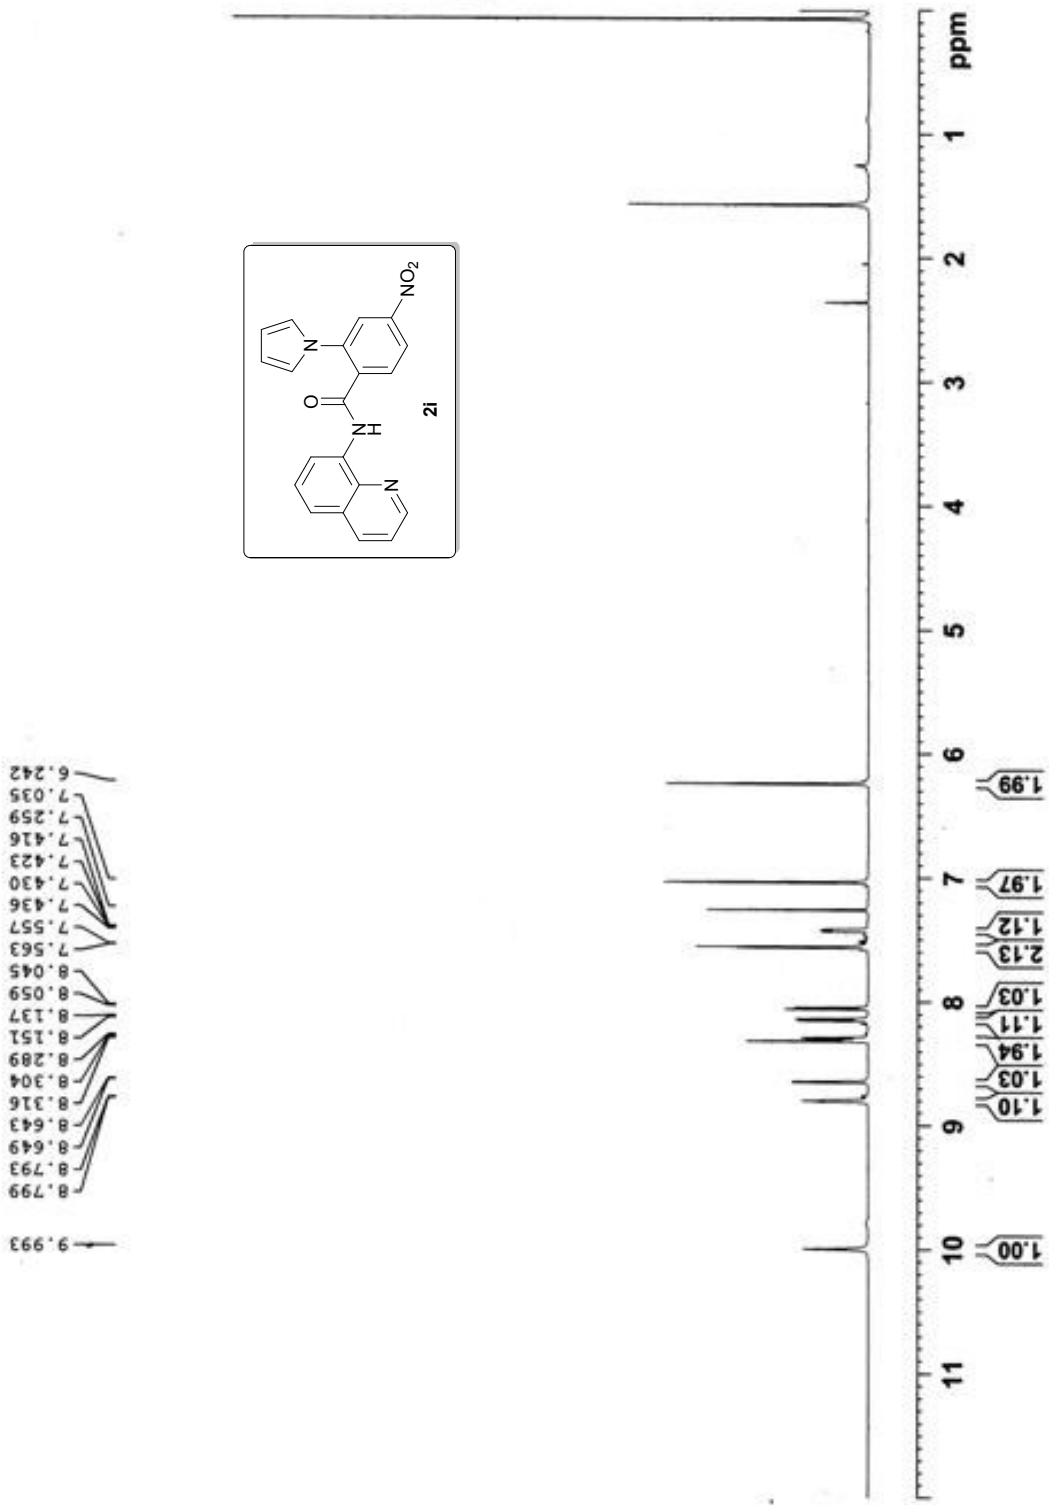

SP-4NO2-13C

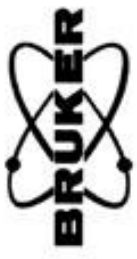

1.22  
0.18

Current Data Parameters  
NAME SP-4NO2-13C  
EXPNO 1  
PROCNO 1

F2 - Acquisition Parameters  
Date\_ 20150826  
Time 8.39  
INSTRUM spect  
PROBHD 5 mm PABBO BB/  
PULPROG #pg10  
TD 32768  
SOLVENT CDCl3  
NS 2000  
DS 2  
SWH 42613.637 Hz  
FIDRES 1.300465 Hz  
AQ 0.3848779 sec  
RG 65.24  
DM 11.733 usec  
DE 6.50 usec  
TE 295.8 K  
D1 2.0000000 sec  
D11 0.0300000 sec  
TD0 1

----- CHANNEL f1 -----  
SFO1 150.9279511 MHz  
NUC1 13C  
P1 10 usec  
PLW1 95.00000000 W

----- CHANNEL f2 -----  
SFO2 600.1724007 MHz  
NUC2 1H  
PCPRG[1] waltz16  
PCPRG[2] waltz16  
NUC3 13C  
PLW2 21.00000000 W  
PLW3 0.61734000 W  
PLW4 0.30239999 W

F2 - Processing parameters  
SI 16384  
SF 150.9128178 MHz  
WDW EM  
SSB 0  
LB 1.00 Hz  
GB 0  
PC 1.40

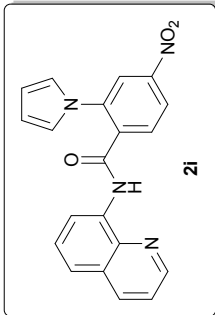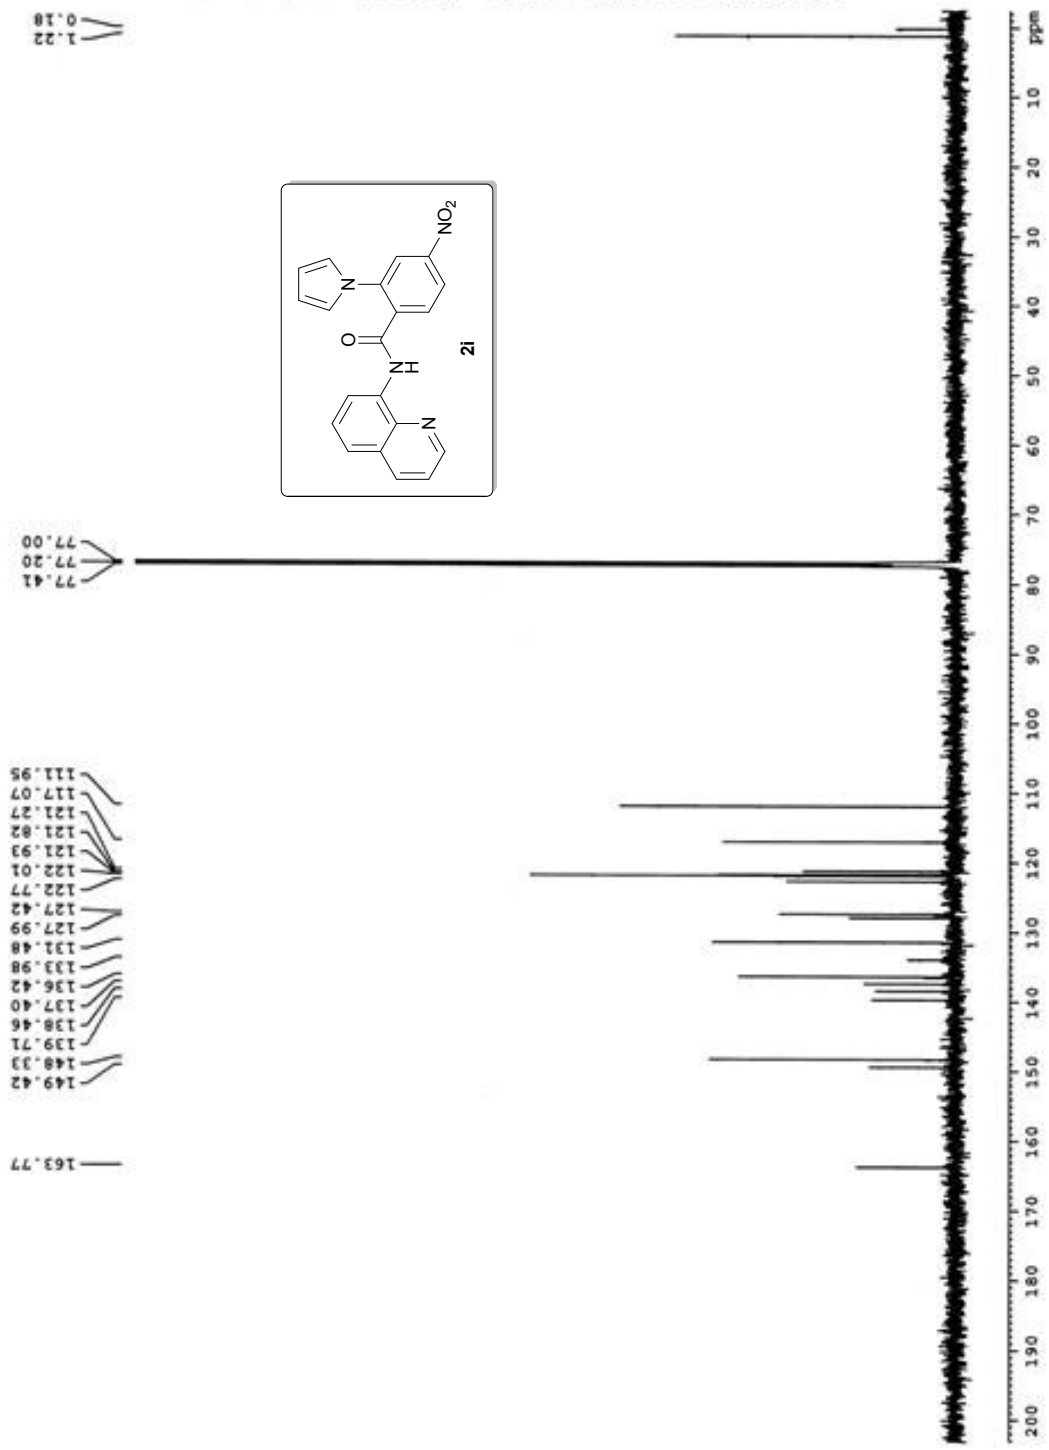

SP-801-A\_1H

10.02  
8.811  
8.804  
8.796  
8.785  
8.755  
8.747  
8.656  
8.652  
8.650  
8.152  
8.150  
8.136  
7.789  
7.781  
7.562  
7.555  
7.439  
7.432  
7.425  
7.418  
7.263  
7.015  
7.012  
7.008  
6.873  
6.270  
6.267

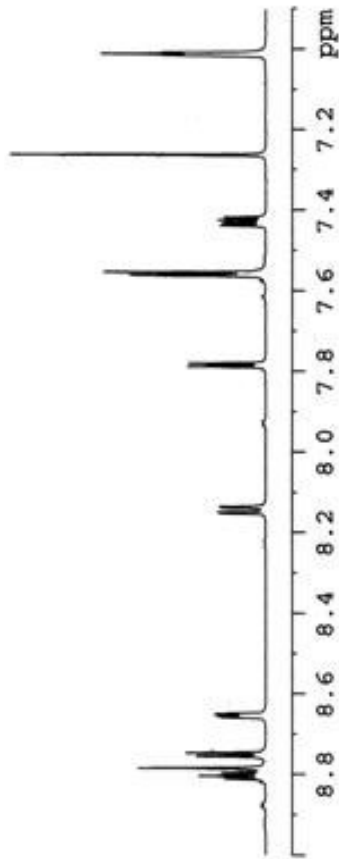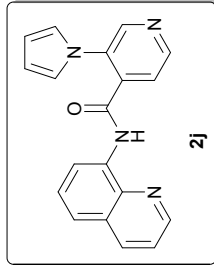

Current Data Parameters  
NAME SP-801-A\_1H  
EXPNO 1  
PROCNO 1  
F2 - Acquisition Parameters  
Date\_ 20151111  
Time 12.14  
INSTRUM spect  
PROBHD 5 mm PABBO BBO  
PULPROG zgpg30  
TD 65536  
SOLVENT CDCl3  
NS 16  
DS 2  
SWH 12019.210 Hz  
FIDRES 0.246798 Hz  
AQ 1.751193 sec  
RG 342.33  
DM 41.650 usec  
DE 8.50 usec  
TE 293.2 K  
D1 1.0000000 sec  
D15  
D16  
\*\*\*\*\* CHANNEL f1 \*\*\*\*\*  
SFO1 600.137043 MHz  
NUC1 13C  
P1 12.00 usec  
PL1 0.0000000 W  
FREQ1 21.0000000 MHz  
F2 - Processing parameters  
SI 32768  
SF 600.137012 MHz  
WDW EM  
SSB 0  
LB 0.30 Hz  
GB 0  
PC 1.00

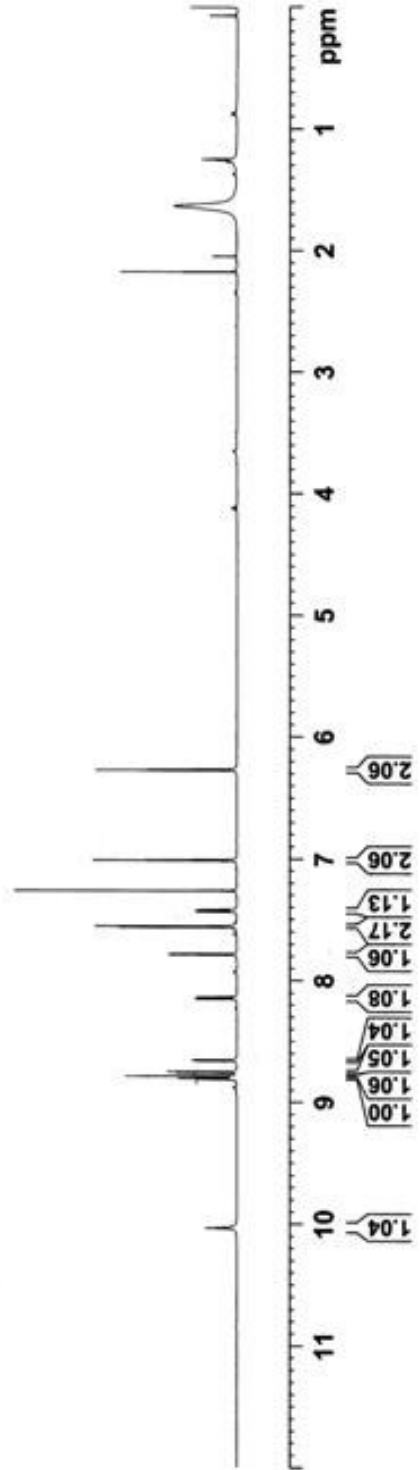

SP-801-A\_13C

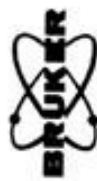

Current Data Parameters  
NAME SP-801-A\_13C  
EXPNO 1  
PROCNO 1

F2 - Acquisition Parameters  
Date\_ 20150911  
Time 12.38  
INSTRUM spect  
PROBHD 5 mm PABBO BB/  
PULPROG zgpg30  
TD 32768  
SOLVENT CDCl3  
NS 2000  
DS 2  
SMR 36057.691 Hz  
FIDRES 1.100193 Hz  
AQ 0.4543829 sec  
RG 65.24  
DM 13.867 usec  
DE 6.50 usec  
TE 294.2 K  
D1 2.0000000 sec  
D11 0.03000000 sec  
TD0 1

\*\*\*\*\* CHANNEL f1 \*\*\*\*\*  
SFO1 150.9279571 MHz  
NUC1 13C  
P1 10.50 usec  
PLM1 95.00000000 M

\*\*\*\*\* CHANNEL f2 \*\*\*\*\*  
SFO2 600.1724007 MHz  
NUC2 1H  
PCPRG[2] waltz16  
PCPD2 70.00 usec  
PLM2 21.00000000 M  
PLM12 0.6174000 M  
PLM13 0.3023999 M

F2 - Processing parameters  
SI 16384  
SF 150.9128346 MHz  
WDW EM  
SSB 0  
LB 1.00 Hz  
GB 0  
PC 1.40

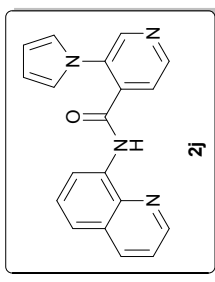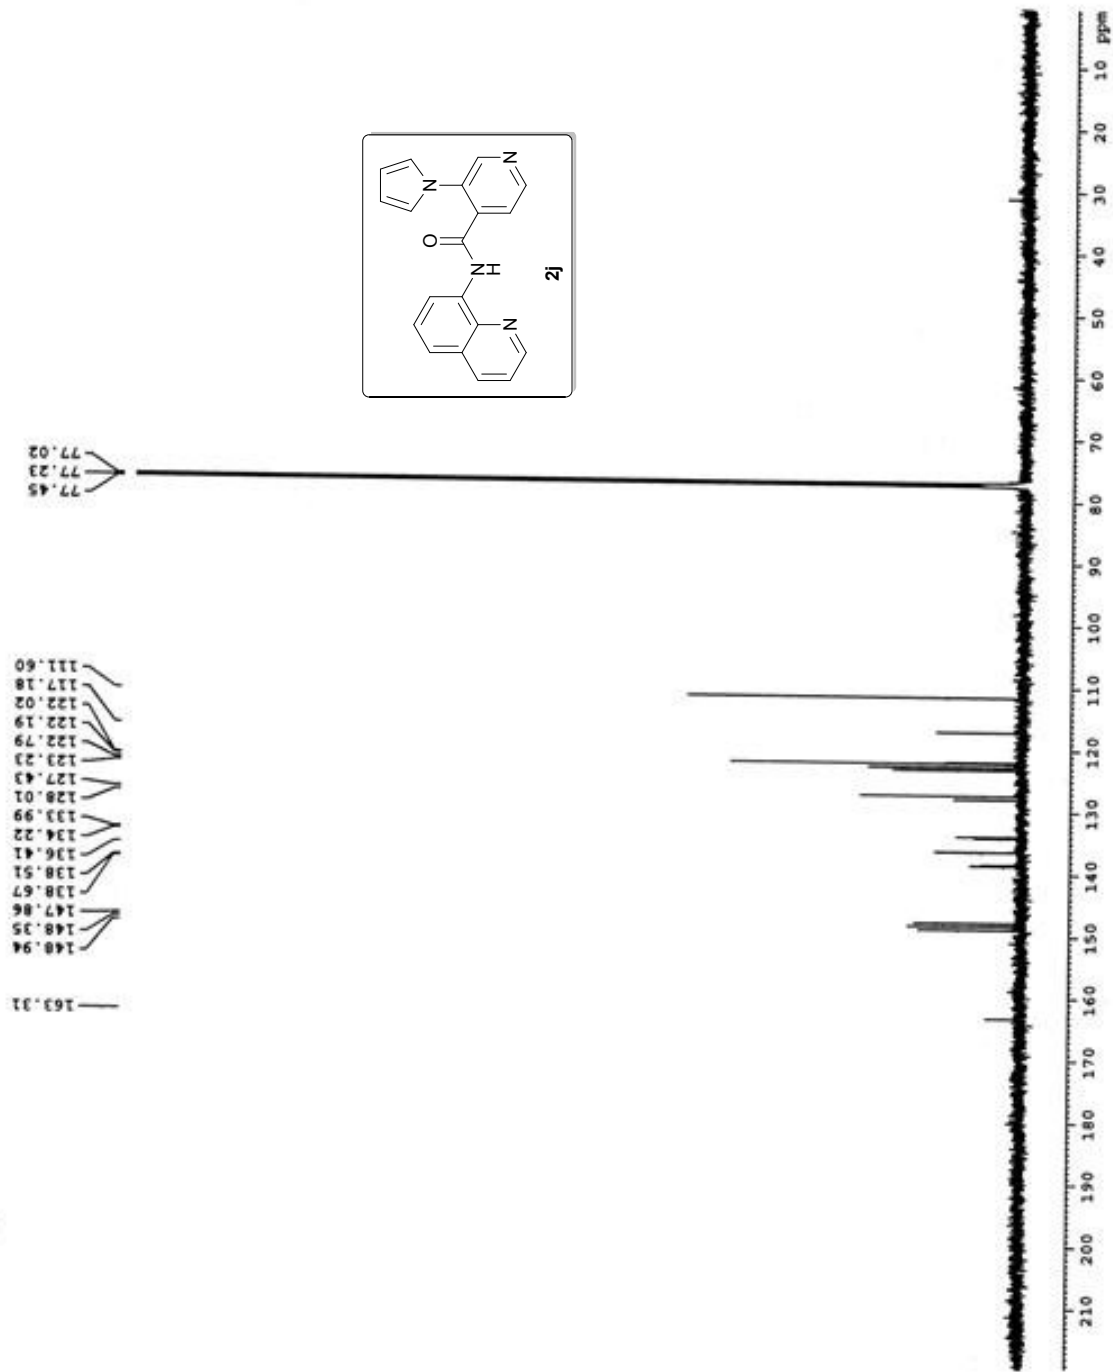

SP-706-1H

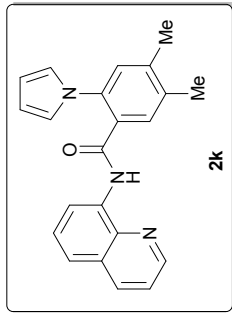

9.866  
8.831  
8.818  
8.634  
8.629  
8.107  
8.093  
7.678  
7.541  
7.528  
7.515  
7.490  
7.476  
7.393  
7.386  
7.373  
7.380  
7.261  
7.201  
6.954  
6.163

2.367  
2.360

Current Data Parameters  
NAME SP-706-1H  
PROCNO 1  
F2 - Acquisition Parameters  
Date\_ 20150607  
Time 12.34  
INSTRUM spect  
PROBHD 5 mm PABBO 8H7  
PULPROG zg30  
TD 32768  
SOLVENT CDCl3  
DS 2  
SWH 12019.270 Hz  
FIDRES 0.344799 Hz  
AQ 1.3531488 sec  
RG 127.37 usec  
DM 41.650 usec  
DE 287.0 K  
TE 1.00000000 sec  
T00 1  
===== CHANNEL f1 =====  
NUC1 600.137043 MHz  
P1 12.00 usec  
PL1 21.00000000 W  
F2 - Processing parameters  
SI 16384  
SF 600.1700140 MHz  
WDW EM  
SSB 0  
GB 0  
PC 1.00

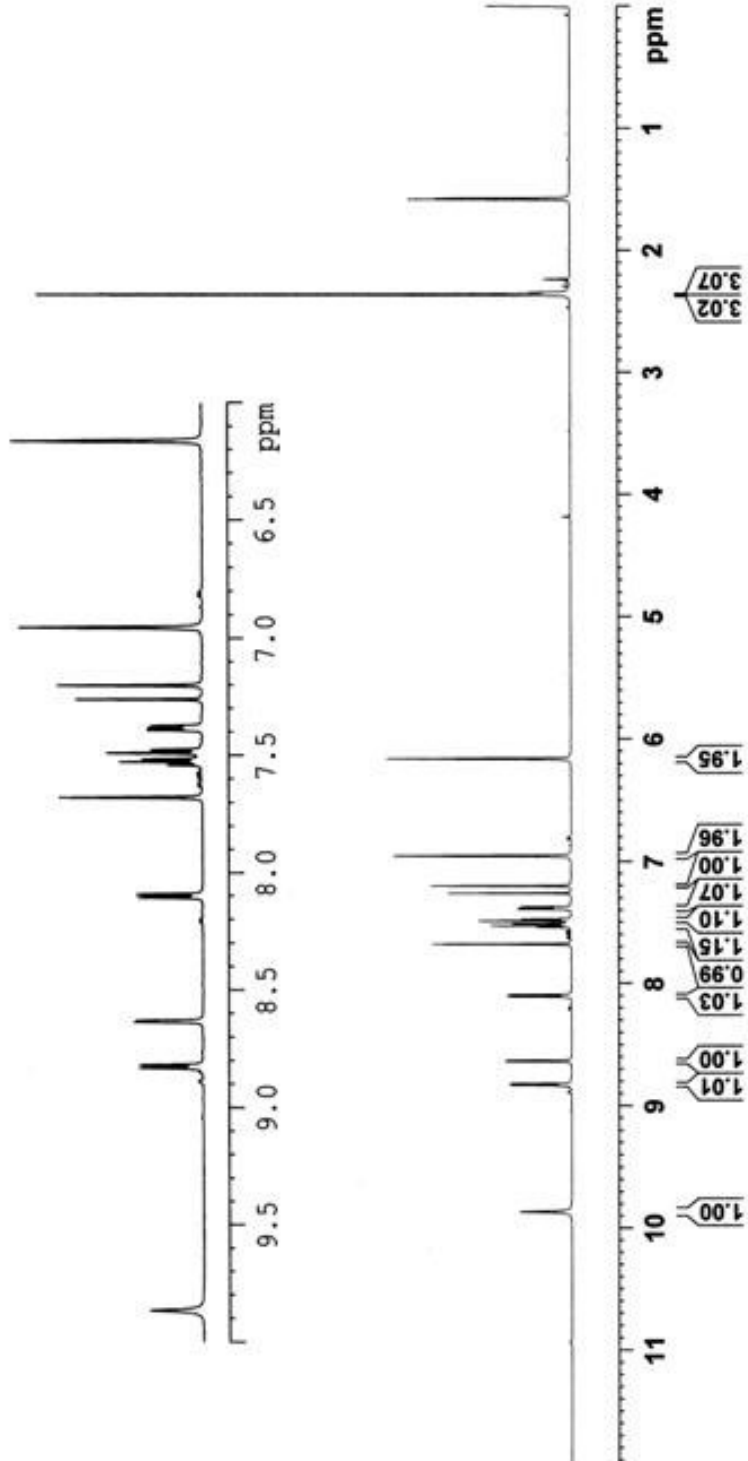

sP-706-13C

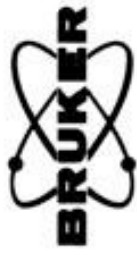

Current Data Parameters  
NAME SP-706-13C  
EXPNO 1  
PROCNO 1

F2 - Acquisition Parameters

Date\_ 20150407  
Time 11.33  
INSTRUM spect  
PROBHD 5 mm PABBO BB/  
PULPROG zgpg30  
TD 32768  
SOLVENT CDCl3  
NS 499  
DS 2  
SWH 36057.691 MHz  
FIDRES 1.100393 Hz  
AQ 0.4543829 sec  
RG 65.24  
DM 13.867 usec  
DE 6.50 usec  
TE 297.3 K  
D1 2.0000000 sec  
D11 0.0300000 sec  
TD0 1

===== CHANNEL f1 =====  
SFO1 150.9279571 MHz  
NUC1 13C  
P1 10.50 usec  
PL1 95.0000000 M

===== CHANNEL f2 =====  
SFO2 600.1724007 MHz  
NUC2 1H  
CFPRG12 waltz16  
PCPD2 70.00 usec  
PLM2 21.0000000 M  
PLM12 0.61714000 M  
PLM13 0.30239999 M

F2 - Processing parameters  
SI 16384  
SF 150.9128345 MHz  
WDW EM  
SSB 0  
LB 1.00 Hz  
GB 0  
PC 1.40

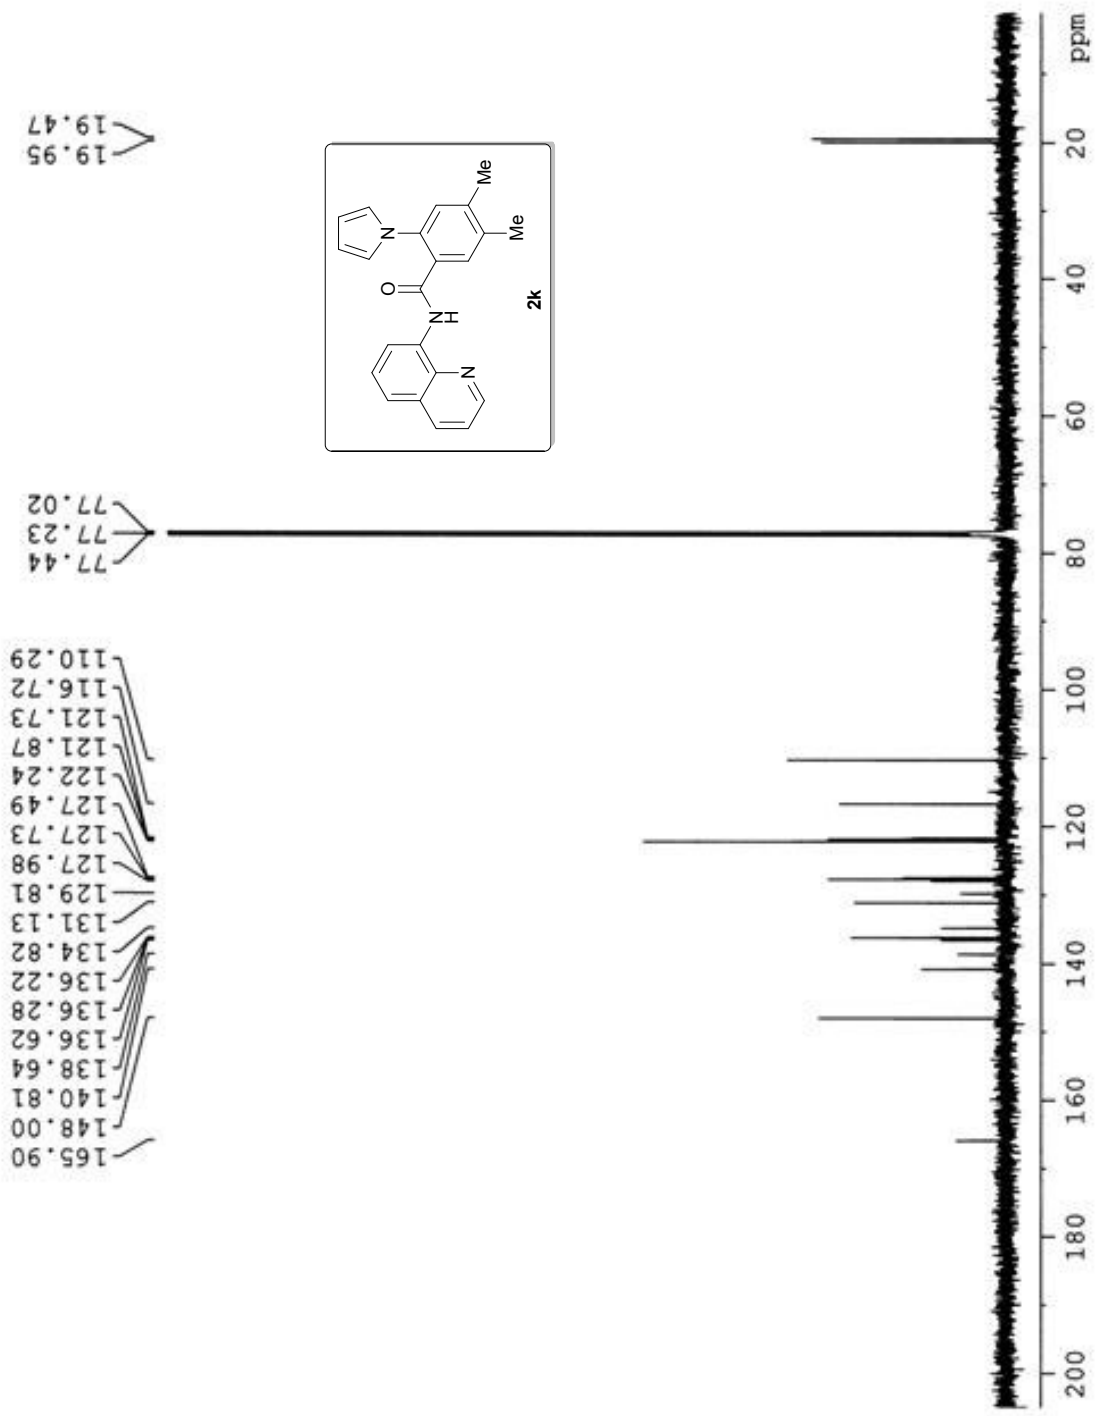



SP-681-IN-1H

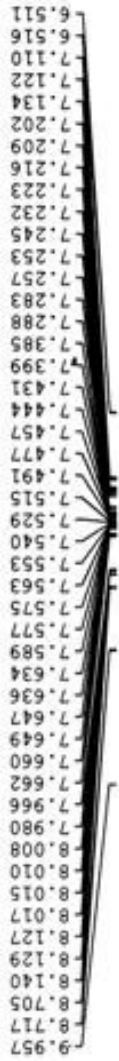

Current Data Parameters  
 NAME SP-681-IN-1H  
 PROCNO 1

F2 - Acquisition Parameters  
 Date\_ 20100520  
 Time\_ 14.48  
 INSTRUM spect  
 PROBHD 5 mm F4000 B1/7  
 PULPROG zgpg30  
 TD 32768  
 SOLVENT C6CL6  
 NS 2  
 DS 2  
 SWH 12019.230 Hz  
 FIDRES 0.346798 Hz  
 AQ 1.363148 sec  
 RG 327.68  
 DM 41.600 usec  
 DE 4.50 usec  
 TE 287.3 K  
 D0 1.00000000 sec  
 TDO 1

===== CHANNEL F1 =====  
 SFOL 600.137663 MHz  
 NUC1 1H  
 P1 12.00 usec  
 PLW1 21.00000000 W

F2 - Processing parameters  
 SI 16384  
 SF 400.1750187 MHz  
 MDW 0  
 L1B 0 0.30 Hz  
 GB 0  
 PC 1.00

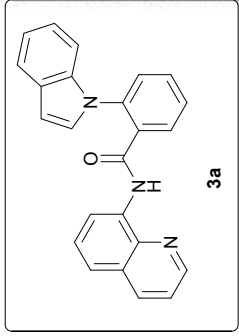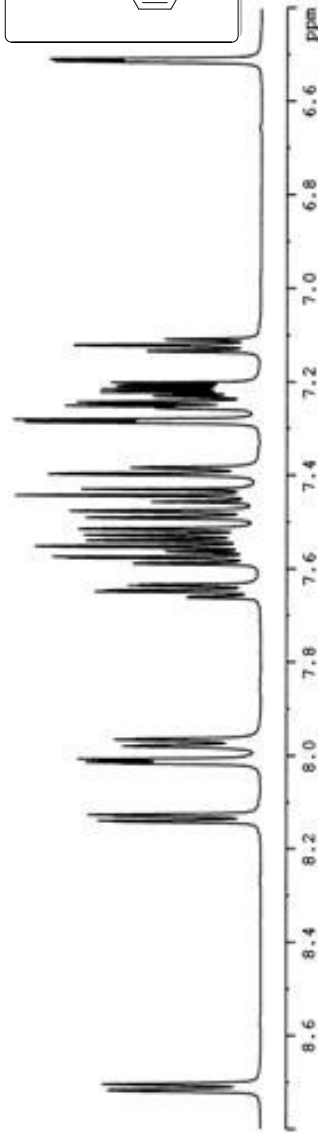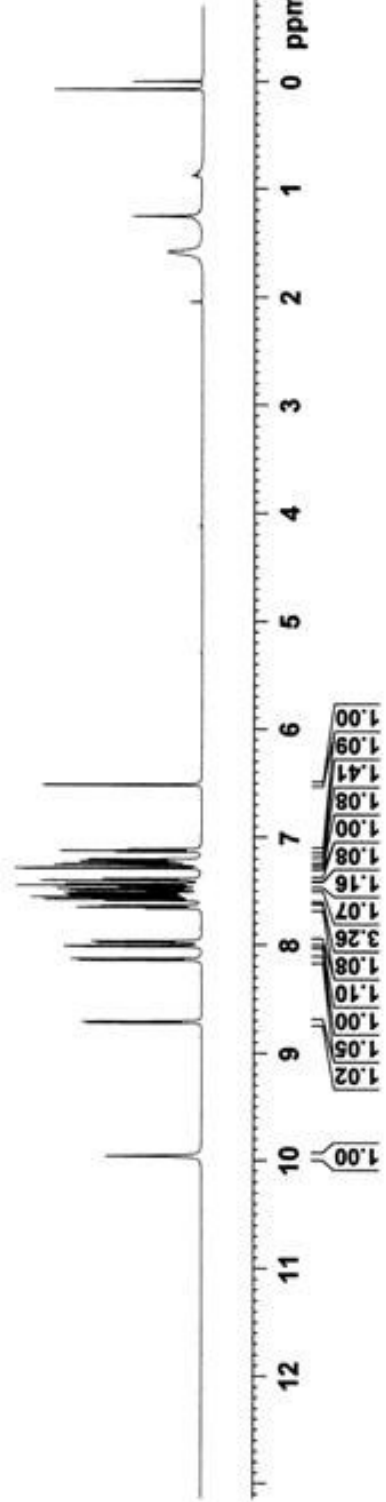

SP-681-In\_13C

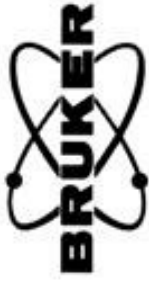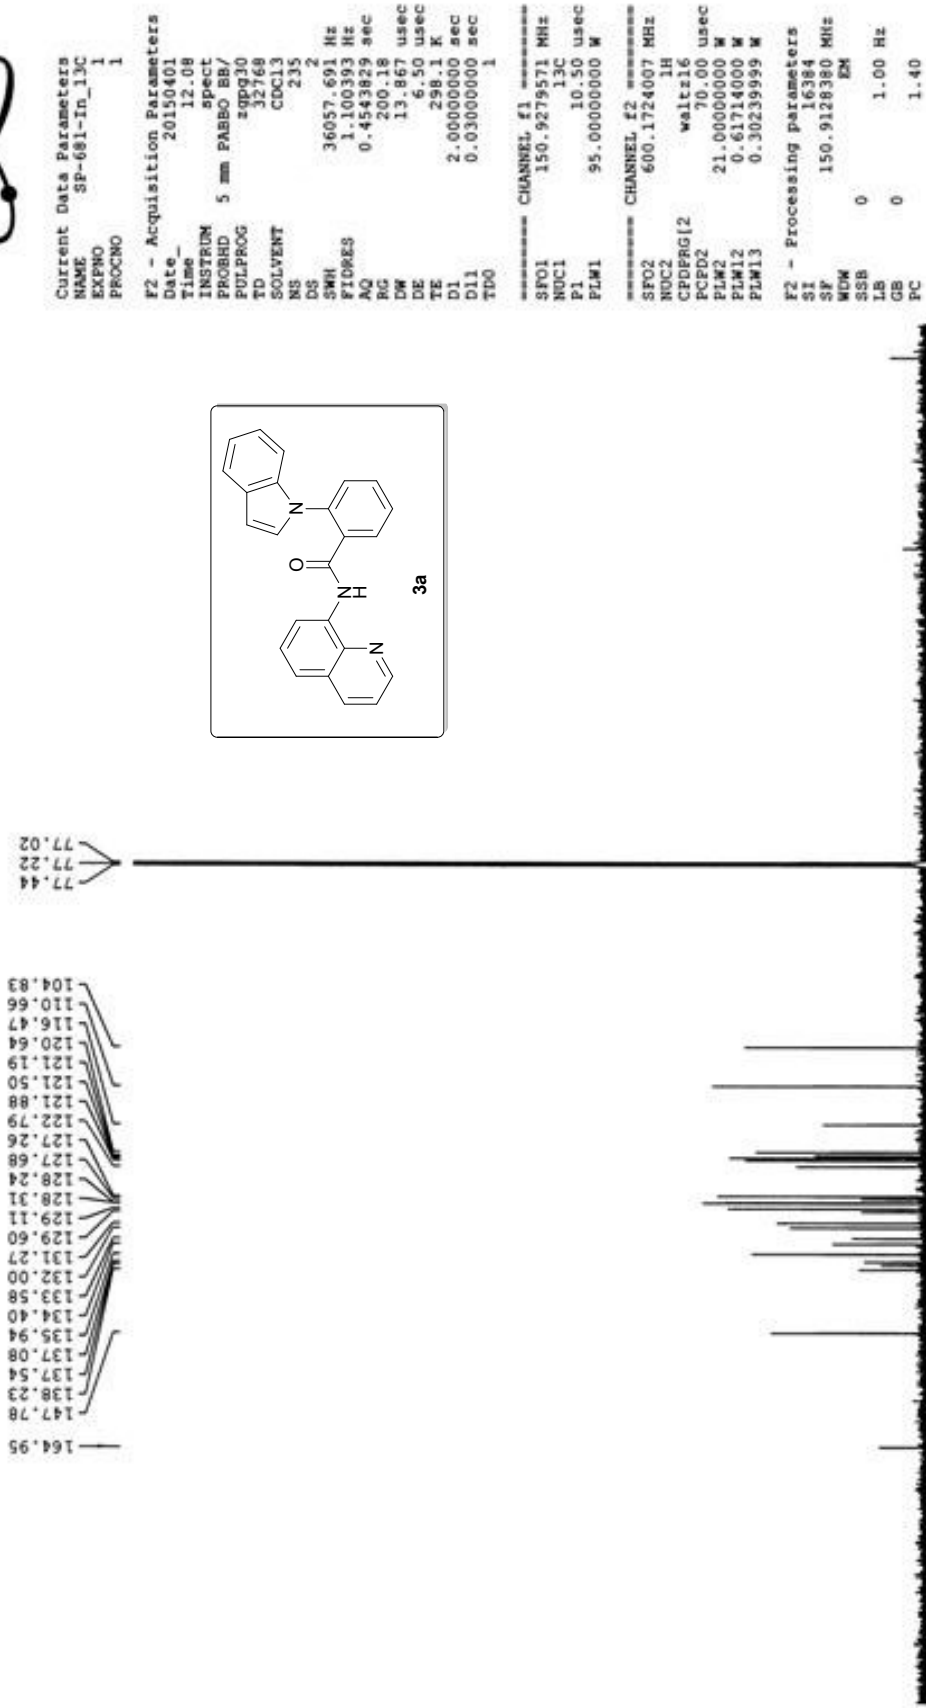

SP-IN-2Me-1H

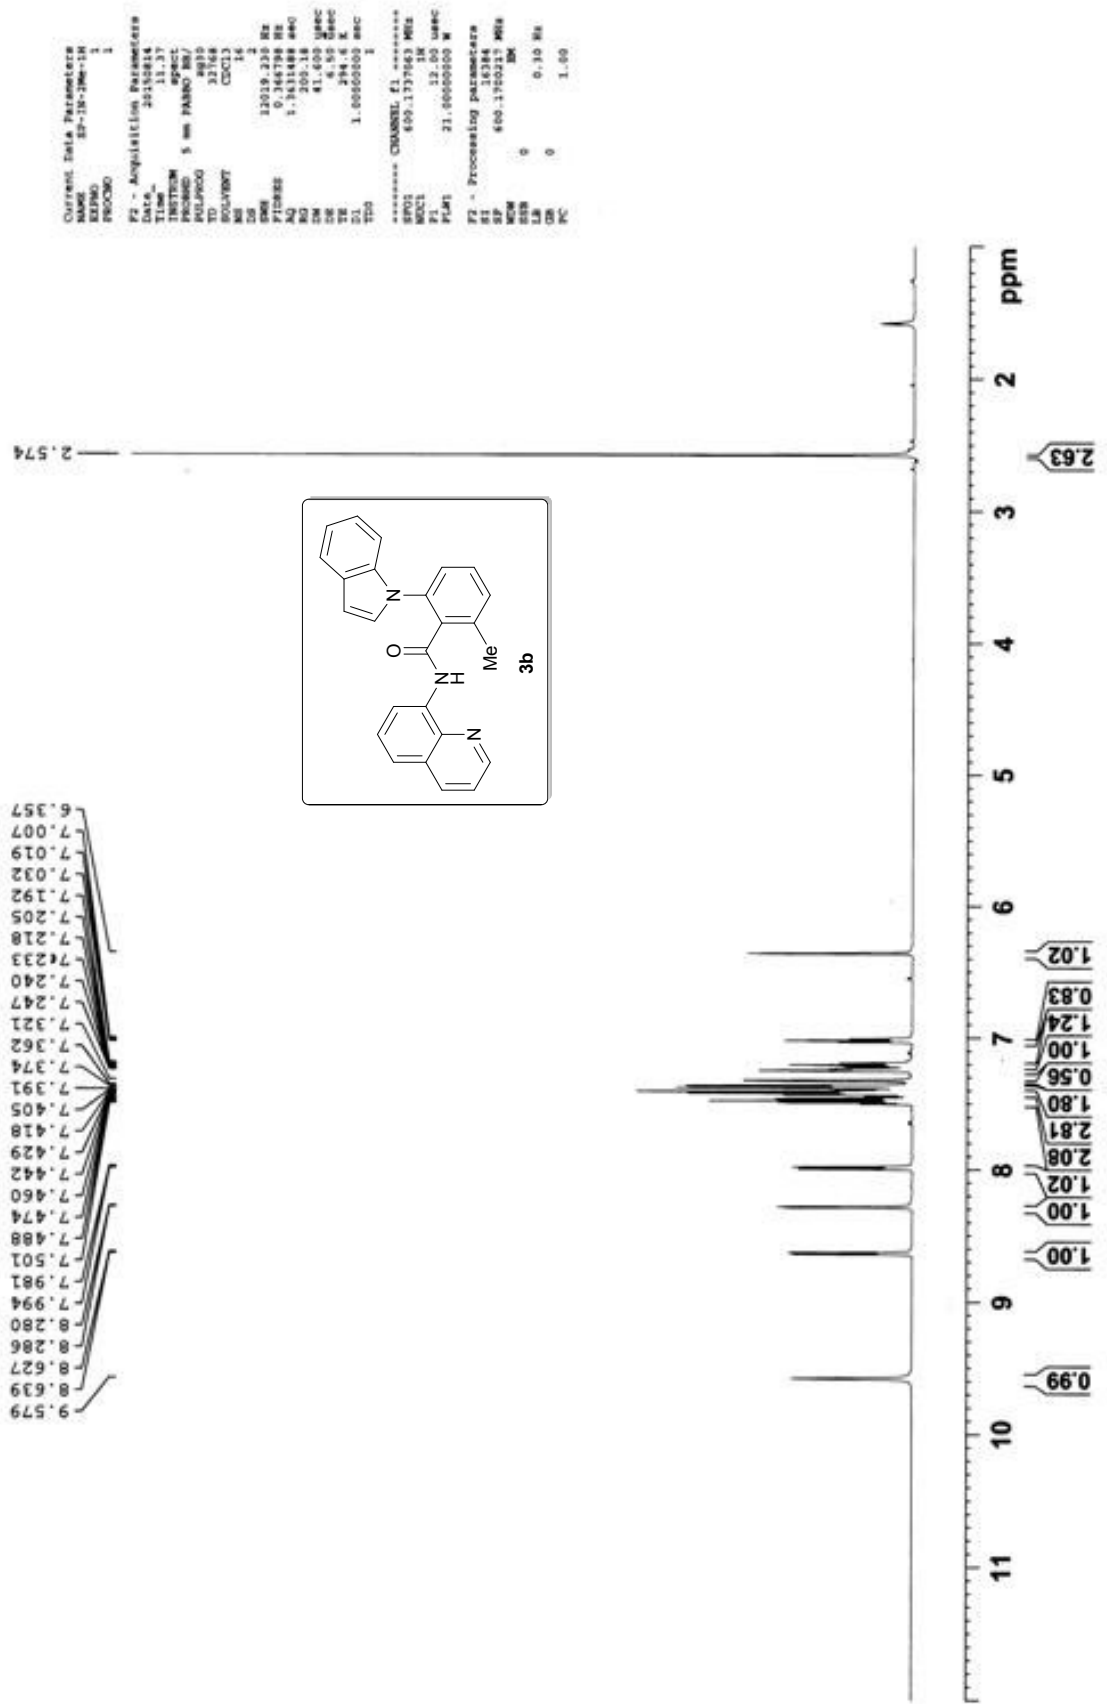

SP-IN-2Me-13C

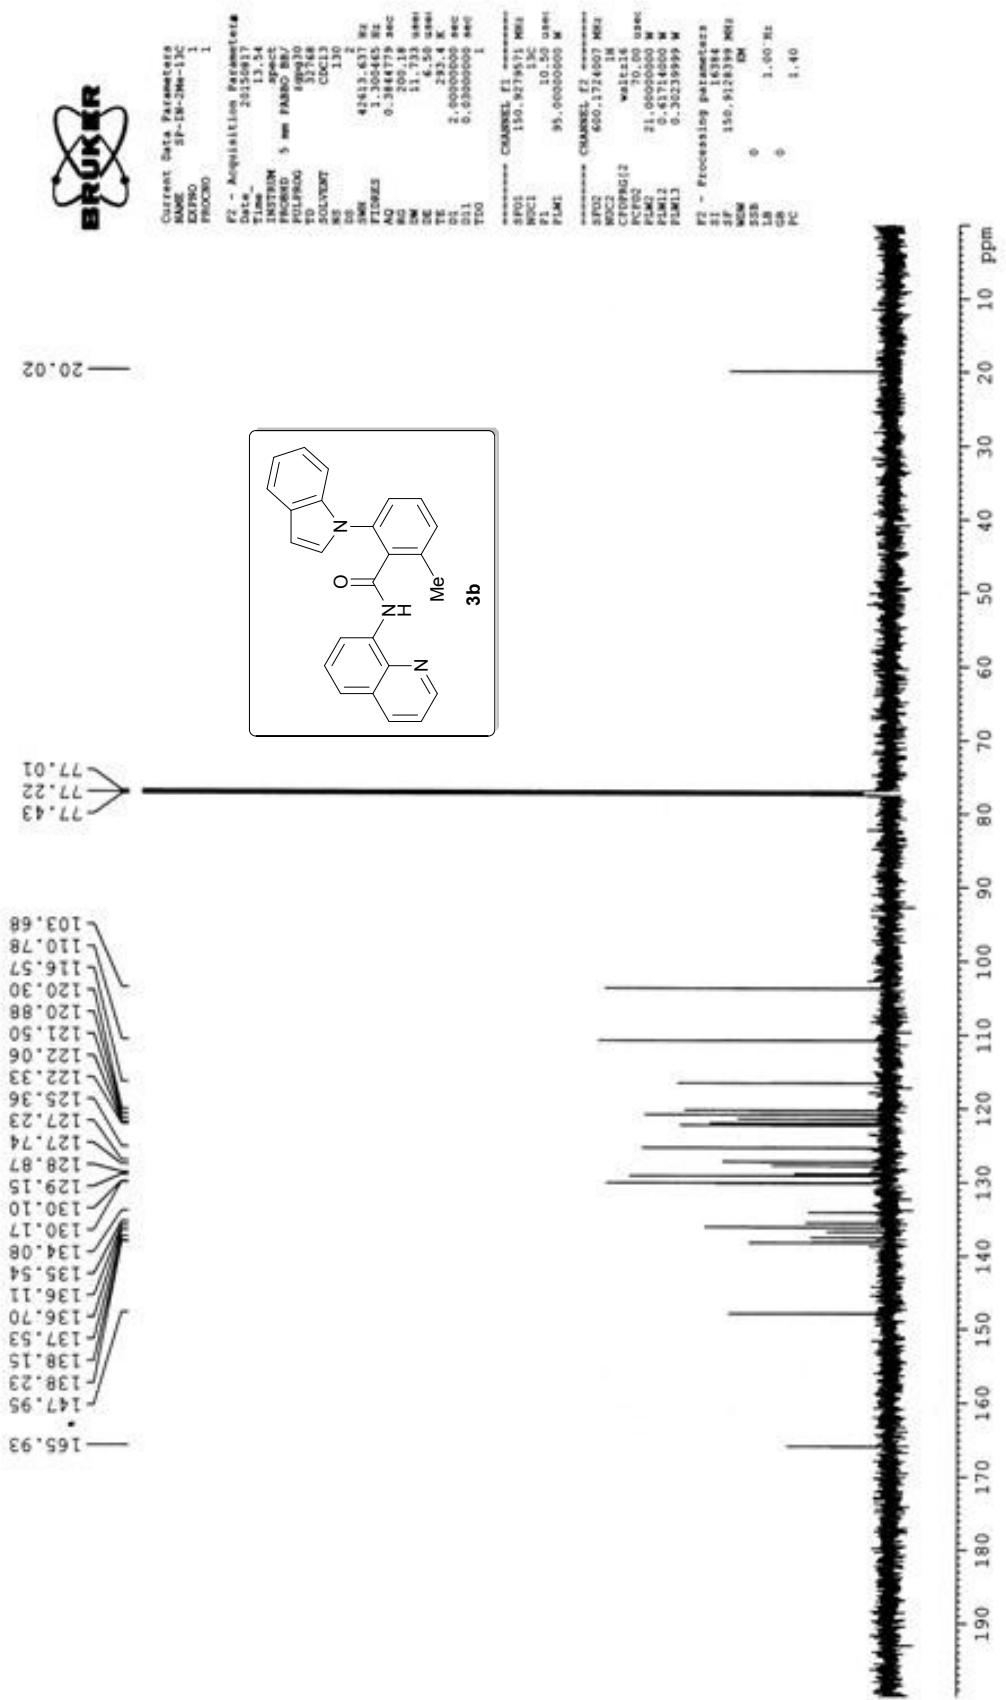

SP-IN-3ME-1-1H

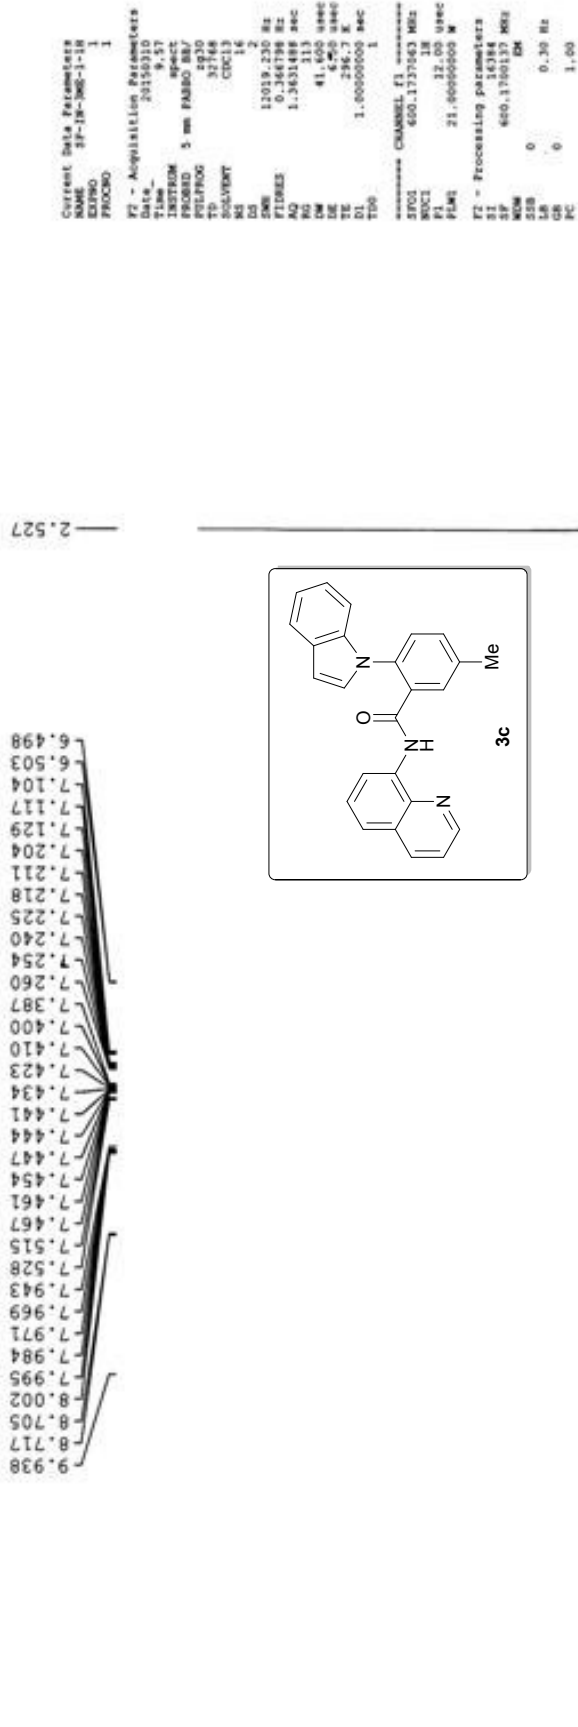

SP-I-3Me-13C

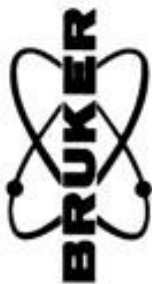

Current Data Parameters  
NAME SP-I-3Me-13C  
EXPNO 1  
PROCNO 1

F2 - Acquisition Parameters

Date\_ 20150320  
Time\_ 10.39  
INSTRUM spect  
PROBHD 5 mm PABBO BB/  
PULPROG zgpg30  
TD 32768  
SOLVENT CDC13  
NS 529  
DS 2  
SWH 36057.691 Hz  
FIDRES 1.100393 Hz  
AQ 0.4543829 sec  
RG 65.24  
DM 13.867 usec  
DE 6.50 usec  
TE 298.0 K  
D1 2.0000000 sec  
D11 0.0300000 sec  
TD0 1

===== CHANNEL f1 =====  
SFO1 150.9279571 MHz  
NUC1 13C  
P1 10.50 usec  
PLW1 95.00000000 W

===== CHANNEL f2 =====  
SFO2 600.1724007 MHz  
NUC2 1H  
CPDPRG[2] waltz16  
PCPD2 70.00 usec  
PLW2 21.00000000 W  
PLW12 0.61714000 W  
PLW13 0.30239999 W

F2 - Processing parameters  
SI 16384  
SF 150.9128360 MHz  
WDW EM  
SSB 0  
LB 1.00 Hz  
GB 0  
PC 1.40

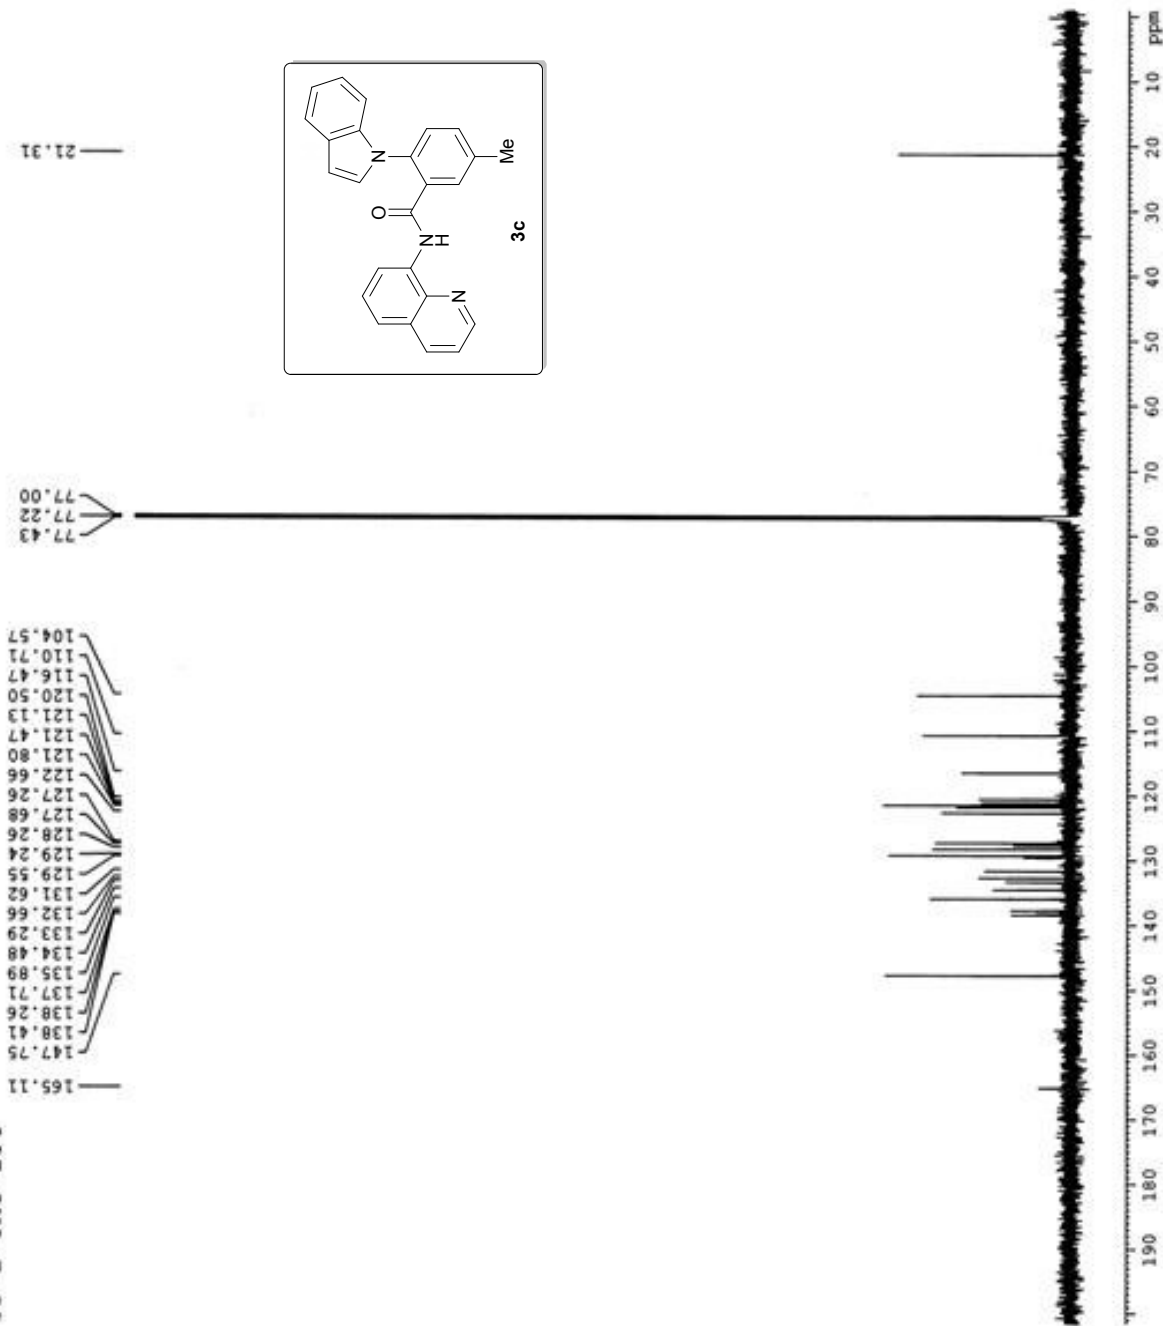

SP-682-1-1H

9.982  
8.723  
8.710  
8.068  
8.055  
7.983  
7.975  
7.960  
7.545  
7.531  
7.483  
7.469  
7.453  
7.439  
7.426  
7.389  
7.376  
7.328  
7.274  
7.270  
7.255  
7.242  
7.229  
7.216  
7.209  
7.202  
7.195  
7.137  
7.125  
7.112  
6.527  
6.523

2.480

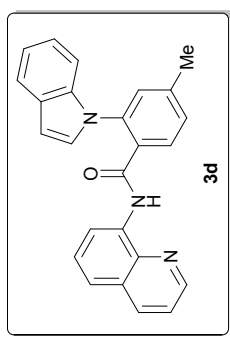

Current Data Parameters  
NAME SP-682-1-1H  
EXPRO 1  
PROCNO 1  
F1 - Acquisition Parameters  
Date\_ 20150803  
Time\_ 11.31  
INSTRUM spect  
PROBHD 5 mm PABBO BBI  
PULPROG zgpg30  
TD 32768  
SOLVENT CDCl3  
NS 16  
DS 2  
SWH 12019.250 Hz  
FIDRES 0.366798 Hz  
AQ 1.3431488 sec  
RG 327.680  
DE 6.500 usec  
TE 293.2 K  
D1 1.00000000 sec  
TDO 1  
\*\*\*\*\* CHANNEL F1 \*\*\*\*\*  
SFO1 600.137043 MHz  
NUC1 1H  
P1 12.00 usec  
PL1 21.00000000 M  
F2 - Processing parameters  
SF 600.137043 MHz  
WDW EM  
SSB 0  
LB 0  
GB 0  
PC 1.00

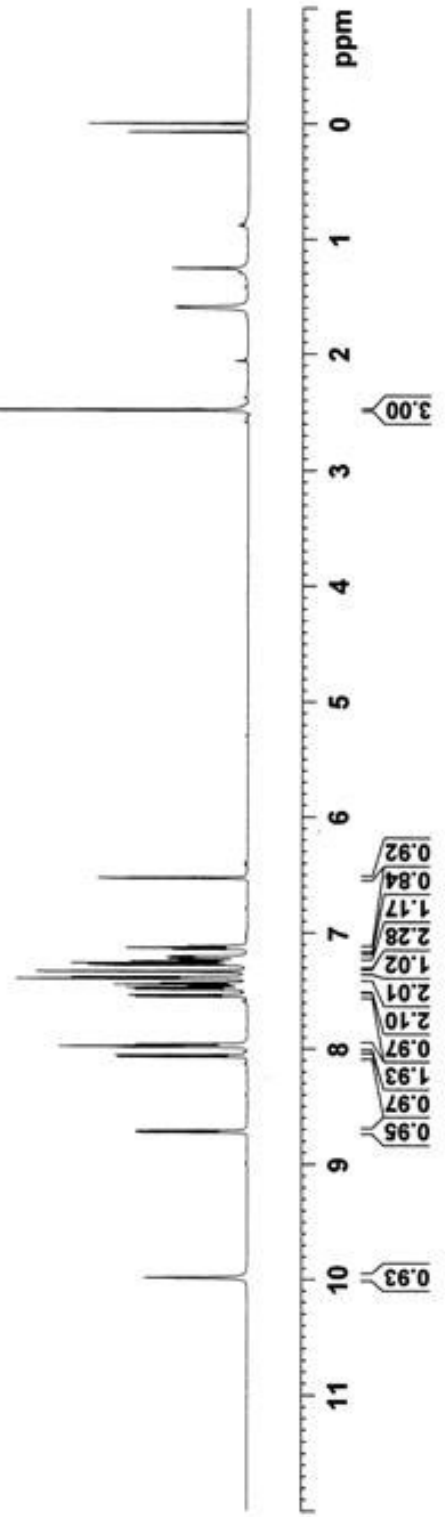

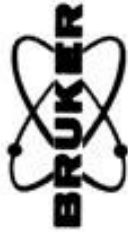

SP-682-1-13C

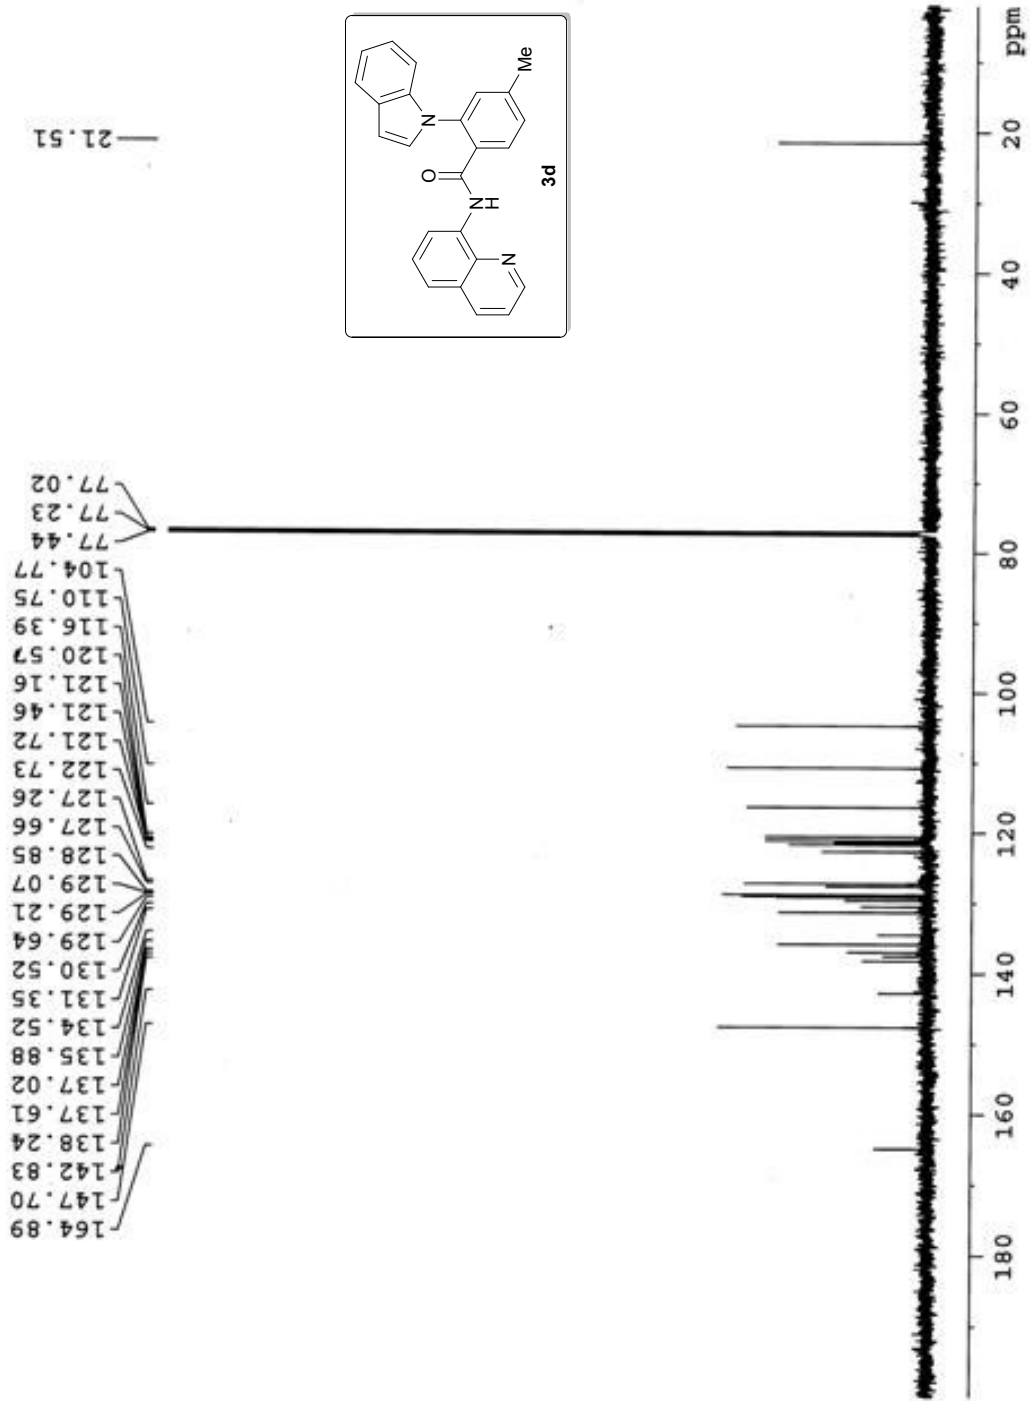

Current Data Parameters  
NAME SP-682-1-13C  
EXPNO 1  
PROCNO 1

F2 - Acquisition Parameters  
Date\_ 20150902  
Time 9.47  
INSTRUM spect  
PROBHD 5 mm PABBO BH/  
PULPROG zgpg30  
TD 32768  
SOLVENT CDCl3  
NS 242  
DS 4  
SWH 43613.637 Hz  
FIDRES 1.300665 Hz  
AQ 0.3864779 sec  
RG 65.24  
DM 11.733 usec  
DE 6.50 usec  
TE 293.9 K  
D1 2.0000000 sec  
D11 0.0300000 sec  
TD0 1

\*\*\*\*\* CHANNEL f1 \*\*\*\*\*  
SF01 150.9279571 MHz  
NUC1 13C  
P1 10.50 usec  
PLW1 95.0000000 W

\*\*\*\*\* CHANNEL f2 \*\*\*\*\*  
SF02 600.1724007 MHz  
NUC2 1H  
PCPD2 waitz16  
PCPD2 70.00 usec  
PLW2 21.0000000 W  
PLW3 0.61714000 W  
PLW3 0.30239399 W

F2 - Processing parameters  
SI 16384  
SF 150.9128390 MHz  
WDW EM  
SSB 0  
LB 1.00 Hz  
GB 0  
PC 1.40





SpinWorks 4: SP-840-13C

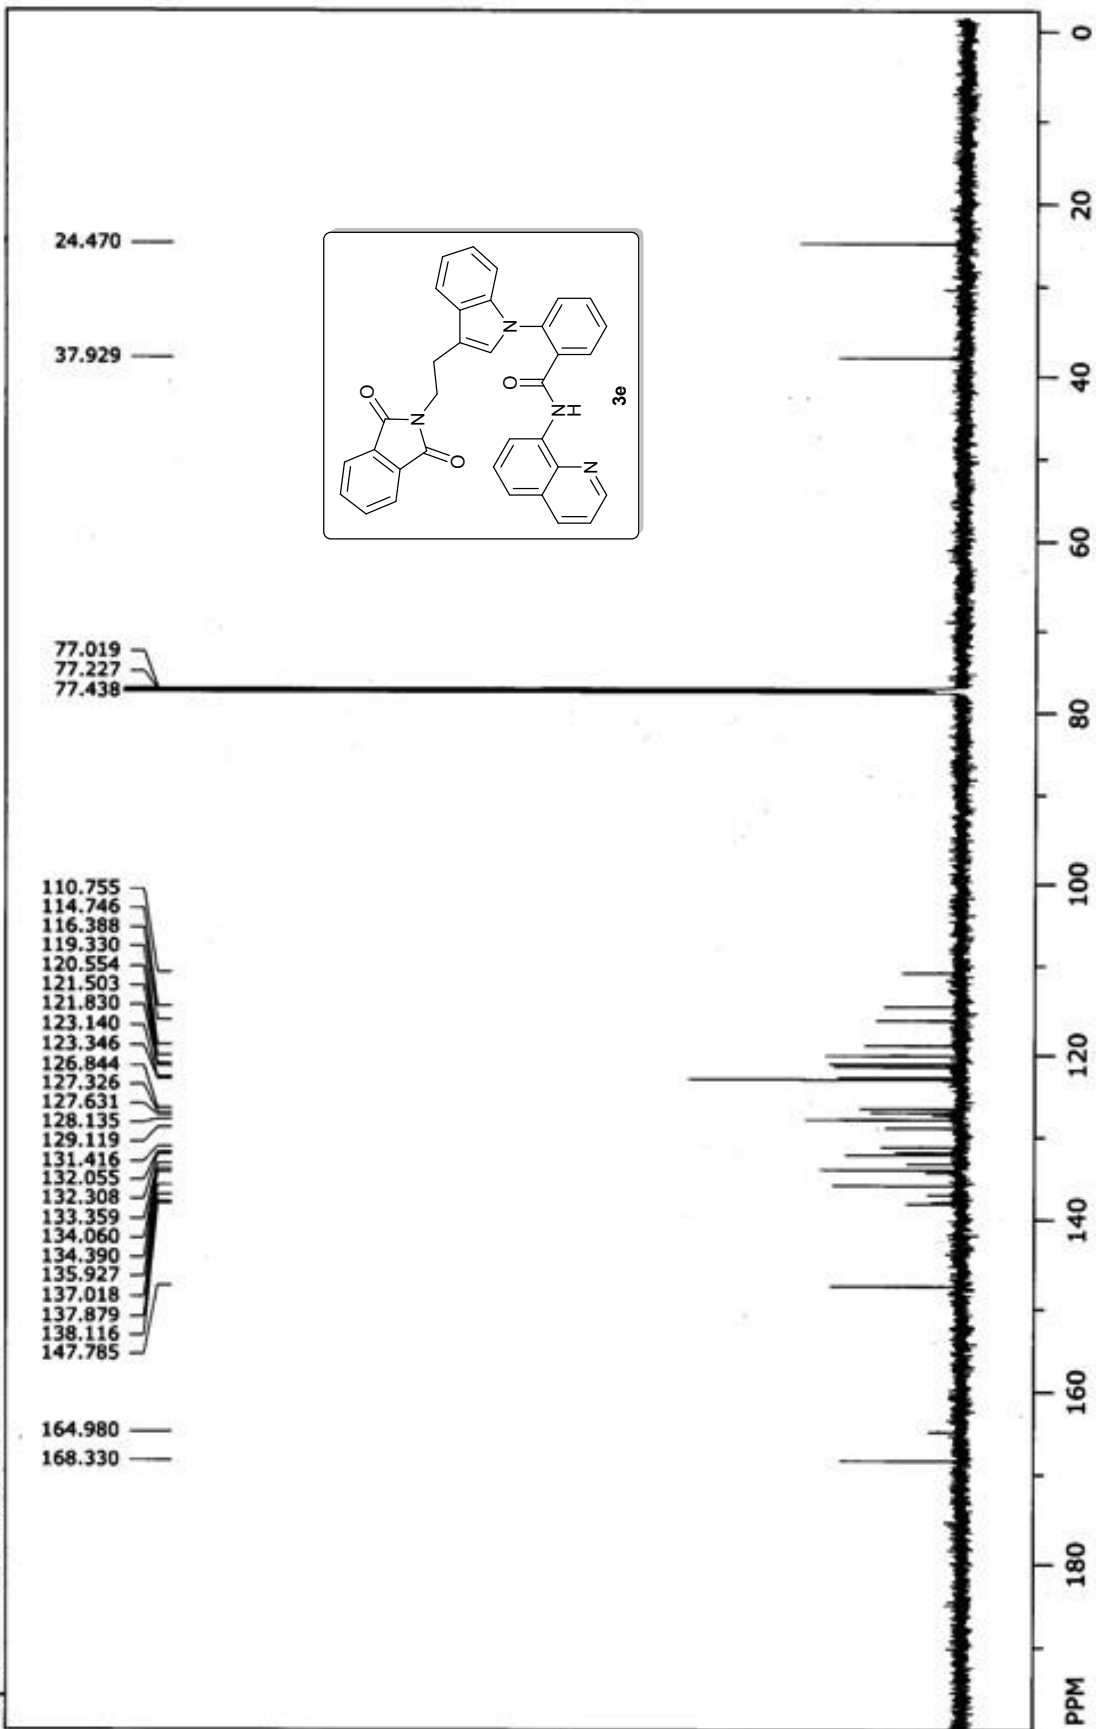

freq. of 0 ppm: 150.912838 MHz  
 processed size: 16384 complex points  
 LB: 1.000 GF: 0.0000  
 Hz/cm: 1220.326 ppm/cm: 8.08548

file: H:\SP-840-13C\1\fid exp: <zppg30>  
 transmitter freq.: 150.927957 MHz  
 time domain size: 32768 points  
 width: 42613.64 Hz = 282.3442 ppm = 1.300465 Hz/pt  
 number of scans: 302

SP-834-4Br-1H

9.828  
8.630  
8.612  
8.080  
8.061  
8.003  
7.992  
7.937  
7.916  
7.601  
7.582  
7.564  
7.544  
7.526  
7.507  
7.430  
7.411  
7.394  
7.374  
7.355  
7.347  
7.329  
7.317  
7.296  
7.259  
7.251  
7.216  
7.207  
7.196  
7.186  
7.173  
7.017  
6.997  
6.977  
6.496  
6.488

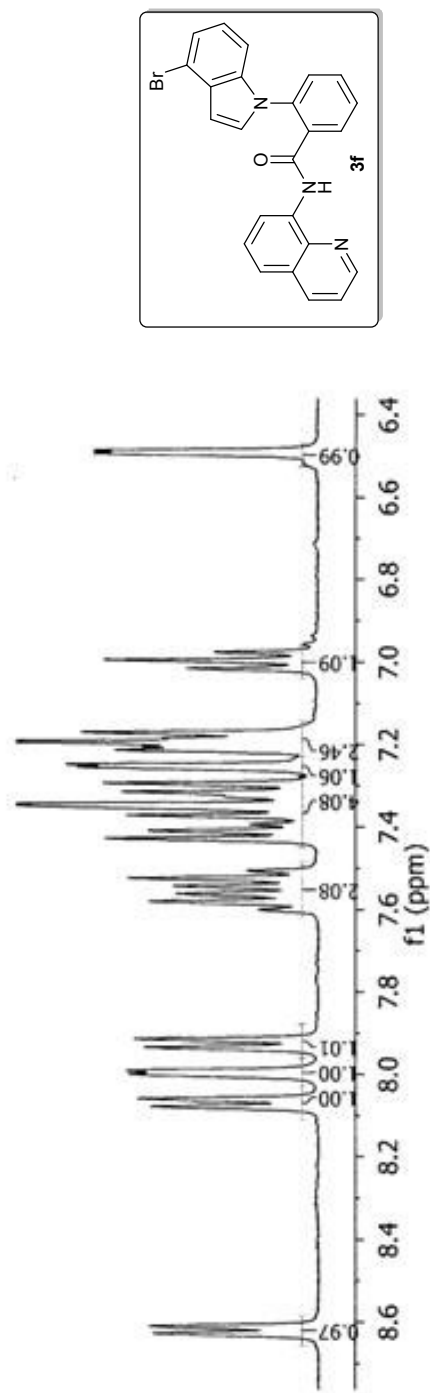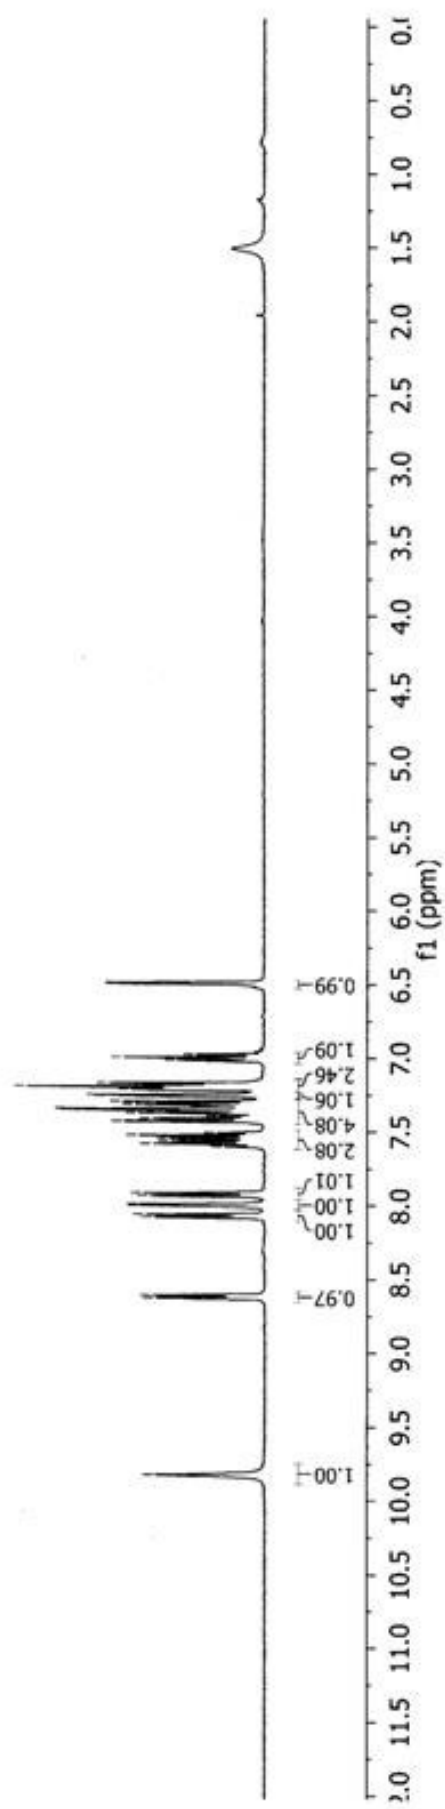

SP-834-4Br-13C

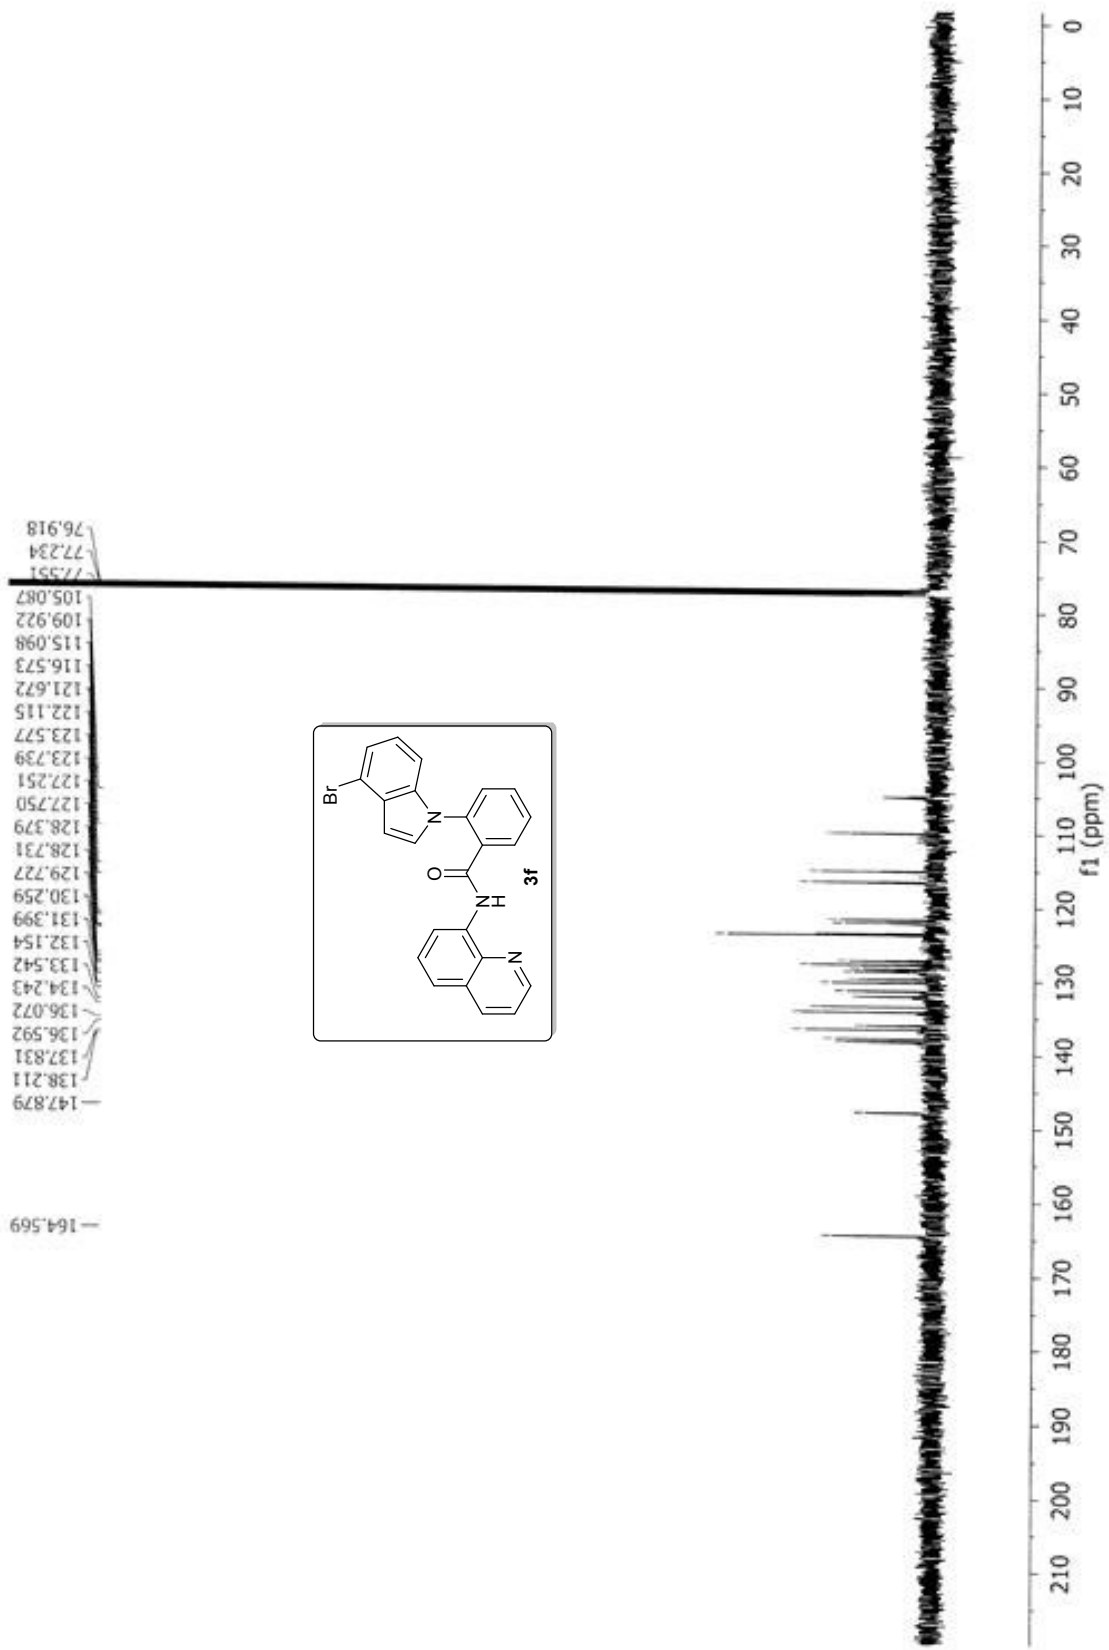

SP-825-4Br-1H

9.841  
8.712  
8.707  
8.693  
8.689  
8.115  
8.107  
8.102  
8.096  
8.092  
8.024  
8.020  
8.003  
7.999  
7.669  
7.665  
7.650  
7.646  
7.618  
7.602  
7.584  
7.529  
7.510  
7.479  
7.458  
7.440  
7.432  
7.427  
7.411  
7.407  
7.339  
7.333  
7.297  
7.288  
7.279  
7.266  
7.260  
7.251  
6.435  
6.427  
-1.636

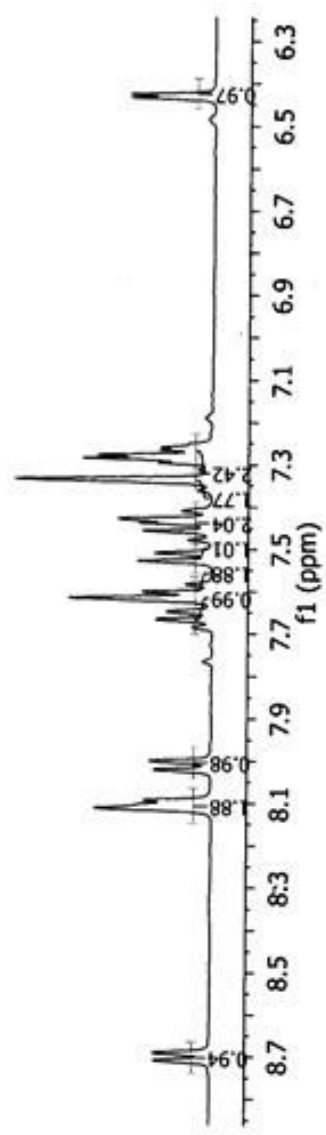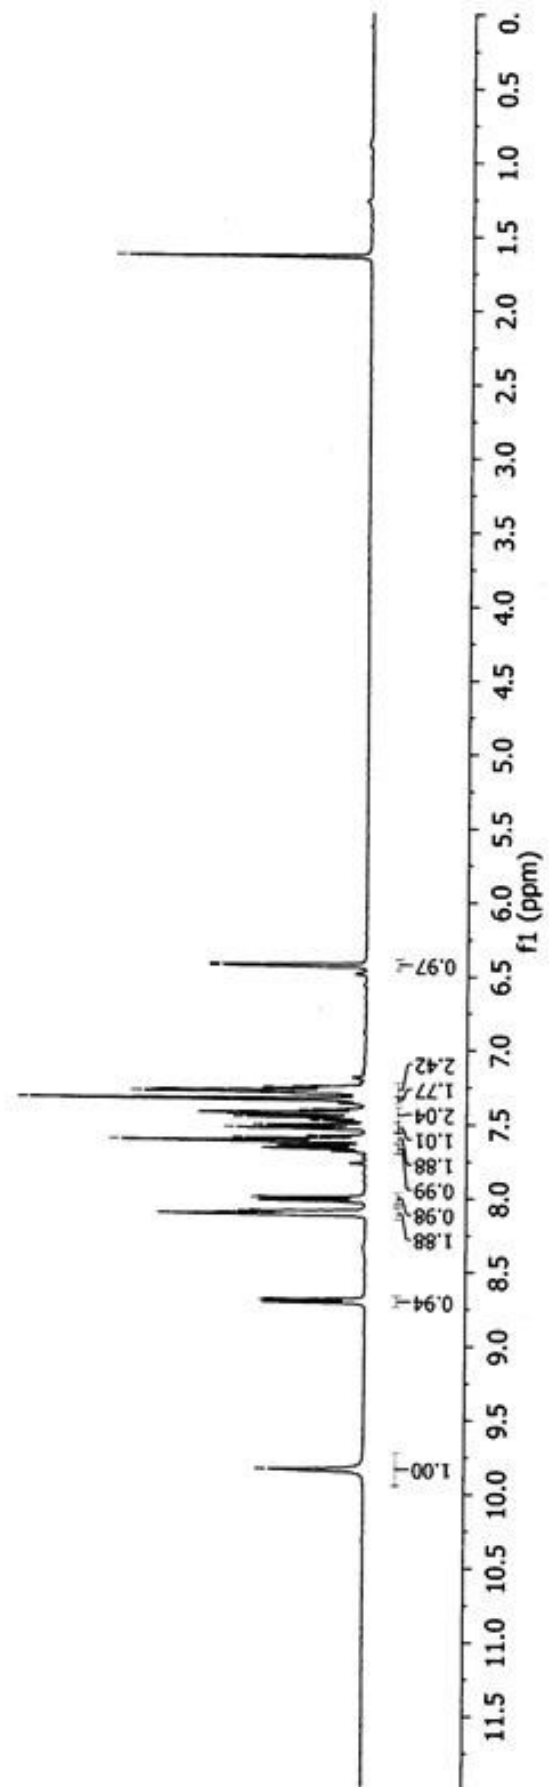

SpinWorks 4: SP-825-13C

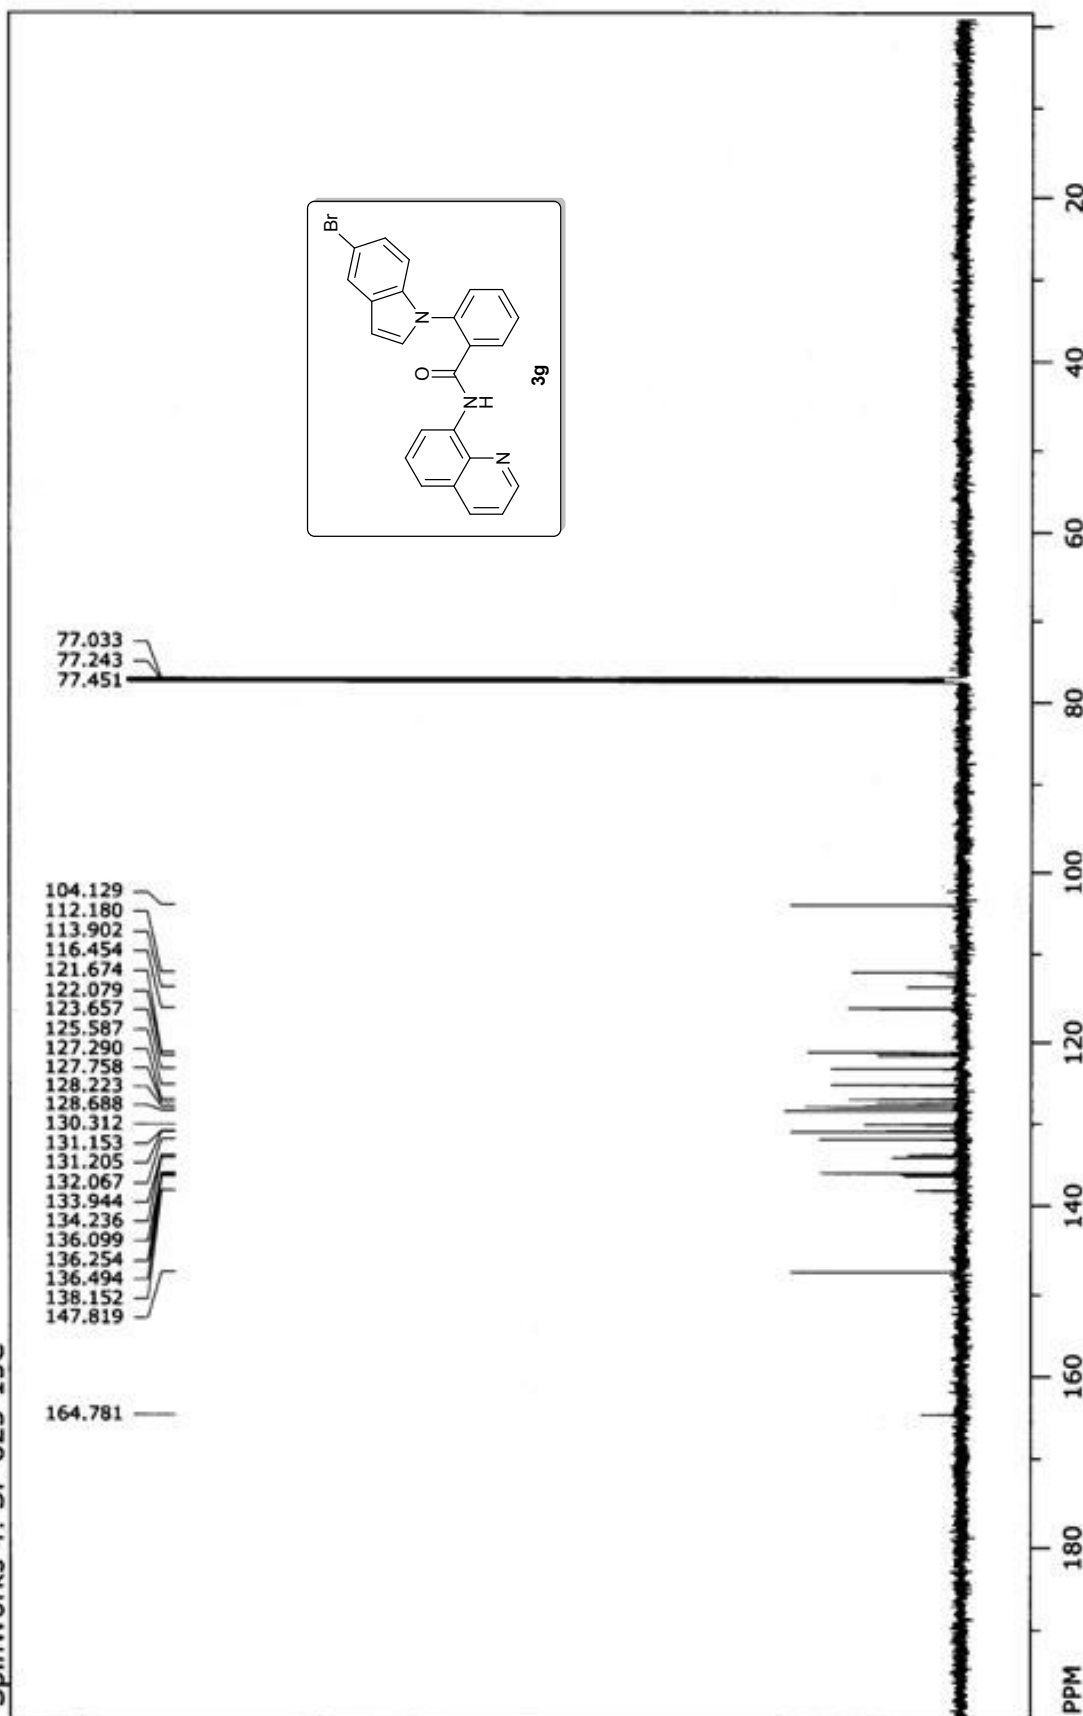

file: H:\SP-825-13C\1\fid exp: <zgpg30>  
 transmitter freq.: 150.927957 MHz  
 time domain size: 32768 points  
 width: 42613.64 Hz = 282.3442 ppm = 1.300465 Hz/pt  
 number of scans: 97

freq. of 0 ppm: 150.912838 MHz  
 processed size: 16384 complex points  
 LB: 1.000 GF: 0.0000  
 Hz/cm: 1219.176 ppm/cm: 8.07786

SP-831-OMe-1H

9.960  
8.734  
8.730  
8.715  
8.712  
8.131  
8.127  
8.121  
8.117  
8.114  
8.099  
8.095  
7.993  
7.989  
7.972  
7.968  
7.658  
7.654  
7.635  
7.620  
7.615  
7.579  
7.575  
7.560  
7.556  
7.540  
7.537  
7.521  
7.517  
7.471  
7.451  
7.431  
7.407  
7.403  
7.386  
7.364  
7.273  
7.265  
7.258  
7.249  
7.239  
7.229  
7.218  
6.966  
6.960  
6.914  
6.908  
6.891  
6.885  
6.445  
6.437  
3.814  
3.811

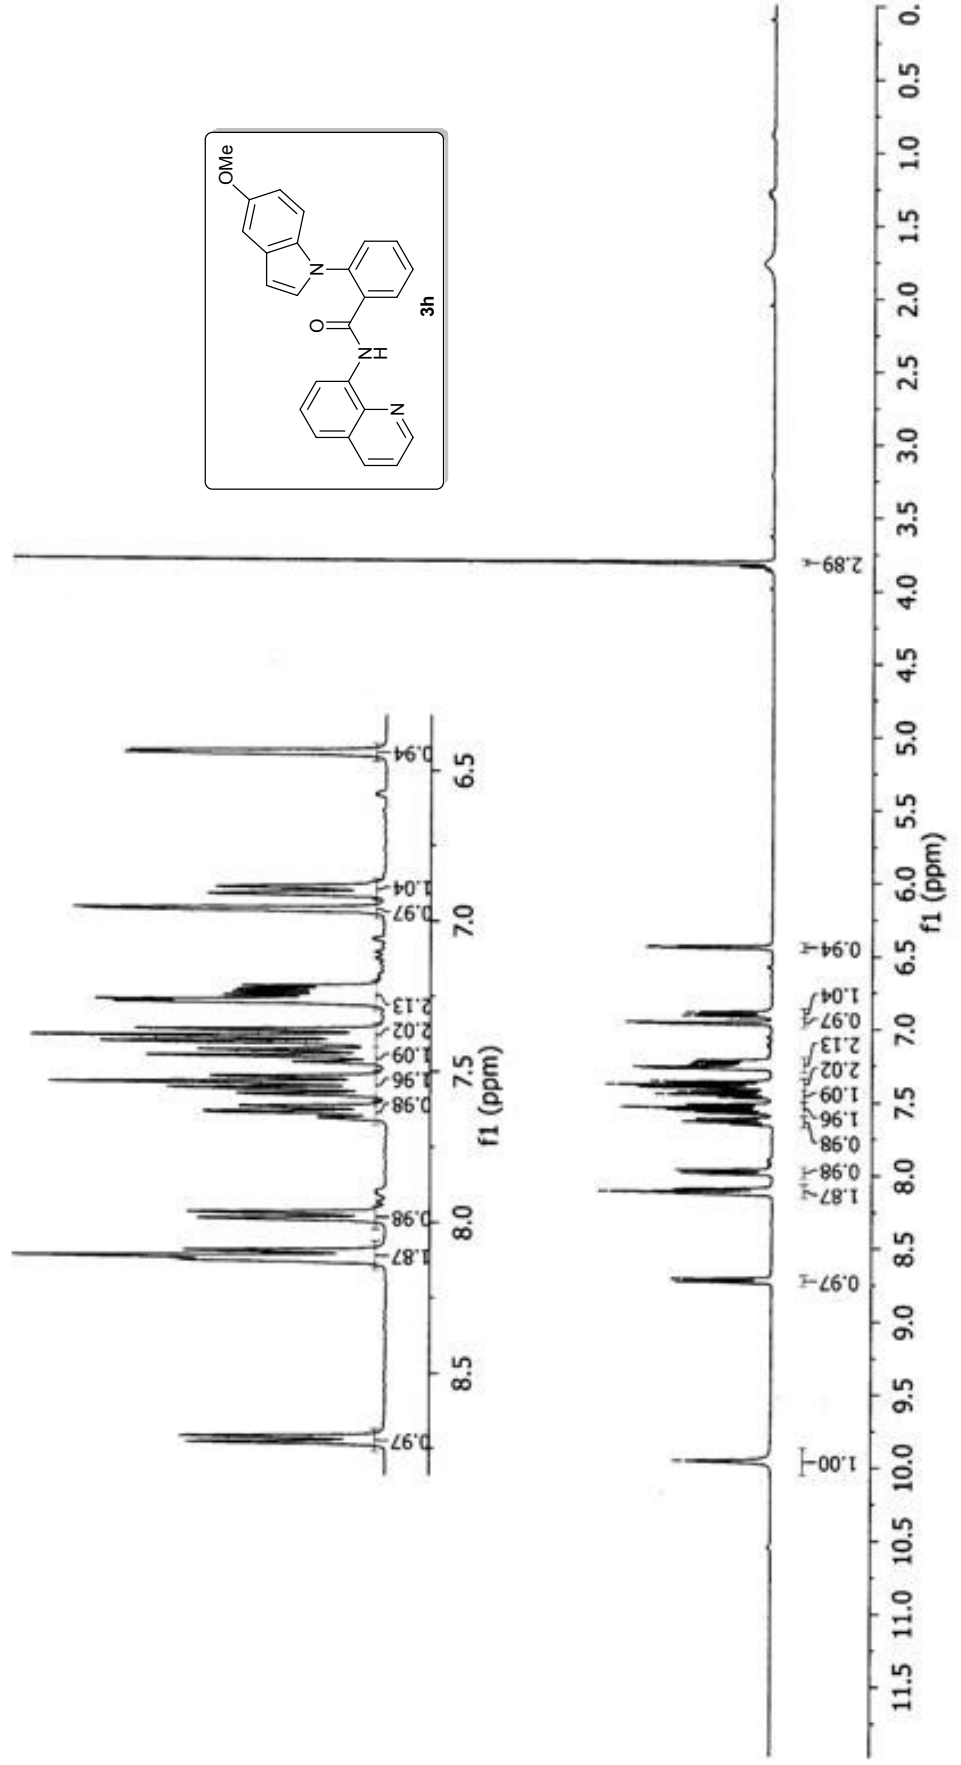

SP-831-OMe-13C

165.033  
154.758  
147.732  
138.227  
137.148  
135.959  
134.381  
133.517  
132.774  
131.951  
131.132  
130.056  
129.670  
128.122  
127.683  
127.254  
121.870  
121.474  
116.441  
112.762  
111.416  
104.491  
102.935  
77.550  
77.232  
76.914  
76.914  
56.011

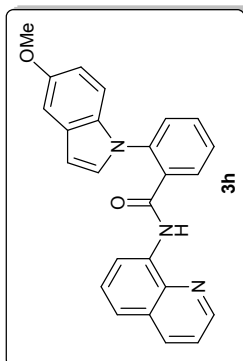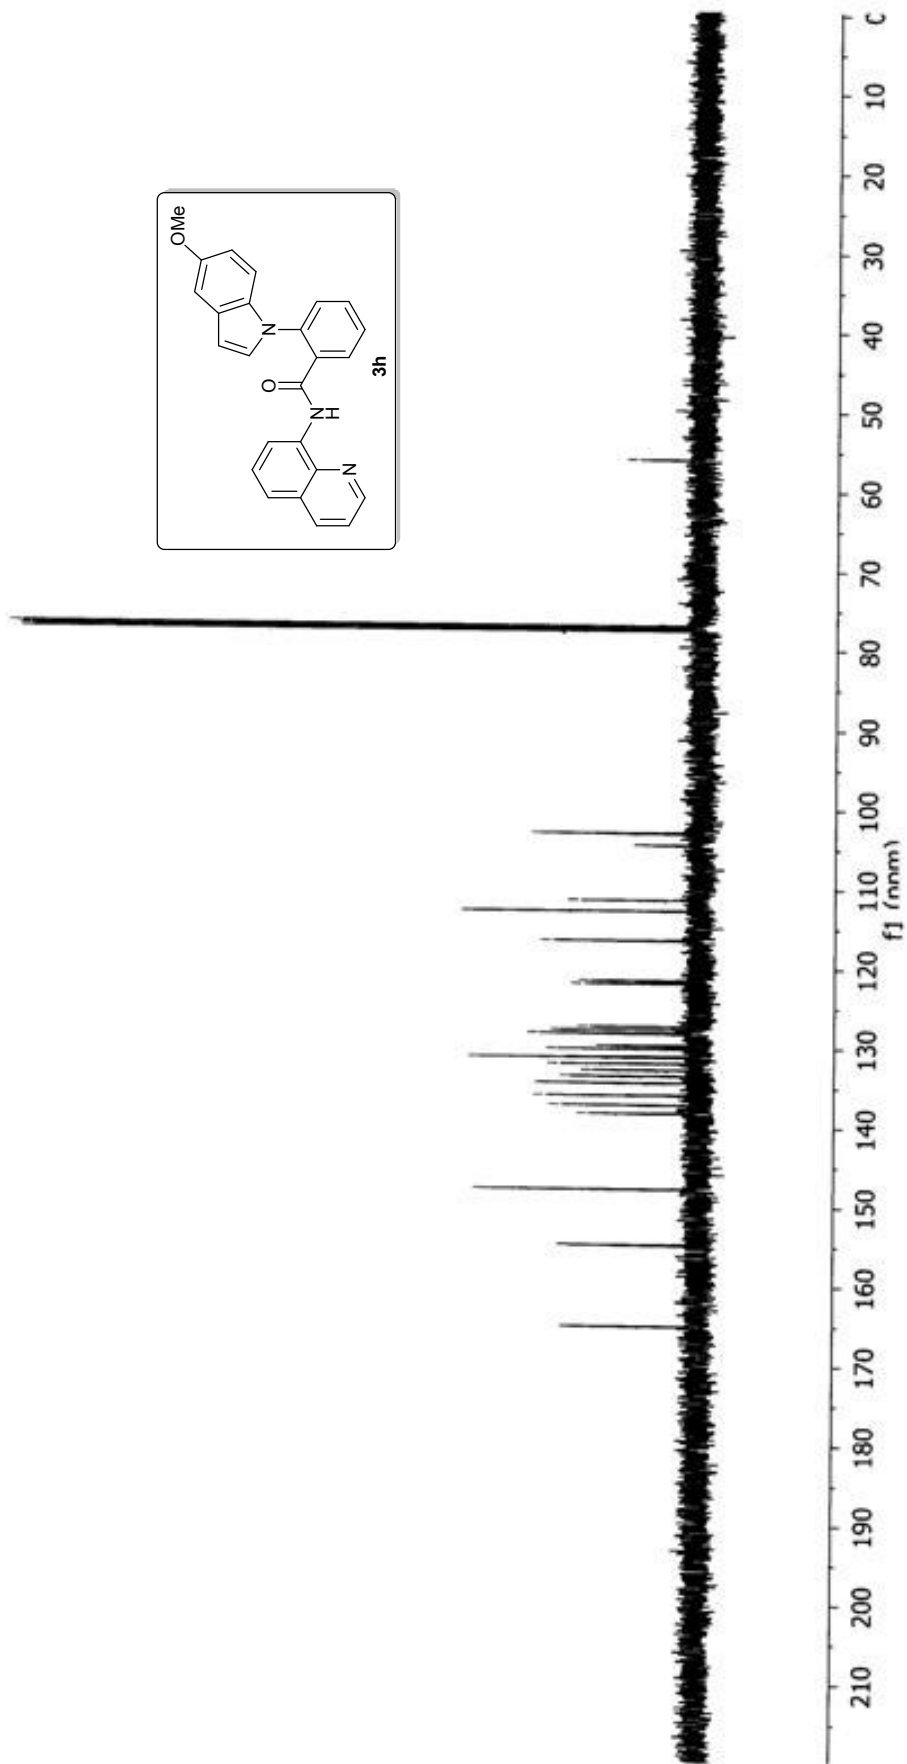



SP-832-6Br-1H

9.782  
8.630  
8.626  
8.611  
8.607  
8.030  
8.026  
8.015  
7.998  
7.993  
7.913  
7.909  
7.893  
7.889  
7.602  
7.588  
7.584  
7.568  
7.536  
7.520  
7.517  
7.498  
7.461  
7.441  
7.388  
7.368  
7.348  
7.332  
7.328  
7.312  
7.308  
7.284  
7.263  
7.171  
7.161  
7.157  
7.150  
7.140  
6.362  
6.354

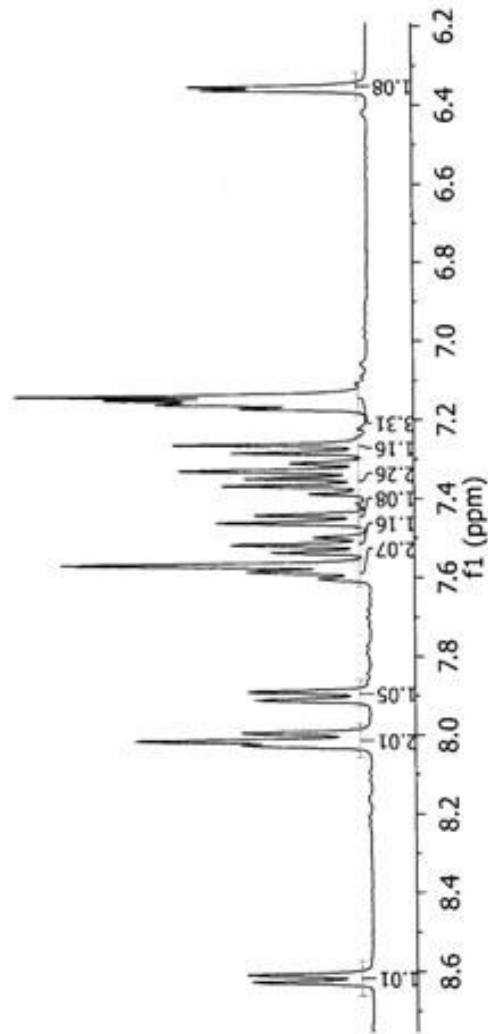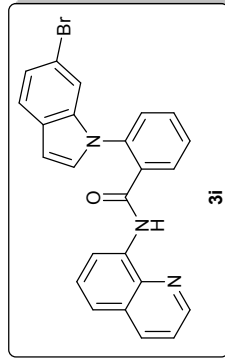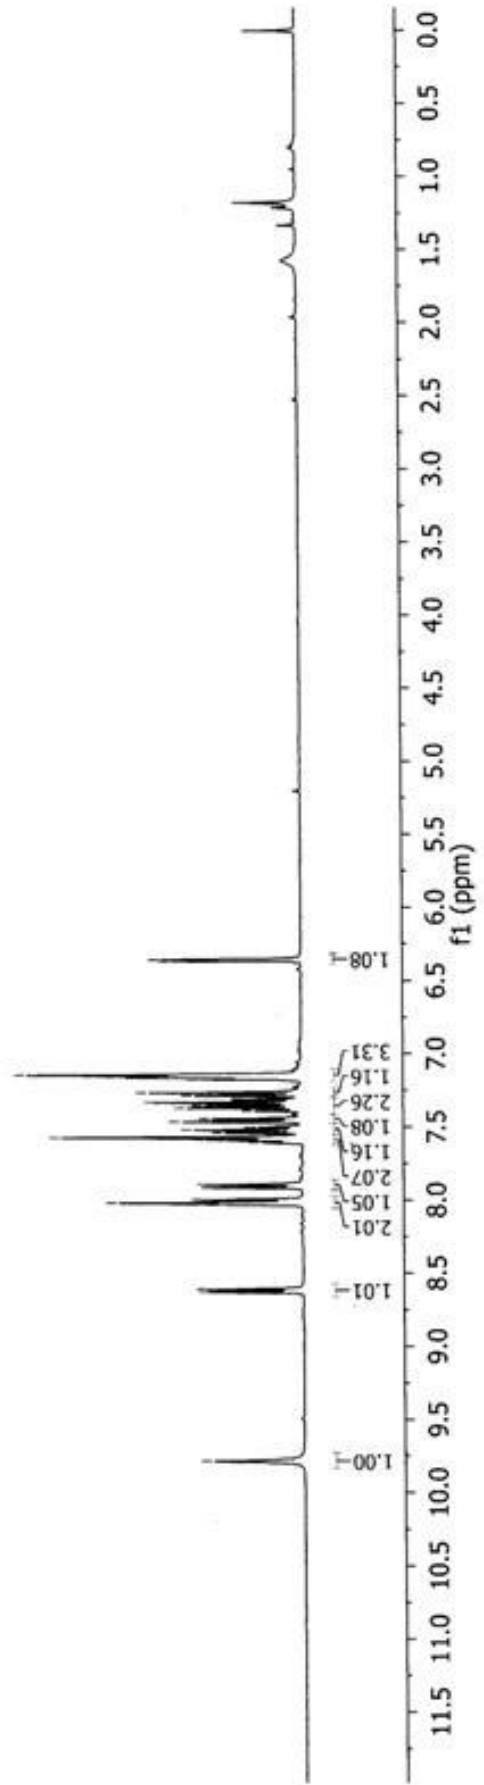

SP-832-6Br-13C

147.901  
138.238  
138.106  
136.307  
135.996  
134.227  
134.060  
132.039  
131.104  
129.852  
128.733  
128.241  
128.211  
127.673  
127.248  
123.891  
122.410  
122.009  
121.584  
116.392  
116.319  
113.657  
104.657  
77.548  
77.230  
76.913

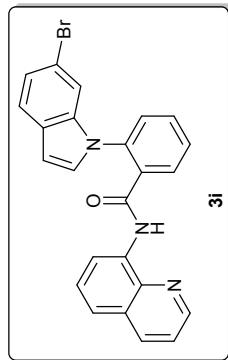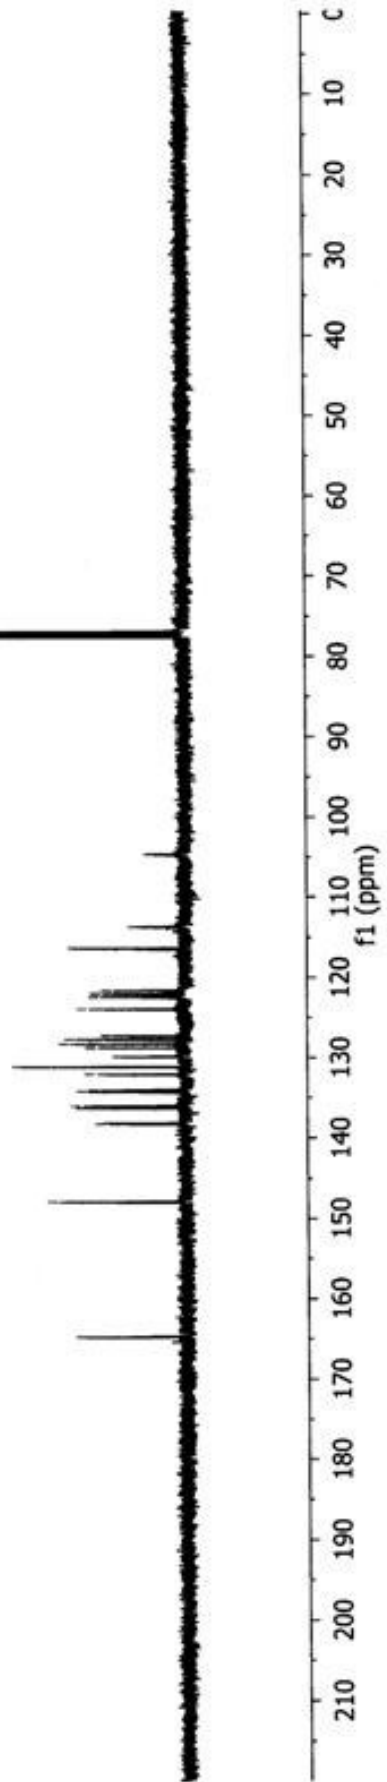

SP-832-aza

9.906  
8.599  
8.587  
8.241  
8.233  
8.119  
8.116  
8.110  
7.973  
7.960  
7.934  
7.920  
7.733  
7.731  
7.720  
7.718  
7.599  
7.587  
7.574  
7.562  
7.510  
7.498  
7.485  
7.376  
7.363  
7.354  
7.348  
7.332  
7.319  
7.187  
7.183  
7.179  
7.173  
7.166  
6.975  
6.962  
6.967  
6.954  
6.397  
6.391  
-1.177

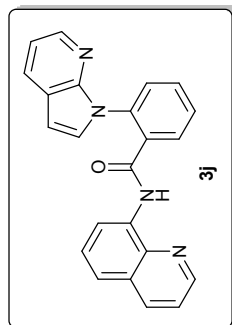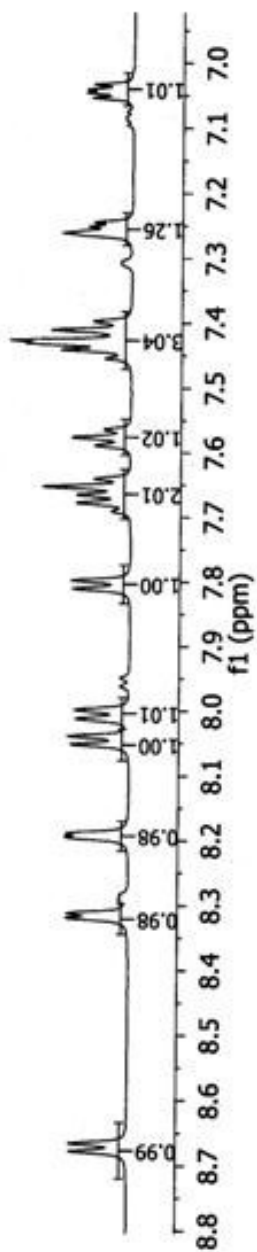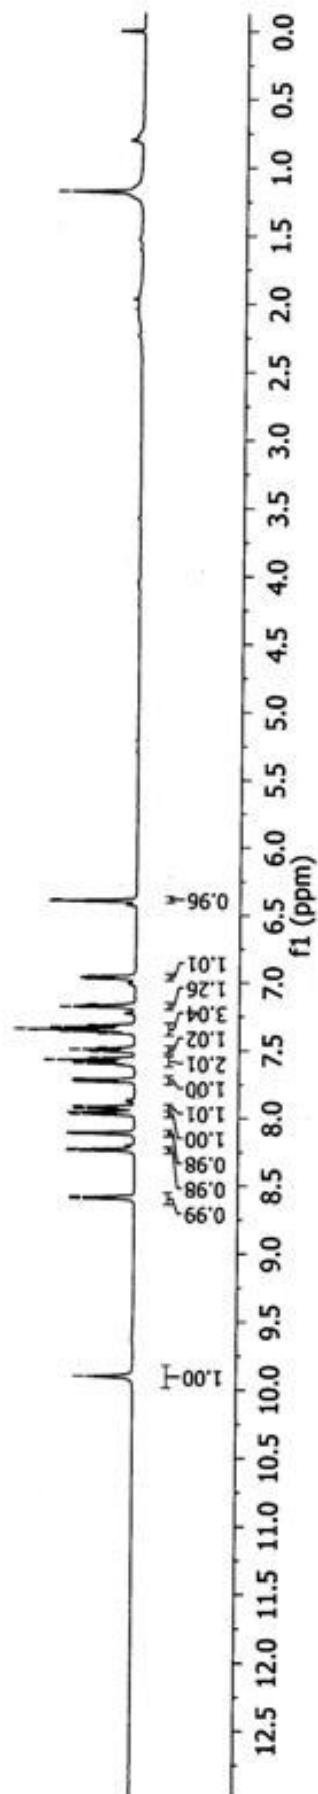

SpinWorks 4: SP-832B-13C

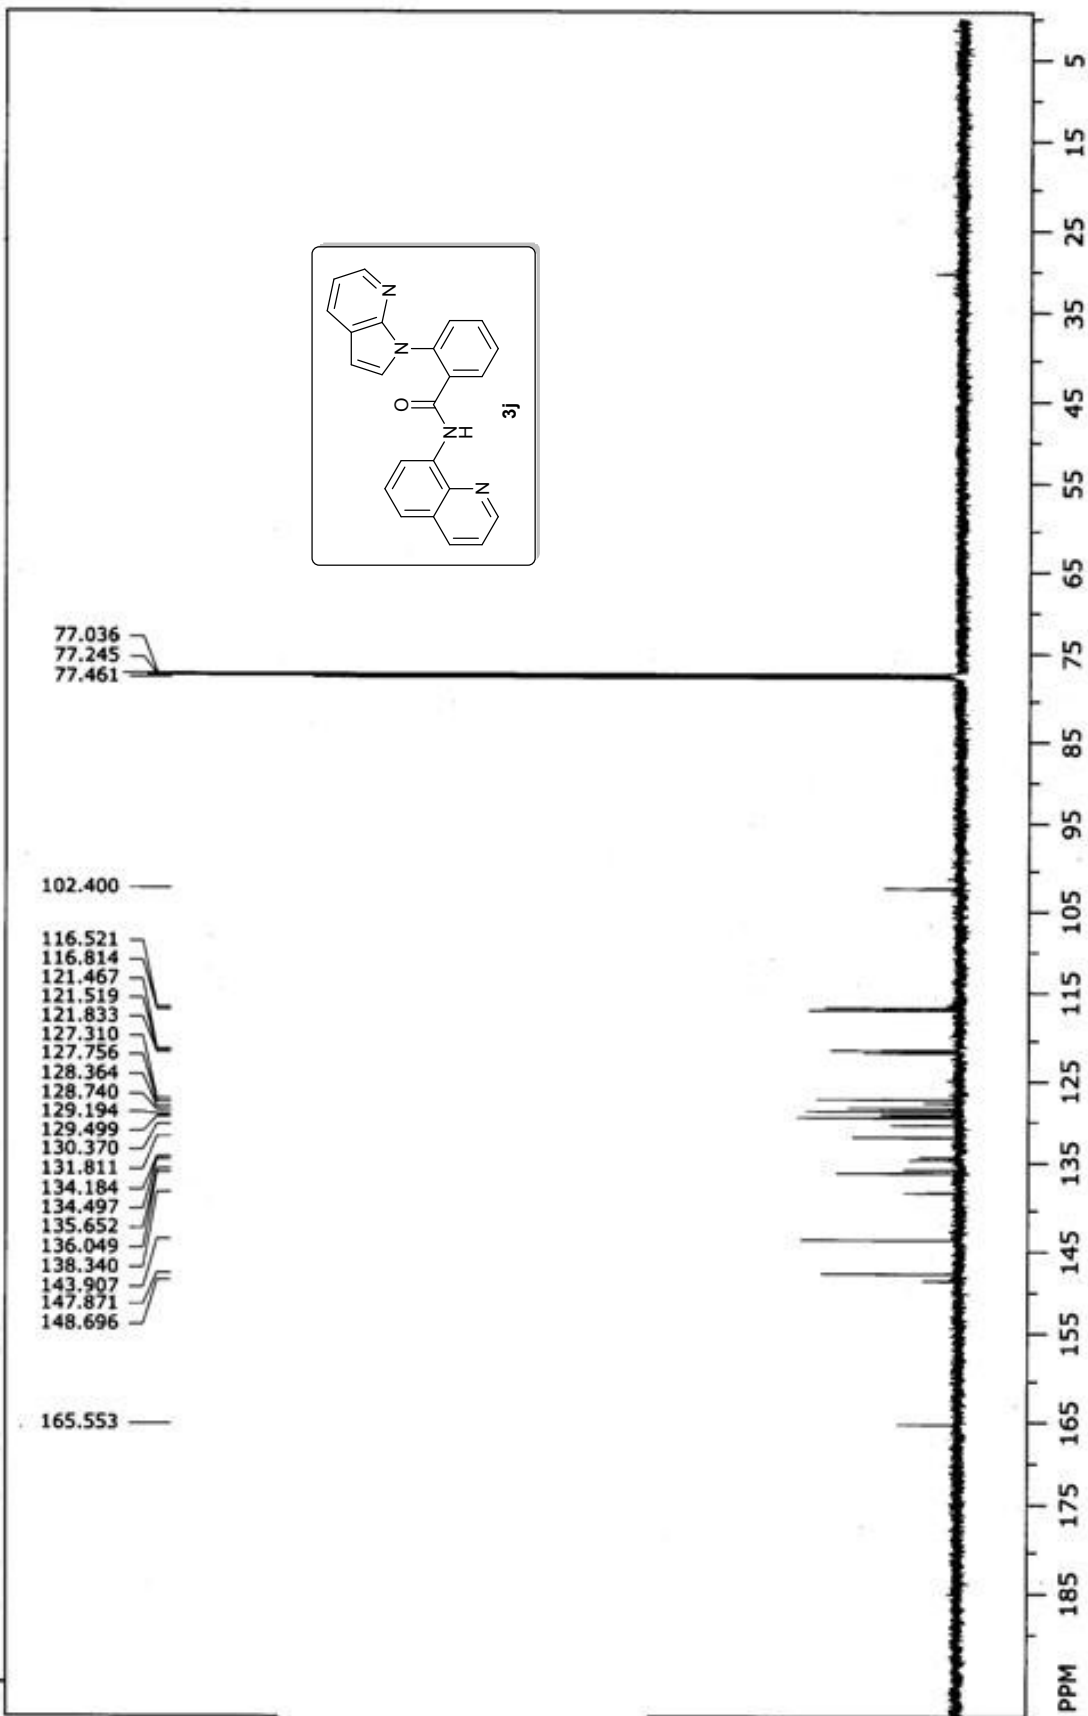

file: H:\SP-832B-13C\1\fid exp: <zpgg30>  
 transmitter freq.: 150.927957 MHz  
 time domain size: 32768 points  
 width: 42613.64 Hz = 282.3442 ppm = 1.300465 Hz/pt  
 number of scans: 107

freq. of 0 ppm: 150.912838 MHz  
 processed size: 16384 complex points  
 LB: 1.000 GF: 0.0000  
 Hz/cm: 1206.524 ppm/cm: 7.99404

SP-689-PR-1H

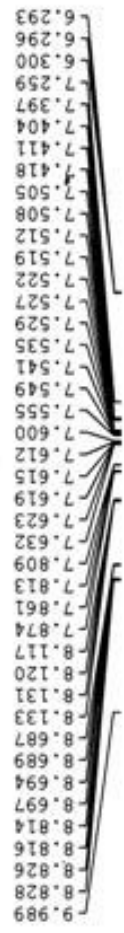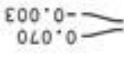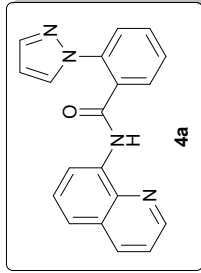

Current Data Parameters  
NAME SP-689-PR-1H  
PROCNO 1  
F2 - Acquisition Parameters  
Date\_ 20150323  
Time 14.33  
INSTRUM spect  
PROBHD 5 mm FAIMS QNP  
PULPROG zgpg30  
TD 32768  
SOLVENT CDCl3  
NS 16  
DS 4  
SWH 13209.230 Hz  
FIDRES 0.346788 Hz  
AQ 1.2431488 sec  
RG 99.36  
DM 41.00 usec  
DE 8.70 usec  
TE 297.3 K  
D1 1.00000000 sec  
TD09 1  
===== CHANNEL f1 =====  
NUC1 600.131043 MHz  
MUL1 4  
P1 12.00 usec  
PL1 21.00000000 W  
F2 - Processing parameters  
Date\_ 20150323  
Time 14.33  
INSTRUM spect  
PROBHD 5 mm FAIMS QNP  
SOLVENT CDCl3  
NS 16  
DS 4  
SWH 13209.230 Hz  
FIDRES 0.346788 Hz  
AQ 1.2431488 sec  
RG 99.36  
DM 41.00 usec  
DE 8.70 usec  
TE 297.3 K  
D1 1.00000000 sec  
TD09 1

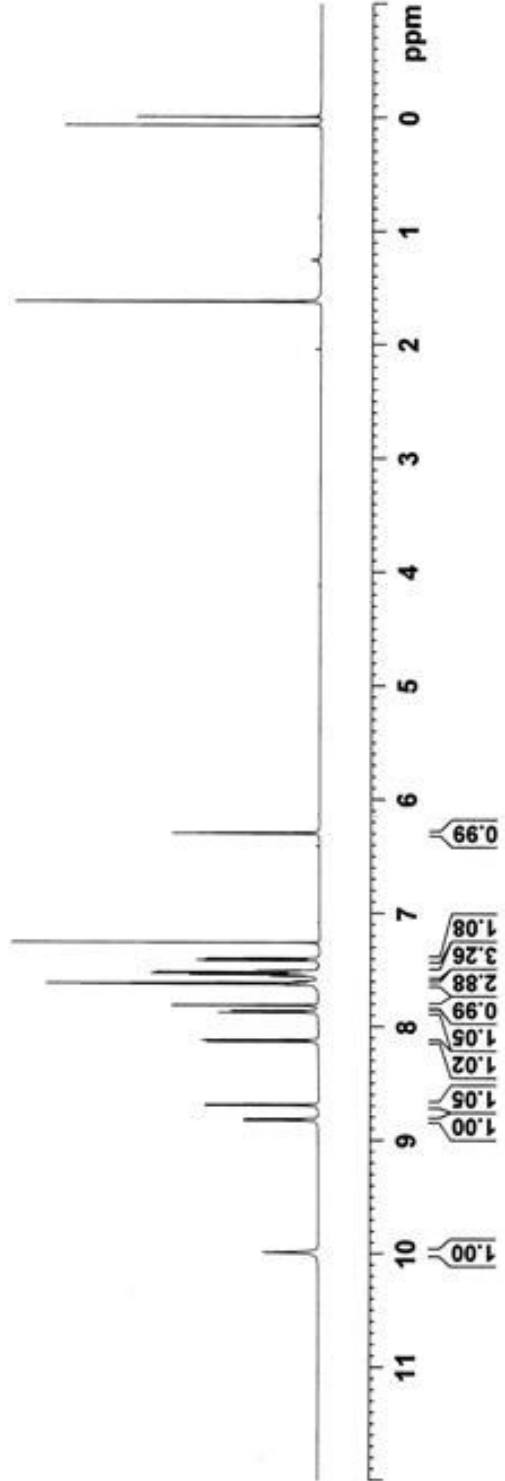

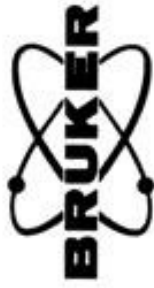

SP-689-Pr\_13C

Current Data Parameters  
NAME SP-689-Pr\_13C  
EXPNO 1  
PROCNO 1

F2 - Acquisition Parameters  
Date\_ 20150401  
Time\_ 12:22  
INSTRUM spect  
PROBHD 5 mm PABBO BB/  
PULPROG zgpg30  
TD 32768  
SOLVENT CDC13  
NS 480  
DS 2  
SWH 36057.691 Hz  
FIDRES 1.100393 Hz  
AQ 0.4543829 sec  
RG 65.24  
DW 13.867 usec  
DE 6.50 usec  
TE 297.8 K  
D1 2.00000000 sec  
D11 0.03000000 sec  
TDO 1

CHANNEL f1  
SFO1 150.9279571 MHz  
NUC1 13C  
P1 10.50 usec  
PLW1 95.00000000 W

CHANNEL f2  
SFO2 600.1724007 MHz  
NUC2 1H  
CPDPRG2 waltz16  
PCPD2 70.00 usec  
PLW2 21.00000000 W  
PLW12 0.61714000 W  
PLW13 0.30239999 W

F2 - Processing parameters  
SI 16384  
SF 150.9128368 MHz  
WDW EM  
SSB 0  
LB 1.00 Hz  
GB 0  
PC 1.40

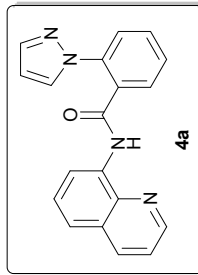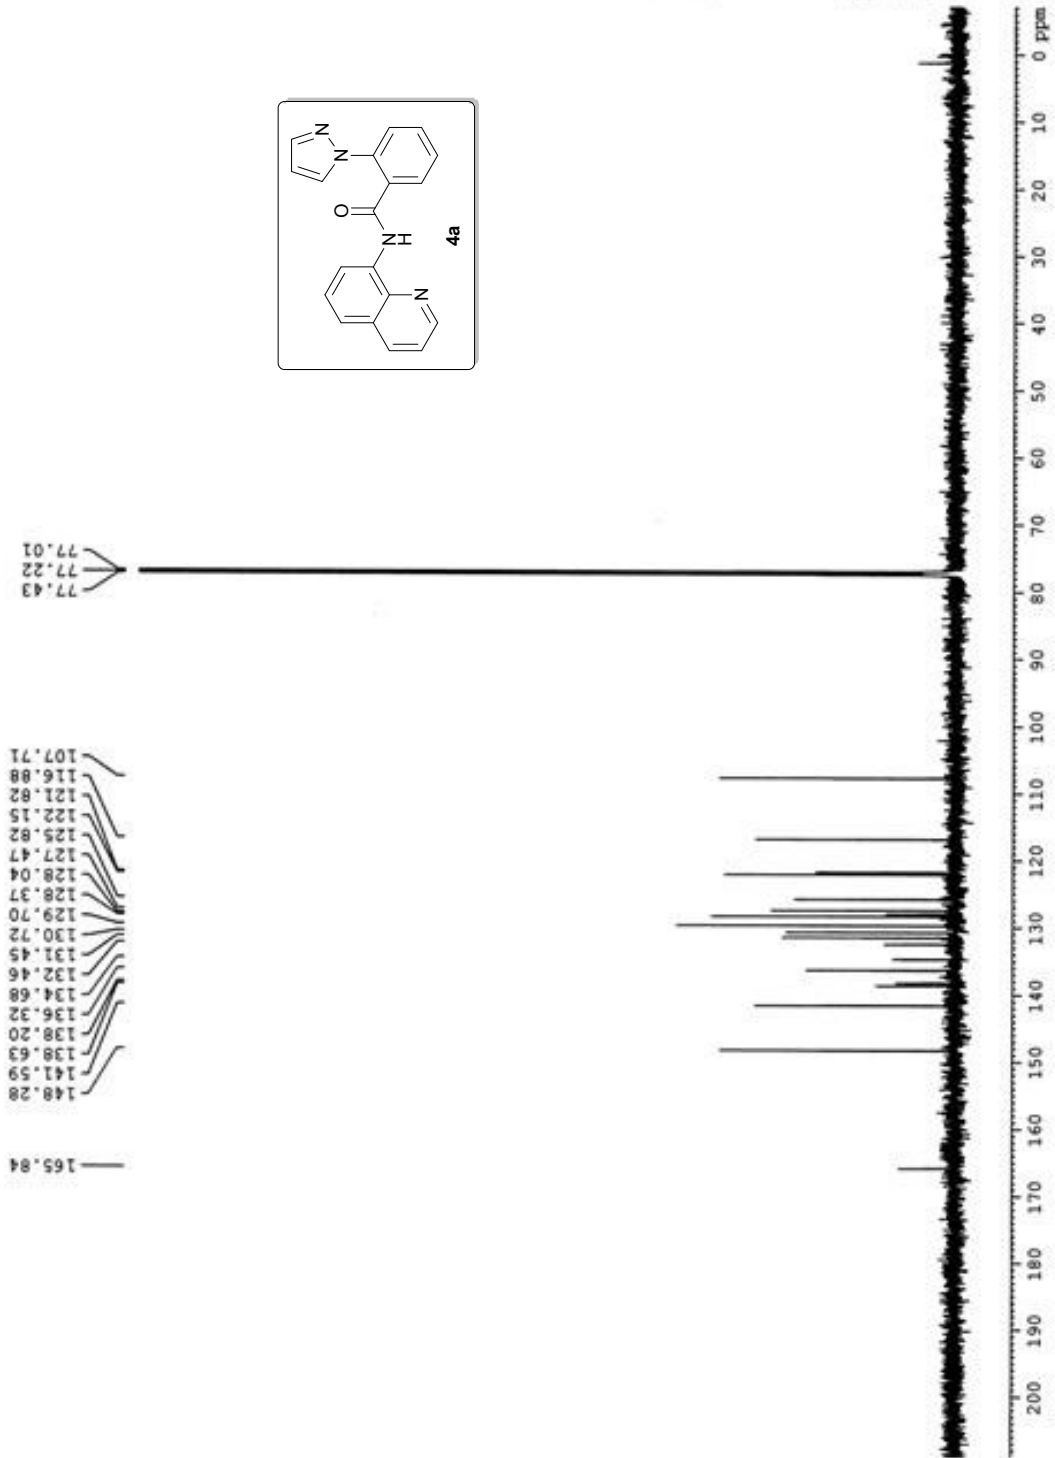

SP-697-1H

10.007  
8.829  
8.816  
8.704  
8.701  
8.697  
8.694  
8.129  
8.127  
8.116  
8.113  
7.854  
7.843  
7.841  
7.658  
7.655  
7.621  
7.609  
7.608  
7.601  
7.599  
7.589  
7.587  
7.575  
7.573  
7.555  
7.542  
7.529  
7.515  
7.502  
7.490  
7.488  
7.478  
7.475  
7.415  
7.408  
7.401  
7.394  
7.260  
6.042  
6.038

2.185

Current Data Parameters  
NAME SP-697-1H  
PROCNO 1  
F2 - Acquisition Parameters  
Date\_ 201507  
Time 11.42  
INSTRUM spect  
PROBHD 5 mm PABBO BBI  
PULPROG zg30  
TD 32768  
SOLVENT CDCl3  
NS 16  
DS 4  
SWH 12019.230 MHz  
FIDRES 0.364798 MHz  
AQ 1.3631488 sec  
RG 89.47  
SM 41.600 usec  
SFO 500.13047 MHz  
TE 296.2 K  
D1 1.00000000 sec  
T20 1

===== CHANNEL f1 =====  
F01 600.137043 MHz  
P1 12.00 usec  
PL1 0.00 dB  
RG1 31.0000000 M  
SFO1 600.137047 MHz

F2 - Processing parameters  
SI 32768  
SF 600.137047 MHz  
WDW EM  
SSB 0  
CB 0  
GB 0  
PC 1.00

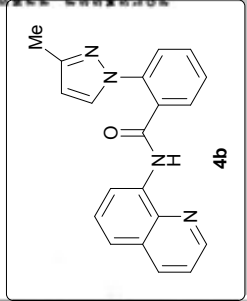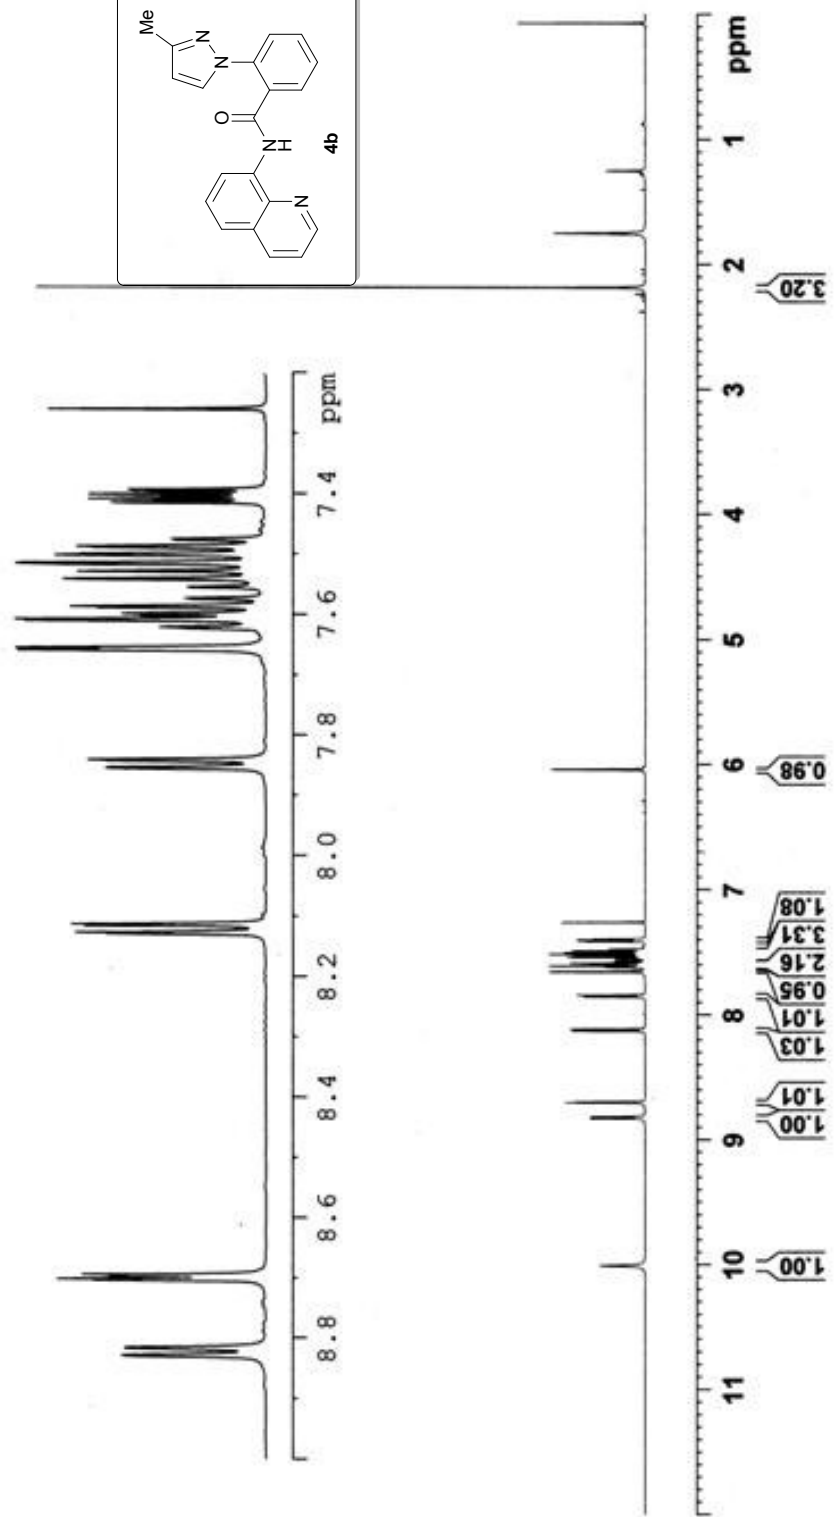

SP-697-13C

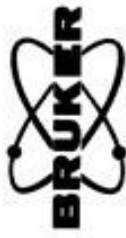

Current Data Parameters  
NAME SP-697-13C  
EXNO 1  
PROCNO 1

F2 - Acquisition Parameters  
Date\_ 20150407  
Time 11.15  
INSTRUM spect  
PROBHD 5 mm PABBO BB/  
PULPROG zgpg30  
TD 32768  
SOLVENT CDCl3  
NS 422  
DS 2  
SWH 36057.691 Hz  
FIDRES 1.100393 Hz  
AQ 0.4543829 sec  
RG 65.24  
DE 13.867 usec  
TE 297.8 K  
D1 2.00000000 sec  
D11 0.03000000 sec  
TDO 1

CHANNEL f1  
SFO1 150.9279571 MHz  
NUC1 13C  
P1 10.50 usec  
PLM1 95.00000000 W

CHANNEL f2  
SFO2 600.1724007 MHz  
NUC2 1H  
PCPD2 waltz16  
PLM2 21.00000000 W  
PLM12 0.61714000 W  
PLM13 0.36239999 W

F2 - Processing parameters  
SI 16384  
SF 150.9126376 MHz  
WDW EM  
SSB 0  
LB 0 1.00 Hz  
GB 0  
PC 1.40

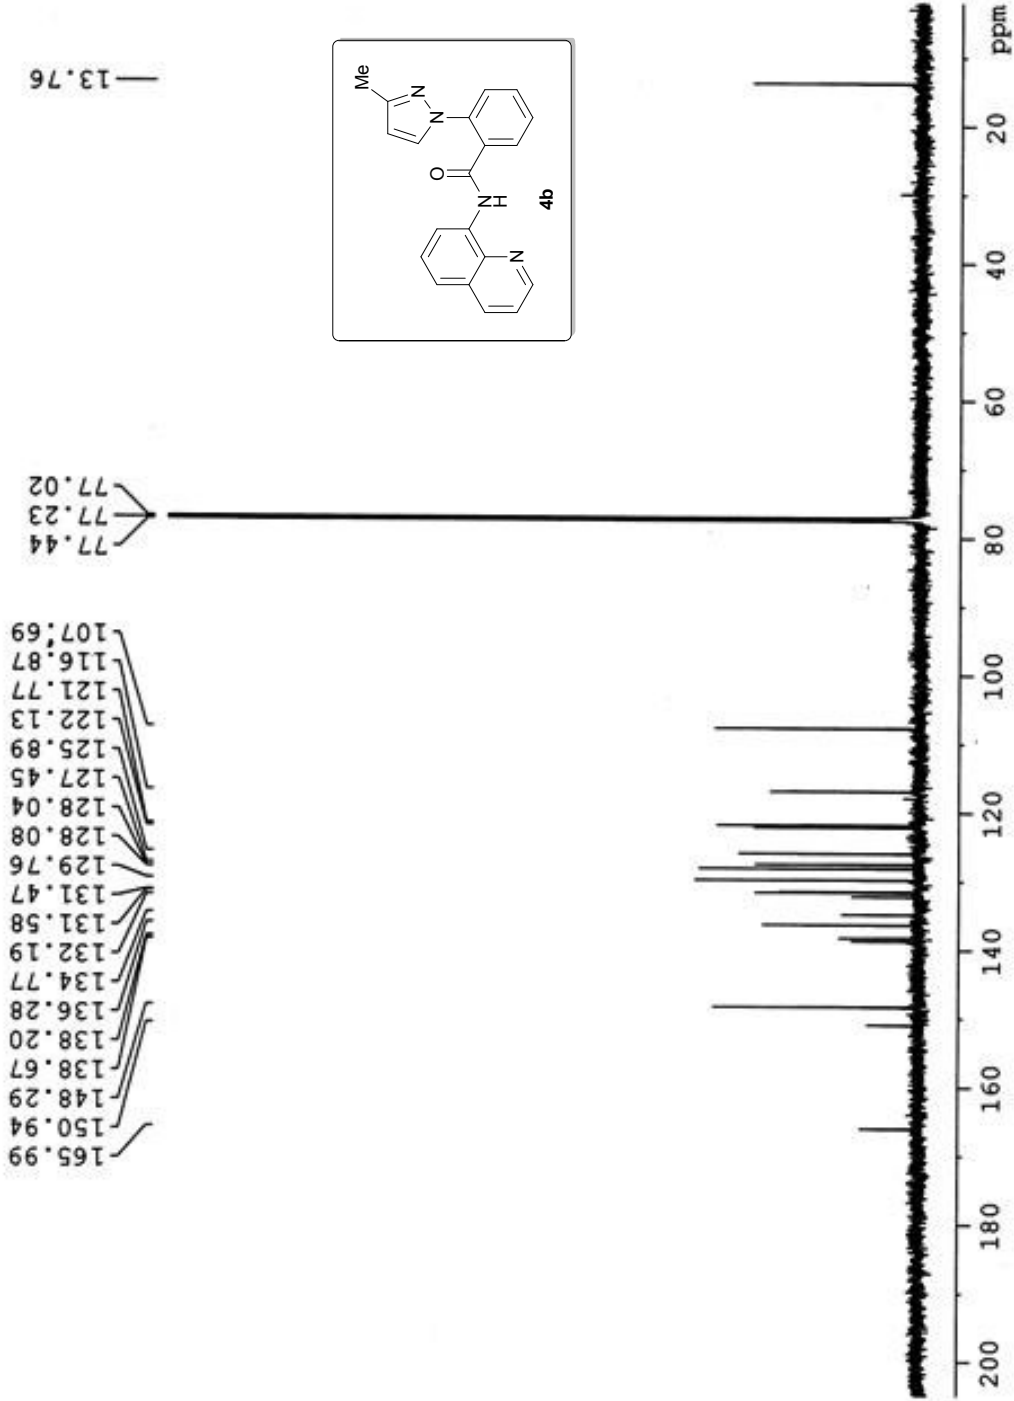



SP-CARB-1\_1H

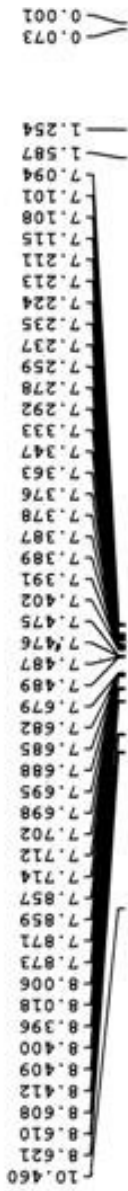

Current Data Parameters  
 NAME SP-CARB-1\_1H  
 EXPNO 1  
 PROCNO 1  
 F2 - Acquisition Parameters  
 Date\_ 20100819  
 Time 8:22  
 INSTRUM spect  
 PULPROG zgpg30  
 FREQ0 500.136098 MHz  
 TO F2 32764  
 SOLVENT CDCl3  
 NS 36  
 DS 4  
 SWH 13210.312 Hz  
 FWHM 10.64578 Hz  
 FT 32764  
 SFR 1.7631488 MHz  
 AQ 127.57  
 RG 327.57  
 DM 41.600 MHz  
 DE 6.50 dB  
 TE 300.2 K  
 O1 1.0000000 sec  
 TD 1  
 ===== CHANNEL f1 =====  
 NUC1 13C  
 P1 13  
 PL 0  
 PC 21.0000000 W  
 F2 - Processing parameters  
 SI 32764  
 SF 500.136098 MHz  
 WDW EM  
 SSB 0  
 LB 0  
 GB 0  
 PC 1.00

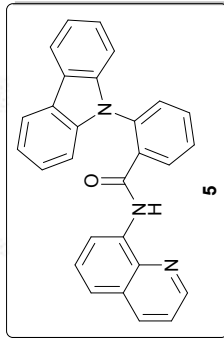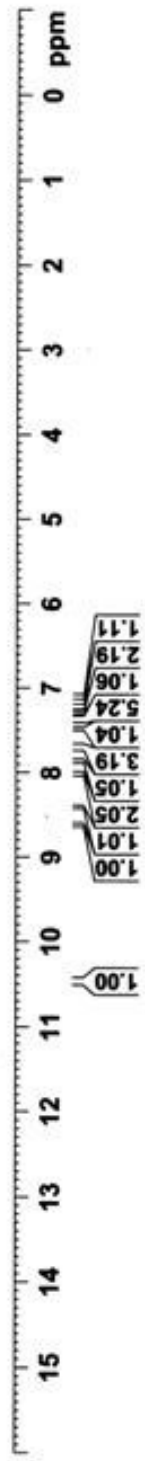

SP-CARB\_13C

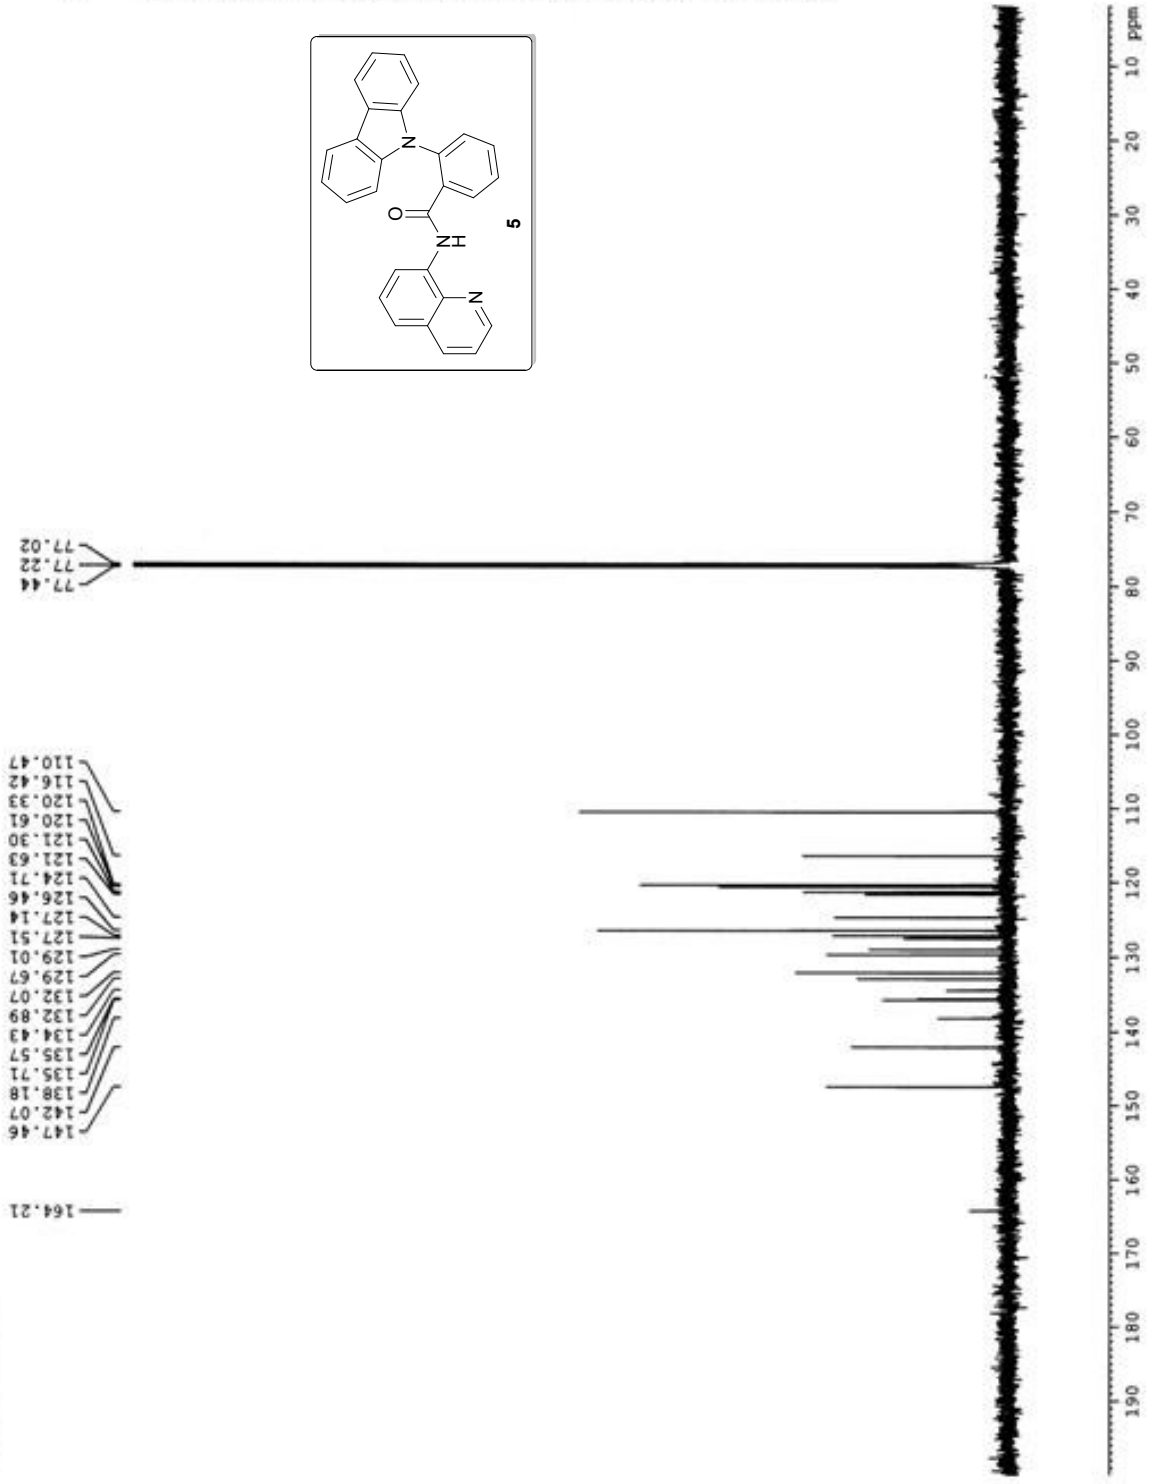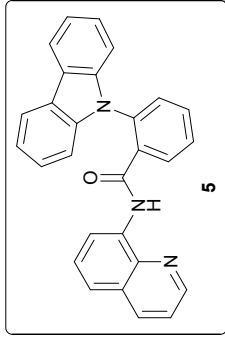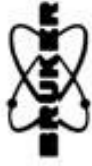

Current Data Parameters  
NAME SP-CARB\_13C  
EXPNO 1  
PROCNO 1

F2 - Acquisition Parameters  
Date\_ 20150807  
Time 11:58  
INSTRUM spect  
PROBHD 5 mm PABBO BB7  
PULPROG zgpg30  
TD 32768  
SOLVENT CDCl3  
DS 4  
SC 36057.891 Hz  
SWH 1.100393 Hz  
FIDRES 0.4543829 sec  
AQ 200.18  
RG 13.887 usec  
DE 2.150 usec  
TE 300.2 K  
D1 2.0000000 sec  
D11 0.0300000 sec  
TD0 1

\*\*\*\*\* CHANNEL f1 \*\*\*\*\*  
SF01 150.9279571 MHz  
NUC1 13C  
P1 10.00 usec  
PL1 0.00000000 M

\*\*\*\*\* CHANNEL f2 \*\*\*\*\*  
SF02 600.1724007 MHz  
NUC2 1H  
PCPD0[2] waltz16  
PCPD2 70.00 usec  
PL2 0.0000000 M  
PL3 0.4171000 M  
PL4 0.302399999 M

F2 - Processing parameters  
SI 16384  
SF 150.918356 MHz  
WDW EM  
SSB 0  
GB 0  
PC 1.40

SP-Cle\_1H

```

Current Data Parameters
NAME      SP-Cle_1H
EXPNO     1
PROCNO    1
F2 - Acquisition Parameters
Date_     20100819
Time      8.13
INSTRUM   spect
PROBHD    5 mm PALMBO
PULPROG   zg30
TD         32768
SOLVENT   CDCl3
NS         16
DS         4
SWH        12319.230 Hz
FIDRES     0.346798 Hz
AQ         1.3633488 sec
RG         43.16
SQ         41.655_usec
TE         300.2 K
DE         231.9 usec
DI         1.00000000 sec
TD0        1
===== CHANNEL f1 =====
NUC1       13C
P1         12.00 usec
PL1        21.00000000 W
===== CHANNEL f2 =====
NUC2       1H
P2         12.00 usec
PL2        21.00000000 W
F2 - Processing parameters
SI         400.1700344 MHz
SF         400.1700344 MHz
WDW        EM
SSB        0
LB         0
GB         0
PC         1.00
  
```

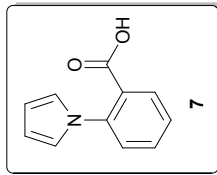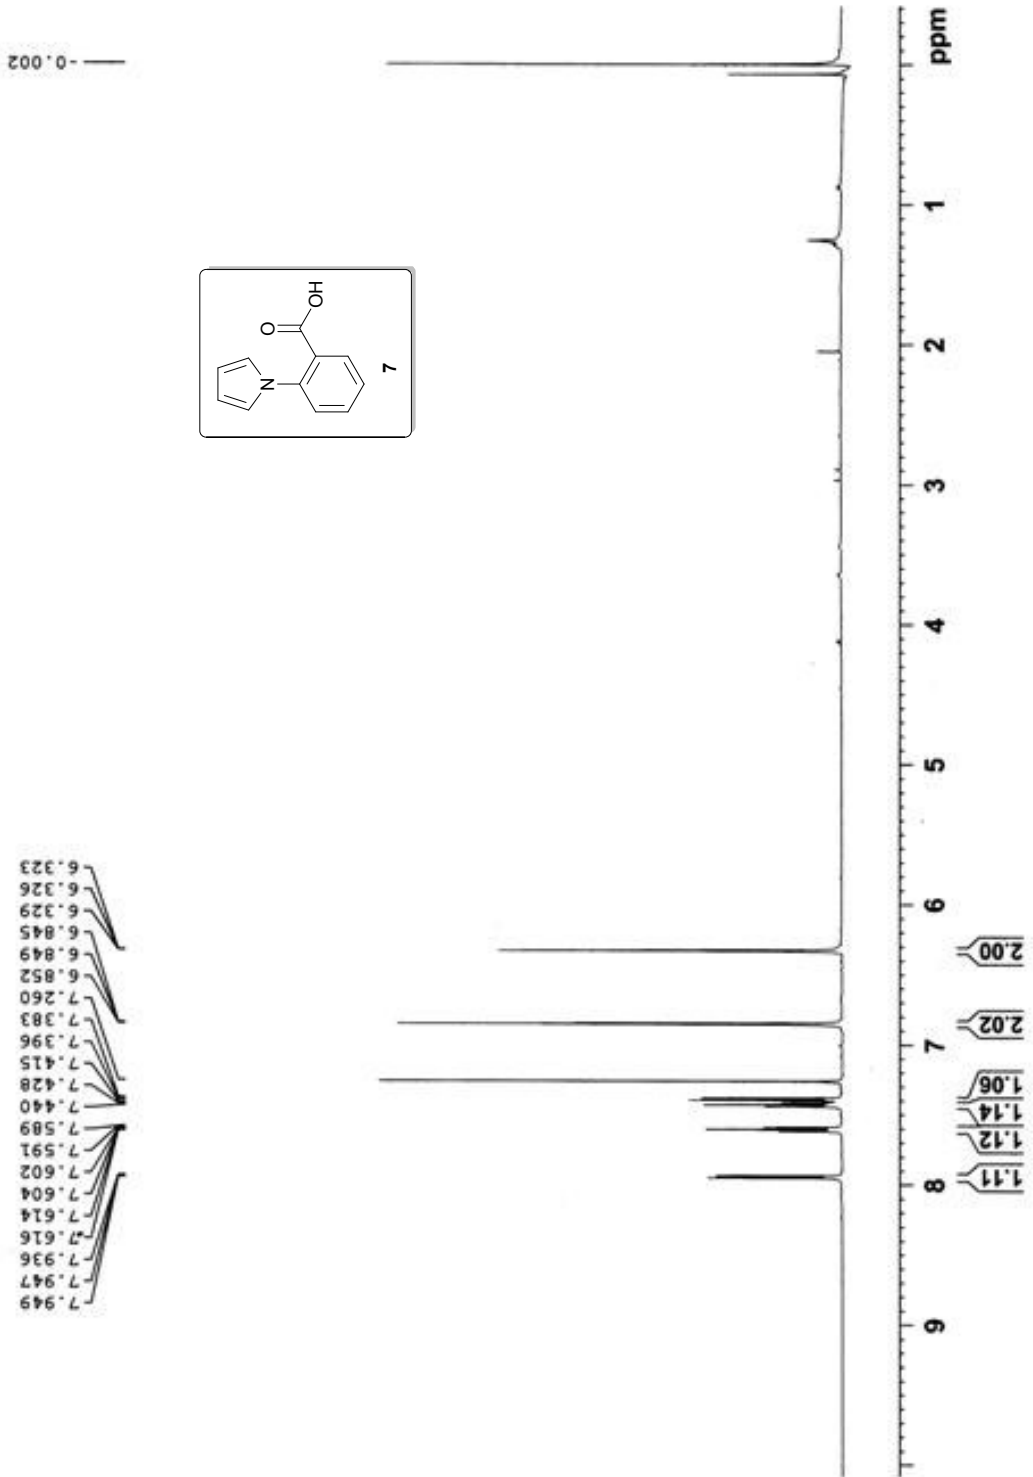

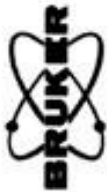

Current Data Parameters  
NAME sp-cleavage-13C  
EXPNO 1  
PROCNO 1

F2 - Acquisition Parameters  
Date\_ 201902  
Time 19:42  
INSTRUM spect  
PROBHD 5 mm PABBO-BB/  
PULPROG zgpg30  
TD 32768  
SOLVENT CDCl3  
NS 1926  
DS 2  
SWH 42613.637 KHz  
FIDRES 1.300465 KHz  
AQ 0.2844779 sec  
RG 200.18  
BW 11.713 usec  
DE 6.50 usec  
TE 295.2 K  
D1 2.0000000 sec  
D11 0.0300000 sec  
TD0 1

\*\*\*\*\* CHANNEL f1 \*\*\*\*\*  
SFO1 150.9274511 MHz  
NUC1 13C  
P1 10.50 usec  
PL1 95.0000000 M

\*\*\*\*\* CHANNEL f2 \*\*\*\*\*  
SFO2 600.1724007 MHz  
NUC2 1H  
PCPD2 waitz16  
PLM2 21.0000000 M  
PLM3 0.6174000 M  
PLM4 0.3023959 M

F2 - Processing parameters  
SI 32768  
SF 150.9129310 MHz  
WDW EM  
SSB 0  
LA 0  
GB 0  
PC 1.40

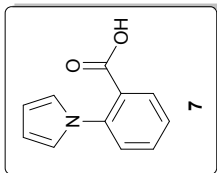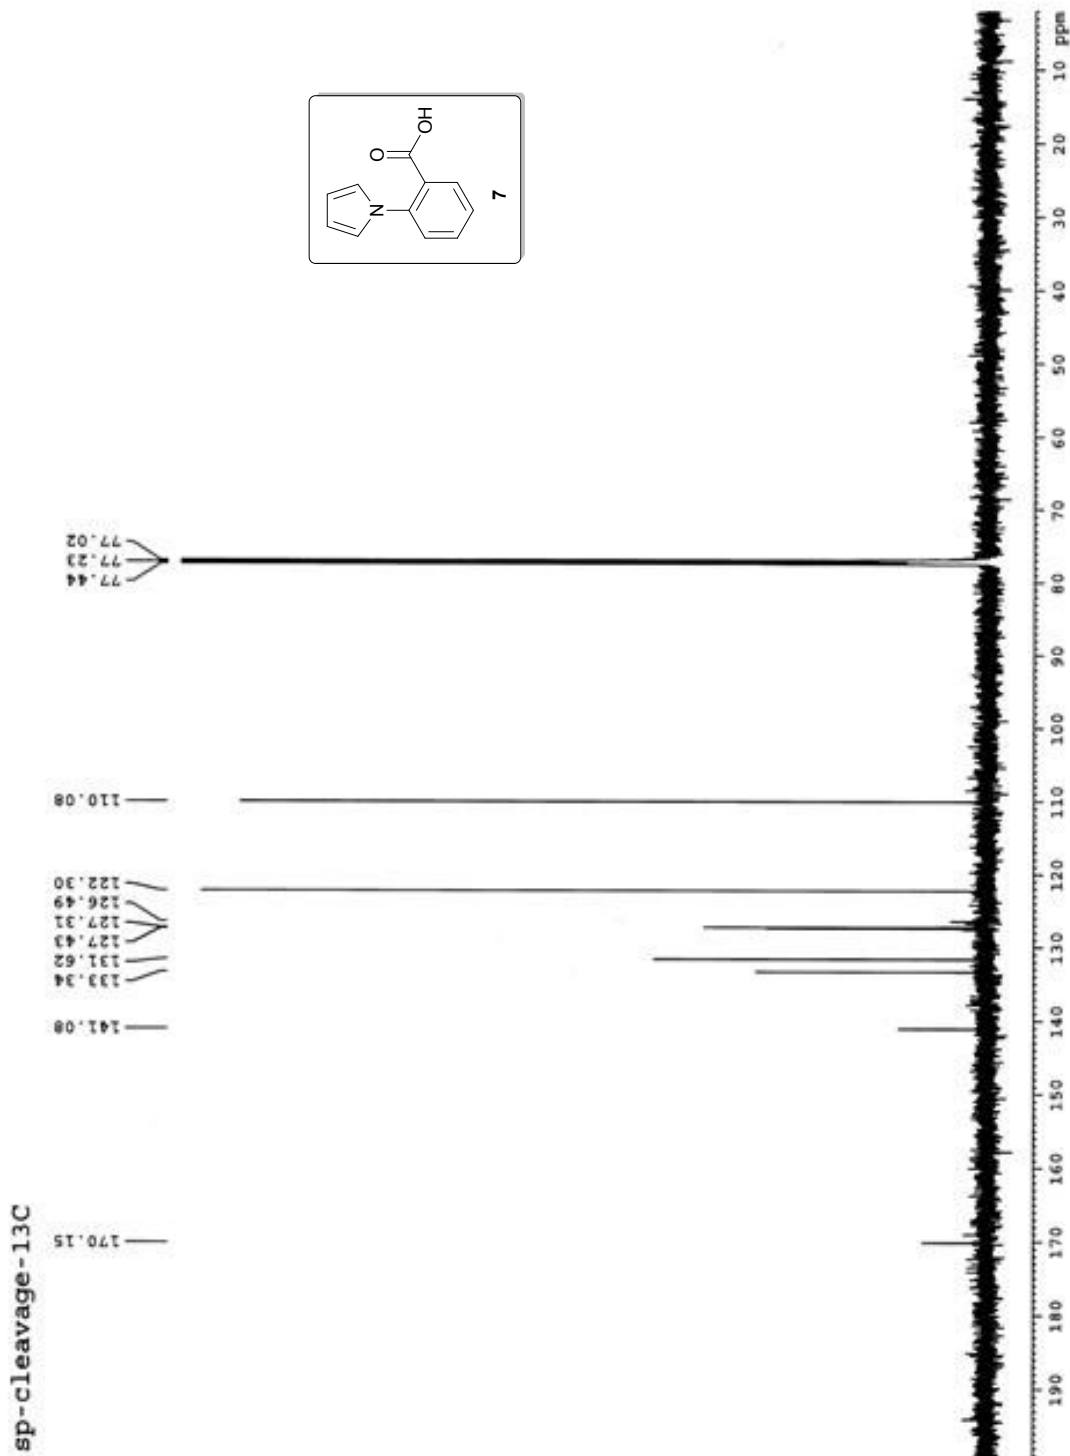

Supplement: c5cc08206d1.pdf [file c5cc08206d1.pdf]
